# Supplementary material for: Whole Genome Sequence of Alternaria alternata, the Causal Agent of Black Spot of Kiwifruit
Source: Front Microbiol. 2021 Sep 20;12:713462. doi: 10.3389/fmicb.2021.713462 (PMC8488381; doi:10.3389/fmicb.2021.713462)
Supplement: Supplementary file 1 [file Data_Sheet_1.xlsx]

## Sheet: S1
Supplementary Table 1 Gene families clustering result in each species
Species	Genes number	Genes in families	Unclustered genes	Family number	Unique families	Average genes per family
Z7	12048	11901	147	11351	8	1.05
SRC1lrK2f	13466	12179	1287	11426	6	1.07
FERA_1177	13574	13041	533	12036	16	1.08
Y784-BC03	11954	11757	197	11231	1	1.05
FERA_1164	13073	12869	204	11972	0	1.07
FERA_24350	12774	12631	143	11793	1	1.07
RGR_97_0013	12724	12555	169	11724	1	1.07
RGR_97_0016	12761	12581	180	11723	6	1.07

## Sheet: S2
Supplementary Table 2 Statistical results of repetitive sequences
Software	Repeat length(bp)	% of genome
RepeatMasker	348750	1.03
ProteinMask	1072954	3.17
Denovo	755976	2.23
Trf	93015	0.27
Total	1785227	5.27
（1）RepeatMasker: transposon elements predicted by RepeatMasker Based on the RepBase library and the proportion of total transposon elements in the genome
（2）ProteinMask：transposon elements predicted by ProteinMask Based on the RepBase library and the proportion of total transposon elements in the genome；
（3）Denovo：Use RepeatModeler to calculate the final sequence data file, and use it as an input file. And through the software to annotate the genomic repetitive sequence, calculate its total length and proportion in the genome.
（4）Trf： tandem repeats predicted by TRF in the genome and the proportion of total tandem repeats in genome.
（5）Total：The redundant repeats were excepted overlaps obtained from above all methods and the proportion of the total redundant repeats in the genome

## Sheet: S3
Supplementary Table 3 Statistical results of repetitive sequence classification
Class	RepeatMasker		RepeatProteinMask		RepeatModeler		Combined
	TEs		TEs		TEs		TEs
	Length	% in genome	Length	% in genome	Length	% in genome	Length	% in genome
	(bp)		(bp)		(bp)		(bp)
DNA	112451	0.33	114459	0.34	121082	0.36	189769	0.56
LINE	28851	0.09	19773	0.06	0	0	47510	0.14
SINE	543	0	0	0	0	0	543	0
LTR	188754	0.56	783061	2.31	285900	0.84	1020813	3.01
Unknown	6929	0.02	0	0	342190	1.01	349119	1.03
Other	19061	0.06	157986	0.47	7191	0.02	174298	0.51
Total	348750	1.03	1072954	3.17	755976	2.23	1727127	5.1
（1）RepeatMasker TEs：The transposon elements obtained from annotation genome sequence via RepeatMasker based on RepBase and the proportion of total transposon elements in genome.
（2）RepeatProteinMask TEs：The transposon elements obtained from annotation genome sequence via RepeatProteinMasker based on RepBase and the proportion of total transposon elements in genome.；
（3）RepeatModeler TEs：Use RepeatModeler to calculate the final sequence data file, and use it as an input file. And through the software to annotate the genomic repetitive sequence, calculate its total length and proportion in the genome.
（4）Combined TEs：The redundant repeats were excepted overlaps obtained from above three methods and the proportion of the total redundant repeats in the genome.；
Supplementary Table 3 DNA：DNA transposon；
（6）LINE：long interspersed nuclear elements
（7）SINE：short interspersed nuclear elements
（8）LTR：long terminal repeats
（9）Unknown：repeat sequence unclassfied by RepeatMasker；
（10）Other：repeat sequence classfied by RepeatMasker but uncategoried into transposon

## Sheet: S4
Supplementary Table 4 Basic statistical results of gene structure prediction
Gene set	Number of proteins	Average gene length (bp)	Average cds length (bp)	Average exons per gene	Average exon length (bp)	Average intron length (bp)
Augustus	11285	1730.56	1531.34	2.75	557.24	114.97
GeneMark	11004	1826	1485.26	3.17	468.44	157.98
SNAP	13491	1271.45	1141.77	2.41	474.57	93.24
FERA_1177	12187	1429.33	1304.56	2.54	513.65	82.06
SRC1lrK2f	12519	1425.61	1284.69	2.57	499.16	90.57
Z7	10682	1655.29	1458.31	2.85	511.18	107.33
EVM	11954	1657.71	1477.85	2.73	542.29	105.25
（1）Gene set：Source of specific gene prediction results, including tool species and related species names；
（2）Number of proteins： Number of predicted genes；
（3）Average gene length(bp)：Average length of predicted genes；
（4）Average cds length(bp)：
（5）Average exons per gene：
（6）Average exon length(bp)：
（7）Average intron length(bp)

## Sheet: S5
Supplementary Table 5 Statistical table of gene function annotation
Database	Count	Percentage(%)
BLASTP	7696	64.38
BLASTX	7525	62.95
GO	7875	65.88
KO	3543	29.64
Map	2207	18.46
NR	11943	99.91
NT	5993	50.13
PFAM	8213	68.71
eggNOG	1973	16.5
Total_anno	11947	99.94
Total_unigene	11954	100
(1) Blastp: the number and proportion of genes annotated into UniProt database by protein sequence;
(2) Blastx: the number and proportion of genes in UniProt database annotated by gene sequence;
(3) Go: the number and proportion of genes annotated into go database;
(4) Ko: the number and proportion of genes annotated to KEGG ID number;
(5) Map: the number and proportion of genes annotated to KEGG pathway;
(6) NR: the number and proportion of genes annotated into NR database;
(7) NT: the number and proportion of genes annotated into NT database;
(8) Pfam: the number and proportion of genes annotated into Pfam database;
(9) Eggnog: the number and proportion of genes annotated into the eggnog database;
（10）Total_ Anno: the number and proportion of genes that can be annotated in the above databases;
（11）Total_ UniGene: the total number and proportion of genes in gene structure annotation.

## Sheet: S6
Supplementary Table 6 statistical results of non coding RNA
Class	Type	Copy	Average length (bp)	Total length (bp)	% genome
miRNA	miRNA	2	90.5	181	0.00053
tRNA	tRNA	142	90.75	12887	0.03805
	18S	36	483.64	17411	0.05141
rRNA	28S	17	174.06	2959	0.00874
	5.8S	10	154	1540	0.00455
	5S	51	117.75	6005	0.01773
	CD-box	23	104.74	2409	0.00711
snRNA	HACA-box	2	155.5	311	0.00092
	splicing	10	137.3	1373	0.00405
(1) Class: the type name of ncRNA;
(2) Type: the taxonomic name of the ncRNA;
(3) Copy: to predict the copy number of a specific class of ncRNA in the whole genome;
(4) Average length (BP): predicted the average length of ncRNA in the whole genome;
(5) Total lengt (BP): the total RNA length of a specific class of ncRNA predicted in the whole genome;
(6) % of genome: the proportion of the total RNA length of a specific class of ncRNA in the whole genome.

## Sheet: S7
Supplementary Table 7 The annotation of all contigs.
Gene_ID	Prot_ID	Prot_Coords	NT_TopHit	NT_Score	NT_Evalue	NT_Description	NR_TopHit	NR_Score	NR_Evalue	NR_Description	PFAM_TopHit	PFAM_Name	PFAM_Description	eggNOG_TopHit	eggNOG_Description	GO_biological_process	GO_molecular_function	GO_cellular_component	KO	Map
evm.model.contig1.954	Protein.evm.model.contig1.954::evm.model.contig1.954	2330220-2331163[+]	gi|189200604|ref|XM_001936604.1|	534	E:4e-149	Pyrenophora tritici-repentis Pt-1C-BFP H/ACA ribonucleoprotein complex subunit 1, mRNA	RYN70107.1	194	E:2e-58	hypothetical protein AA0118_g113 [Alternaria tenuissima]	PF04410.14	Gar1	Gar1/Naf1 RNA binding region	COG3277	h aca RNA-protein complex component gar1	GO:0001522|pseudouridine synthesis;GO:0006364|rRNA processingGO:0001522|pseudouridine synthesis;GO:0042254|ribosome biogenesis	GO:0003723|RNA binding	GO:0005730|nucleolus	K11128|GAR1, NOLA1; H/ACA ribonucleoprotein complex subunit 1	map03008|Ribosome biogenesis in eukaryotes
evm.model.contig6.259	Protein.evm.model.contig6.259::evm.model.contig6.259	696777-697623[+]	gi|189195099|ref|XM_001933853.1|	377	E:7e-102	Pyrenophora tritici-repentis Pt-1C-BFP glutathione S-transferase, mRNA	OWY51204.1	505	E:9e-180	glutathione S-transferase [Alternaria alternata]	PF14497.6	GST_C_3	Glutathione S-transferase, C-terminal domain	ENOG4111VAU	glutathione Stransferase	GO:0006749|glutathione metabolic process;GO:0006805|xenobiotic metabolic process	GO:0004364|glutathione transferase activity	GO:0005737|cytoplasm	K00799|GST, gst; glutathione S-transferase [EC:2.5.1.18]	map05204|Chemical carcinogenesis;map00982|Drug metabolism - cytochrome P450;map00480|Glutathione metabolism;map00980|Metabolism of xenobiotics by cytochrome P450
evm.model.contig4.993	Protein.evm.model.contig4.993::evm.model.contig4.993	2661786-2664226[+]	gi|636598848|ref|XM_008032572.1|	337	E:3e-89	Setosphaeria turcica Et28A hypothetical protein mRNA	RYN87614.1	1085	E:0	hypothetical protein AA0120_g7385 [Alternaria tenuissima]	PF17907.1	AWS	AWS domain	COG2940	Histone-lysine N-methyltransferase	GO:0048096|chromatin-mediated maintenance of transcription;GO:0001700|embryonic development via the syncytial blastoderm;GO:0097676|histone H3-K36 dimethylation;GO:0010452|histone H3-K36 methylation;GO:0051568|histone H3-K4 methylation;GO:0051567|histone H3-K9 methylation;GO:0034770|histone H4-K20 methylation;GO:0016571|histone methylation;GO:0061086|negative regulation of histone H3-K27 methylat…	GO:0003682|chromatin binding;GO:0035035|histone acetyltransferase binding;GO:0042054|histone methyltransferase activity;GO:0046975|histone methyltransferase activity (H3-K36 specific);GO:0042800|histone methyltransferase activity (H3-K4 specific);GO:0042802|identical protein binding;GO:0046872|metal ion bindingGO:0018024|histone-lysine N-methyltransferase activity;GO:0005515|protein binding	GO:0000785|chromatin;GO:0035097|histone methyltransferase complex;GO:0005634|nucleus;GO:0005700|polytene chromosome;GO:0032991|protein-containing complexGO:0005634|nucleus	K06101|ASH1L; histone-lysine N-methyltransferase ASH1L [EC:2.1.1.43]	map04530|Tight junction;map00310|Lysine degradation
evm.model.contig2.1180	Protein.evm.model.contig2.1180::evm.model.contig2.1180	3022205-3023850[+]	gi|347300142|dbj|AB670702.1|	1009	E:0	Alternaria brassicicola IDO-gamma mRNA for indoleamine 2,3-dioxygenase gamma type, complete cds, strain: NBRC 31226	XP_018385783.1	872	E:0	hypothetical protein CC77DRAFT_990074 [Alternaria alternata]	PF01231.18	IDO	Indoleamine 2,3-dioxygenase	ENOG410XQHE	indoleamine 2,3-dioxygenase	GO:0034354|'de novo' NAD biosynthetic process from tryptophan;GO:0002534|cytokine production involved in inflammatory response;GO:0007565|female pregnancy;GO:0002376|immune system process;GO:0034276|kynurenic acid biosynthetic process;GO:0033555|multicellular organismal response to stress;GO:0032693|negative regulation of interleukin-10 production;GO:0070233|negative regulation of T cell apoptoti…	GO:0009055|electron transfer activity;GO:0020037|heme binding;GO:0033754|indoleamine 2,3-dioxygenase activity;GO:0046872|metal ion binding;GO:0004833|tryptophan 2,3-dioxygenase activityGO:0020037|heme binding	GO:0005737|cytoplasm;GO:0005829|cytosol;GO:0030485|smooth muscle contractile fiber;GO:0032421|stereocilium bundle	K00463|INDO; indoleamine 2,3-dioxygenase [EC:1.13.11.52]	map05143|African trypanosomiasis;map01100|Metabolic pathways;map00380|Tryptophan metabolism
evm.model.contig1.1080	Protein.evm.model.contig1.1080::evm.model.contig1.1080	2626691-2628663[+]	gi|189205173|ref|XM_001938887.1|	1448	E:0	Pyrenophora tritici-repentis Pt-1C-BFP ATP-dependent RNA helicase dbp2, mRNA	XP_028510505.1	858	E:0	ATP-dependent RNA helicase [Alternaria arborescens]	PF00270.29	DEAD	DEAD/DEAH box helicase	COG0513	purine NTP-dependent helicase activity	GO:0000184|nuclear-transcribed mRNA catabolic process, nonsense-mediated decay;GO:0006364|rRNA processing	GO:0005524|ATP binding;GO:0003723|RNA binding;GO:0003724|RNA helicase activityGO:0003676|nucleic acid binding;GO:0005524|ATP binding	GO:0005737|cytoplasm;GO:0005634|nucleus	K12823|DDX5, DBP2; ATP-dependent RNA helicase DDX5/DBP2 [EC:3.6.4.13]	map05205|Proteoglycans in cancer;map03040|Spliceosome;map05202|Transcriptional misregulation in cancer
evm.model.contig2.763	Protein.evm.model.contig2.763::evm.model.contig2.763	1924442-1926000[+]	gi|189188745|ref|XM_001930677.1|	905	E:0	Pyrenophora tritici-repentis Pt-1C-BFP excitatory amino acid transporter 1, mRNA	XP_018387931.1	815	E:0	Sodium:dicarboxylate symporter [Alternaria alternata]	PF00375.18	SDF	Sodium:dicarboxylate symporter family	COG1301	sodium dicarboxylate symporter	GO:0030534|adult behavior;GO:0098656|anion transmembrane transport;GO:0031668|cellular response to extracellular stimulus;GO:0070779|D-aspartate import across plasma membrane;GO:0098712|L-glutamate import across plasma membrane;GO:0015813|L-glutamate transmembrane transport;GO:0010259|multicellular organism aging;GO:0035264|multicellular organism growth;GO:0007399|nervous system development;GO:00…	GO:0008509|anion transmembrane transporter activity;GO:0015501|glutamate:sodium symporter activity;GO:0005314|high-affinity glutamate transmembrane transporter activity;GO:0005313|L-glutamate transmembrane transporter activity;GO:0046872|metal ion bindingGO:0015293|symporter activity	GO:0030673|axolemma;GO:0030424|axon;GO:0009986|cell surface;GO:0043198|dendritic shaft;GO:0043197|dendritic spine;GO:0098978|glutamatergic synapse;GO:0005887|integral component of plasma membrane;GO:0099056|integral component of presynaptic membrane;GO:0016020|membrane;GO:0043005|neuron projection;GO:0005886|plasma membrane;GO:0042734|presynaptic membrane;GO:0045202|synapseGO:0016021|integral com…	K05613|SLC1A2, EAAT2; solute carrier family 1 (glial high affinity glutamate transporter), member 2	map05014|Amyotrophic lateral sclerosis (ALS);map04724|Glutamatergic synapse
evm.model.contig4.1091	Protein.evm.model.contig4.1091::evm.model.contig4.1091	2885760-2888478[+]	gi|169595115|ref|XM_001790930.1|	525	E:5e-146	Phaeosphaeria nodorum SN15 hypothetical protein partial mRNA	RYN68259.1	1039	E:0	hypothetical protein AA0117_g11289 [Alternaria alternata]	PF00245.20	Alk_phosphatase	Alkaline phosphatase	COG1785	alkaline phosphatase	GO:0015628|protein secretion by the type II secretion system;GO:0043952|protein transport by the Sec complex	GO:0004035|alkaline phosphatase activity;GO:0046872|metal ion bindingGO:0016791|phosphatase activity	GO:0005576|extracellular region;GO:0042597|periplasmic space	K01077|E3.1.3.1, phoA, phoB; alkaline phosphatase [EC:3.1.3.1]	map02020|Two-component system;map00790|Folate biosynthesis;map01100|Metabolic pathways;map01120|Microbial metabolism in diverse environments;map00627|Aminobenzoate degradation
evm.model.contig1.1755	Protein.evm.model.contig1.1755::evm.model.contig1.1755	4403115-4404086[+]	gi|189209164|ref|XM_001940880.1|	340	E:1e-90	Pyrenophora tritici-repentis Pt-1C-BFP beta,beta-carotene 9',10'-dioxygenase, mRNA	RYO06101.1	471	E:1e-161	hypothetical protein AA0119_g2865 [Alternaria tenuissima]	PF03055.15	RPE65	Retinal pigment epithelial membrane protein	COG3670	dioxygenase	GO:0009926|auxin polar transport;GO:0016121|carotene catabolic process;GO:0009965|leaf morphogenesis;GO:0009733|response to auxin;GO:0010223|secondary shoot formation;GO:1901601|strigolactone biosynthetic process;GO:0016124|xanthophyll catabolic processGO:0055114|oxidation-reduction process	GO:0102396|9-cis-10'-apo-beta-carotenal cleavage oxygenase activity;GO:0102251|all-trans-beta-apo-10'-carotenal cleavage oxygenase activity;GO:0010436|carotenoid dioxygenase activity;GO:0046872|metal ion binding;GO:0016702|oxidoreductase activity, acting on single donors with incorporation of molecular oxygen, incorporation of two atoms of oxygenGO:0016702|oxidoreductase activity, acting on singl…	GO:0009570|chloroplast stroma	K17913|CCD8; carlactone synthase / all-trans-10'-apo-beta-carotenal 13,14-cleaving dioxygenase [EC:1.13.11.69 1.13.11.70]	map00906|Carotenoid biosynthesis
evm.model.contig3.459	Protein.evm.model.contig3.459::evm.model.contig3.459	1189035-1190518[+]	gi|189196405|ref|XM_001934506.1|	1016	E:0	Pyrenophora tritici-repentis Pt-1C-BFP non-specific lipid-transfer protein, mRNA	XP_018383717.1	824	E:0	non-specific lipid-transfer protein [Alternaria alternata]	PF00108.23	Thiolase_N	Thiolase, N-terminal domain	ENOG410XPRW	sterol carrier protein	GO:0006869|lipid transport	GO:0008289|lipid binding;GO:0033814|propanoyl-CoA C-acyltransferase activityGO:0016747|transferase activity, transferring acyl groups other than amino-acyl groups	GO:0005739|mitochondrion;GO:0005777|peroxisome	K08764|SCP2, SCPX; sterol carrier protein 2 [EC:2.3.1.176]	map01100|Metabolic pathways;map00120|Primary bile acid biosynthesis;map03320|PPAR signaling pathway;map04146|Peroxisome
evm.model.contig1.1132	Protein.evm.model.contig1.1132::evm.model.contig1.1132	2770559-2771430[+]	gi|628060870|ref|XM_007698166.1|	364	E:3e-98	Cochliobolus sativus ND90Pr hypothetical protein partial mRNA	XP_018389111.1	252	E:6e-82	trimethylguanosine synthase [Alternaria alternata]	PF02475.16	Met_10	Met-10+ like-protein	ENOG410XRUD	trimethylguanosine synthase	GO:0036261|7-methylguanosine cap hypermethylation;GO:0009452|7-methylguanosine RNA cappingGO:0001510|RNA methylation;GO:0009452|7-methylguanosine RNA capping	GO:0071164|RNA trimethylguanosine synthase activityGO:0008168|methyltransferase activity	GO:0015030|Cajal body;GO:0005829|cytosol;GO:0005730|nucleolus;GO:0005634|nucleus	K14292|TGS1; trimethylguanosine synthase [EC:2.1.1.-]	map03013|RNA transport
evm.model.contig3.836	Protein.evm.model.contig3.836::evm.model.contig3.836	2172101-2173319[+]	gi|189198967|ref|XM_001935786.1|	743	E:0	Pyrenophora tritici-repentis Pt-1C-BFP eukaryotic translation initiation factor 4E type 3-A, mRNA	RYN27791.1	699	E:0	hypothetical protein AA0115_g6517 [Alternaria tenuissima]	PF01652.18	IF4E	Eukaryotic initiation factor 4E	COG5053	eukaryotic translation initiation factor	GO:0006413|translational initiation	GO:0000340|RNA 7-methylguanosine cap binding;GO:0003743|translation initiation factor activityGO:0003723|RNA binding;GO:0003743|translation initiation factor activity	GO:0005829|cytosol;GO:0016281|eukaryotic translation initiation factor 4F complexGO:0005737|cytoplasm	K03259|EIF4E; translation initiation factor 4E	map04066|HIF-1 signaling pathway;map04150|mTOR signaling pathway;map04151|PI3K-Akt signaling pathway;map04910|Insulin signaling pathway;map03013|RNA transport
evm.model.contig4.852	Protein.evm.model.contig4.852::evm.model.contig4.852	2309286-2310653[-]	gi|953430978|ref|XM_014702075.1|	1345	E:0	Bipolaris victoriae FI3 hypothetical protein partial mRNA	XP_018391313.1	912	E:0	transcriptional repressor rco-1 [Alternaria alternata]	PF00400.32	WD40	WD domain, G-beta repeat	ENOG410XP87	cell division cycle 40 homolog (S. cerevisiae)	GO:0031124|mRNA 3'-end processing;GO:0006406|mRNA export from nucleus;GO:0000398|mRNA splicing, via spliceosome;GO:0006405|RNA export from nucleus	GO:0003723|RNA bindingGO:0005515|protein binding	GO:0071013|catalytic step 2 spliceosome;GO:0016607|nuclear speck;GO:0005654|nucleoplasm;GO:0005634|nucleus;GO:0071007|U2-type catalytic step 2 spliceosome	K12816|CDC40, PRP17; pre-mRNA-processing factor 17	map03040|Spliceosome
evm.model.contig4.862	Protein.evm.model.contig4.862::evm.model.contig4.862	2343607-2345872[+]	gi|189202561|ref|XM_001937582.1|	274	E:2e-70	Pyrenophora tritici-repentis Pt-1C-BFP cystinosin, mRNA	OWY41903.1	788	E:0	hypothetical protein AALT_g1656 [Alternaria alternata]	PF04193.14	PQ-loop	PQ loop repeat	ENOG410XQSD	cystinosin	GO:0015811|L-cystine transport;GO:0007040|lysosome organization;GO:0006909|phagocytosis	GO:0034639|L-amino acid efflux transmembrane transporter activity;GO:0015184|L-cystine transmembrane transporter activity	GO:0016021|integral component of membrane;GO:0005765|lysosomal membrane;GO:0005764|lysosome;GO:0045335|phagocytic vesicle;GO:0005774|vacuolar membrane	K12386|CTNS; cystinosin	map04142|Lysosome
evm.model.contig1.403	Protein.evm.model.contig1.403::evm.model.contig1.403	986244-989576[-]	gi|628060365|ref|XM_007698006.1|	237	E:3e-59	Cochliobolus sativus ND90Pr glycoside hydrolase family 47 protein mRNA	XP_018390176.1	535	E:3e-175	seven-hairpin glycosidase [Alternaria alternata]	PF01532.20	Glyco_hydro_47	Glycosyl hydrolase family 47	ENOG410XP04	Mannosidase alpha class	GO:1904380|endoplasmic reticulum mannose trimming;GO:1904382|mannose trimming involved in glycoprotein ERAD pathway;GO:0006491|N-glycan processing;GO:0009311|oligosaccharide metabolic process;GO:0036508|protein alpha-1,2-demannosylation;GO:0006486|protein glycosylation;GO:0036511|trimming of first mannose on A branch;GO:0036512|trimming of second mannose on A branch;GO:0036509|trimming of termina…	GO:0005509|calcium ion binding;GO:0004571|mannosyl-oligosaccharide 1,2-alpha-mannosidase activityGO:0004571|mannosyl-oligosaccharide 1,2-alpha-mannosidase activity;GO:0005509|calcium ion binding	GO:0005783|endoplasmic reticulum;GO:0005789|endoplasmic reticulum membrane;GO:0044322|endoplasmic reticulum quality control compartment;GO:1903561|extracellular vesicle;GO:0005794|Golgi apparatus;GO:0016021|integral component of membrane;GO:0016020|membraneGO:0016020|membrane	K01230|MAN1; mannosyl-oligosaccharide alpha-1,2-mannosidase [EC:3.2.1.113]	map04141|Protein processing in endoplasmic reticulum;map00513|Various types of N-glycan biosynthesis;map01100|Metabolic pathways;map00510|N-Glycan biosynthesis
evm.model.contig1.637	Protein.evm.model.contig1.637::evm.model.contig1.637	1570929-1572546[-]	gi|627821960|ref|XM_007685630.1|	377	E:1e-101	Bipolaris oryzae ATCC 44560 hypothetical protein partial mRNA	OWY44345.1	998	E:0	Prenylcysteine oxidase [Alternaria alternata]	PF13450.6	NAD_binding_8	NAD(P)-binding Rossmann-like domain	ENOG410Y3UN	Prenylcysteine oxidase 1	GO:0009738|abscisic acid-activated signaling pathway;GO:0045338|farnesyl diphosphate metabolic process;GO:0030327|prenylated protein catabolic process;GO:0030328|prenylcysteine catabolic processGO:0055114|oxidation-reduction process;GO:0030328|prenylcysteine catabolic process	GO:0102149|farnesylcysteine lyase activity;GO:0001735|prenylcysteine oxidase activityGO:0016491|oxidoreductase activity;GO:0016670|oxidoreductase activity, acting on a sulfur group of donors, oxygen as acceptor	GO:0005764|lysosome;GO:0005774|vacuolar membrane;GO:0005773|vacuole	K05906|PCYOX1, FCLY; prenylcysteine oxidase / farnesylcysteine lyase [EC:1.8.3.5 1.8.3.6]	map00900|Terpenoid backbone biosynthesis;map01130|Biosynthesis of antibiotics
evm.model.contig4.925	Protein.evm.model.contig4.925::evm.model.contig4.925	2495323-2497269[+]	gi|189202025|ref|XM_001937314.1|	1024	E:0	Pyrenophora tritici-repentis Pt-1C-BFP D-lactate dehydrogenase, mitochondrial precursor, mRNA	RYN31451.1	848	E:0	D-lactate dehydrogenase [cytochrome] [Alternaria arborescens]	PF01565.23	FAD_binding_4	FAD binding domain	COG0277	FAD linked oxidase domain protein	GO:1903457|lactate catabolic processGO:0055114|oxidation-reduction process	GO:0004458|D-lactate dehydrogenase (cytochrome) activity;GO:0071949|FAD bindingGO:0016491|oxidoreductase activity;GO:0050660|flavin adenine dinucleotide binding;GO:0003824|catalytic activity	GO:0005743|mitochondrial inner membrane;GO:0005759|mitochondrial matrix	K00102|dld, LDHD; D-lactate dehydrogenase (cytochrome) [EC:1.1.2.4]	map00620|Pyruvate metabolism
evm.model.contig1.1657	Protein.evm.model.contig1.1657::evm.model.contig1.1657	4130053-4131222[+]	gi|628181975|ref|XM_007708361.1|	335	E:6e-89	Bipolaris zeicola 26-R-13 hypothetical protein partial mRNA	XP_018383870.1	592	E:0	Thioesterase/thiol ester dehydrase-isomerase [Alternaria alternata]	PF13622.6	4HBT_3	Thioesterase-like superfamily	COG1946	acyl-CoA thioesterase	GO:0006637|acyl-CoA metabolic process;GO:0043649|dicarboxylic acid catabolic process;GO:0009062|fatty acid catabolic process;GO:0045225|negative regulation of CD4 biosynthetic process;GO:0016559|peroxisome fission	GO:0047603|acetoacetyl-CoA hydrolase activity;GO:0003986|acetyl-CoA hydrolase activity;GO:0047617|acyl-CoA hydrolase activity;GO:0052689|carboxylic ester hydrolase activity;GO:0033882|choloyl-CoA hydrolase activity;GO:0047994|hydroxymethylglutaryl-CoA hydrolase activity;GO:0052815|medium-chain acyl-CoA hydrolase activity;GO:0102991|myristoyl-CoA hydrolase activity;GO:0016290|palmitoyl-CoA hydrola…	GO:0005739|mitochondrion;GO:0005782|peroxisomal matrix;GO:0005777|peroxisome	K11992|ACOT8, PTE; acyl-CoA thioesterase 8 [EC:3.1.2.27]	map01100|Metabolic pathways;map00120|Primary bile acid biosynthesis;map04146|Peroxisome
evm.model.contig2.1783	Protein.evm.model.contig2.1783::evm.model.contig2.1783	4543879-4544931[-]	gi|628083905|ref|XM_007705613.1|	446	E:2e-122	Cochliobolus sativus ND90Pr glycosyltransferase family 8 protein partial mRNA	XP_018383395.1	464	E:4e-163	glycosyl transferase family protein-like protein [Alternaria alternata]	PF01501.20	Glyco_transf_8	Glycosyl transferase family 8	COG5597	Glycosyl Transferase	GO:0006012|galactose metabolic process;GO:0006979|response to oxidative stress	GO:0015020|glucuronosyltransferase activity;GO:0047216|inositol 3-alpha-galactosyltransferase activity;GO:0046872|metal ion bindingGO:0016757|transferase activity, transferring glycosyl groups	GO:0005794|Golgi apparatus	K18819|GOLS; inositol 3-alpha-galactosyltransferase [EC:2.4.1.123]	map00052|Galactose metabolism
evm.model.contig6.400	Protein.evm.model.contig6.400::evm.model.contig6.400	1071785-1072378[+]	gi|928523395|ref|XM_014225020.1|	355	E:2e-95	Bipolaris maydis ATCC 48331 hypothetical protein partial mRNA	XP_028507736.1	274	E:8e-88	Serine/threonine-protein phosphatase T [Alternaria arborescens]	PF08321.12	PPP5	PPP5 TPR repeat region	COG0639	serine threonine-protein phosphatase	GO:0071276|cellular response to cadmium ion;GO:0070301|cellular response to hydrogen peroxide;GO:0016576|histone dephosphorylation;GO:0060548|negative regulation of cell death;GO:1901215|negative regulation of neuron death;GO:0001933|negative regulation of protein phosphorylation;GO:2000324|positive regulation of glucocorticoid receptor signaling pathway;GO:0051259|protein complex oligomerization…	GO:0043531|ADP binding;GO:0005524|ATP binding;GO:0001965|G-protein alpha-subunit binding;GO:0031072|heat shock protein binding;GO:0051879|Hsp90 protein binding;GO:0042802|identical protein binding;GO:0046872|metal ion binding;GO:0008017|microtubule binding;GO:0004721|phosphoprotein phosphatase activity;GO:0004722|protein serine/threonine phosphatase activity;GO:0003723|RNA binding	GO:0071944|cell periphery;GO:0101031|chaperone complex;GO:0005737|cytoplasm;GO:0005829|cytosol;GO:0043005|neuron projection;GO:0043025|neuronal cell body;GO:0005634|nucleus;GO:0043204|perikaryon;GO:0005886|plasma membrane;GO:1990635|proximal dendrite	K04460|PPP5C; serine/threonine-protein phosphatase 5 [EC:3.1.3.16]	map04010|MAPK signaling pathway
evm.model.contig5.773	Protein.evm.model.contig5.773::evm.model.contig5.773	2048528-2049035[+]	gi|628195798|ref|XM_007711481.1|	331	E:3e-88	Bipolaris zeicola 26-R-13 hypothetical protein partial mRNA	RYN56643.1	196	E:2e-55	Pre-mRNA-splicing factor [Alternaria tenuissima]	PF16004.5	EFTUD2	116 kDa U5 small nuclear ribonucleoprotein component N-terminus	COG0480	Catalyzes the GTP-dependent ribosomal translocation step during translation elongation. During this step, the ribosome changes from the pre-translocational (PRE) to the post- translocational (POST) state as the newly formed A-site-bound peptidyl-tRNA and P-site-bound deacylated tRNA move to the P and E sites, respectively. Catalyzes the coordinated movement of the two tRNA molecules, the mRNA and…	GO:0000398|mRNA splicing, via spliceosome	GO:0005525|GTP binding;GO:0003924|GTPase activity;GO:0030623|U5 snRNA bindingGO:0003924|GTPase activity;GO:0005525|GTP binding	GO:0005829|cytosol;GO:0005634|nucleus;GO:1990904|ribonucleoprotein complex;GO:0071007|U2-type catalytic step 2 spliceosome;GO:0071005|U2-type precatalytic spliceosome;GO:0046540|U4/U6 x U5 tri-snRNP complex	K12852|EFTUD2; 116 kDa U5 small nuclear ribonucleoprotein component	map03040|Spliceosome
evm.model.contig5.213	Protein.evm.model.contig5.213::evm.model.contig5.213	623022-623267[+]	gi|702066580|emb|FO905660.1|	128	E:2e-27	Leptosphaeria biglobosa brassicae b35_scaffold00004 complete sequence	XP_028508373.1	85.9	E:7e-19	hypothetical protein AA0111_g3738 [Alternaria arborescens]	PF00692.19	dUTPase	dUTPase	COG0756	This enzyme is involved in nucleotide metabolism it produces dUMP, the immediate precursor of thymidine nucleotides and it decreases the intracellular concentration of dUTP so that uracil cannot be incorporated into DNA (By similarity)	GO:0006281|DNA repair;GO:0006226|dUMP biosynthetic process;GO:0046081|dUTP catabolic process	GO:0004170|dUTP diphosphatase activity;GO:0042802|identical protein binding;GO:0000287|magnesium ion binding	GO:0005829|cytosol	K01520|dut, DUT; dUTP pyrophosphatase [EC:3.6.1.23]	map01100|Metabolic pathways;map00240|Pyrimidine metabolism
evm.model.contig2.1423	Protein.evm.model.contig2.1423::evm.model.contig2.1423	3616477-3619906[+]	gi|636588346|ref|XM_008027321.1|	586	E:4e-164	Setosphaeria turcica Et28A hypothetical protein mRNA	XP_018385525.1	1329	E:0	gephyrin [Alternaria alternata]	PF00137.21	ATP-synt_C	ATP synthase subunit C	COG0303	Molybdenum cofactor synthesis domain protein	GO:0007529|establishment of synaptic specificity at neuromuscular junction;GO:0097112|gamma-aminobutyric acid receptor clustering;GO:0072579|glycine receptor clustering;GO:0006777|Mo-molybdopterin cofactor biosynthetic process;GO:0018315|molybdenum incorporation into molybdenum-molybdopterin complex;GO:0032324|molybdopterin cofactor biosynthetic process;GO:0098970|postsynaptic neurotransmitter re…	GO:0005524|ATP binding;GO:0046872|metal ion binding;GO:0061598|molybdopterin adenylyltransferase activity;GO:0043546|molybdopterin cofactor binding;GO:0061599|molybdopterin molybdotransferase activity;GO:0008940|nitrate reductase activityGO:0015078|proton transmembrane transporter activity	GO:0030054|cell junction;GO:0005737|cytoplasm;GO:0005856|cytoskeleton;GO:0005829|cytosol;GO:0030425|dendrite;GO:0005886|plasma membrane;GO:0014069|postsynaptic density;GO:0045211|postsynaptic membrane;GO:0099572|postsynaptic specialization;GO:0099634|postsynaptic specialization membraneGO:0033177|proton-transporting two-sector ATPase complex, proton-transporting domain	K15376|GPHN; gephyrin [EC:2.10.1.1 2.7.7.75]	map04727|GABAergic synapse
evm.model.contig1.1648	Protein.evm.model.contig1.1648::evm.model.contig1.1648	4096681-4097615[+]	gi|189208389|ref|XM_001940493.1|	270	E:1e-69	Pyrenophora tritici-repentis Pt-1C-BFP endoglucanase IV precursor, mRNA	XP_018383859.1	345	E:4e-117	glycoside hydrolase [Alternaria alternata]	PF03443.14	Glyco_hydro_61	Glycosyl hydrolase family 61	ENOG410YBW9	endo-glucanase	GO:0030245|cellulose catabolic process	GO:0030248|cellulose binding;GO:0016798|hydrolase activity, acting on glycosyl bonds;GO:0016491|oxidoreductase activity	GO:0005576|extracellular region	K19356|EGLD; cellulase [EC:3.2.1.4]	map01100|Metabolic pathways;map00500|Starch and sucrose metabolism
evm.model.contig1.1532	Protein.evm.model.contig1.1532::evm.model.contig1.1532	3737911-3739654[+]	gi|259480592|tpe|BN001302.1|	91.6	E:2e-15	TPA_asm: Aspergillus nidulans FGSC A4 chromosome II	RII06767.1	1075	E:0	class I alpha-mannosidase [Alternaria sp. MG1]	PF01532.20	Glyco_hydro_47	Glycosyl hydrolase family 47	ENOG410XP04	Mannosidase alpha class	GO:1904381|Golgi apparatus mannose trimming;GO:0048286|lung alveolus development;GO:0006491|N-glycan processing;GO:0006486|protein glycosylation;GO:0007585|respiratory gaseous exchange by respiratory system	GO:0005509|calcium ion binding;GO:0004571|mannosyl-oligosaccharide 1,2-alpha-mannosidase activityGO:0004571|mannosyl-oligosaccharide 1,2-alpha-mannosidase activity;GO:0005509|calcium ion binding	GO:0005783|endoplasmic reticulum;GO:0070062|extracellular exosome;GO:0005794|Golgi apparatus;GO:0000139|Golgi membrane;GO:0016021|integral component of membrane;GO:0016020|membraneGO:0016020|membrane	K01230|MAN1; mannosyl-oligosaccharide alpha-1,2-mannosidase [EC:3.2.1.113]	map04141|Protein processing in endoplasmic reticulum;map00513|Various types of N-glycan biosynthesis;map01100|Metabolic pathways;map00510|N-Glycan biosynthesis
evm.model.contig2.57	Protein.evm.model.contig2.57::evm.model.contig2.57	197299-198798[-]	gi|189191255|ref|XM_001931932.1|	470	E:2e-129	Pyrenophora tritici-repentis Pt-1C-BFP oxalate decarboxylase oxdD, mRNA	XP_018384253.1	818	E:0	Bicupin, oxalate decarboxylase/oxidase [Alternaria alternata]	PF00190.22	Cupin_1	Cupin	COG2140	Oxalate decarboxylase	GO:0033609|oxalate metabolic processGO:0005976|polysaccharide metabolic process	GO:0046872|metal ion binding;GO:0045735|nutrient reservoir activity;GO:0046564|oxalate decarboxylase activityGO:0045735|nutrient reservoir activity;GO:0016779|nucleotidyltransferase activity	GO:0005737|cytoplasm	K01569|oxdD; oxalate decarboxylase [EC:4.1.1.2]	map01100|Metabolic pathways;map00630|Glyoxylate and dicarboxylate metabolism
evm.model.contig7.818	Protein.evm.model.contig7.818::evm.model.contig7.818	2076002-2079896[-]	gi|189205508|ref|XM_001939054.1|	248	E:1e-62	Pyrenophora tritici-repentis Pt-1C-BFP 60S ribosomal protein L36, partial mRNA	RYN52907.1	721	E:0	putative 4-coumarate--CoA ligase 1 [Alternaria tenuissima]	PF00501.28	AMP-binding	AMP-binding enzyme	COG0318	Amp-dependent synthetase and ligase	GO:0009698|phenylpropanoid metabolic processGO:0006412|translation	GO:0016207|4-coumarate-CoA ligase activity;GO:0005524|ATP bindingGO:0003824|catalytic activity;GO:0003735|structural constituent of ribosome	GO:0005622|intracellular;GO:0005840|ribosome	K01904|4CL; 4-coumarate--CoA ligase [EC:6.2.1.12]	map00130|Ubiquinone and other terpenoid-quinone biosynthesis;map01110|Biosynthesis of secondary metabolites;map01100|Metabolic pathways;map00940|Phenylpropanoid biosynthesis;map00360|Phenylalanine metabolism
evm.model.contig6.633	Protein.evm.model.contig6.633::evm.model.contig6.633	1658774-1659540[+]	gi|189197850|ref|XM_001935228.1|	340	E:5e-91	Pyrenophora tritici-repentis Pt-1C-BFP hypothetical protein, mRNA	RYN31665.1	178	E:1e-54	hypothetical protein AA0115_g4035 [Alternaria tenuissima]	PF01423.22	LSM	LSM domain	ENOG4111TZU	U6 snRNA-associated Sm-like protein	GO:0033962|cytoplasmic mRNA processing body assembly;GO:0000398|mRNA splicing, via spliceosome;GO:0000956|nuclear-transcribed mRNA catabolic process;GO:0000387|spliceosomal snRNP assembly	GO:0042731|PH domain binding;GO:0003723|RNA binding;GO:0017070|U6 snRNA binding	GO:0005737|cytoplasm;GO:0005829|cytosol;GO:0120115|Lsm2-8 complex;GO:0016020|membrane;GO:0043005|neuron projection;GO:0005654|nucleoplasm;GO:0005634|nucleus;GO:0000932|P-body;GO:0032991|protein-containing complex;GO:0005681|spliceosomal complex;GO:0071005|U2-type precatalytic spliceosome;GO:0046540|U4/U6 x U5 tri-snRNP complex;GO:0005688|U6 snRNP	K12623|LSM4; U6 snRNA-associated Sm-like protein LSm4	map03040|Spliceosome;map03018|RNA degradation
evm.model.contig9.493	Protein.evm.model.contig9.493::evm.model.contig9.493	1335937-1336485[+]	gi|189192149|ref|XM_001932379.1|	241	E:4e-61	Pyrenophora tritici-repentis Pt-1C-BFP hypothetical protein, mRNA	OWY51700.1	238	E:2e-78	ubiquinol-cytochrome c reductase complex 7.3 kda protein-like protein [Alternaria alternata]	PF05365.12	UCR_UQCRX_QCR9	Ubiquinol-cytochrome C reductase, UQCRX/QCR9 like	ENOG4112909	Ubiquinol--cytochrome c reductase	GO:0009060|aerobic respiration;GO:0006122|mitochondrial electron transport, ubiquinol to cytochrome c;GO:0034551|mitochondrial respiratory chain complex III assemblyGO:0006122|mitochondrial electron transport, ubiquinol to cytochrome c	GO:0008121|ubiquinol-cytochrome-c reductase activity	GO:0016021|integral component of membrane;GO:0005750|mitochondrial respiratory chain complex IIIGO:0005743|mitochondrial inner membrane;GO:0005750|mitochondrial respiratory chain complex III	K00419|QCR9, UCRC; ubiquinol-cytochrome c reductase subunit 9	map00190|Oxidative phosphorylation;map04260|Cardiac muscle contraction;map05012|Parkinson's disease;map05016|Huntington's disease;map05010|Alzheimer's disease;map01100|Metabolic pathways;map04932|Non-alcoholic fatty liver disease (NAFLD)
evm.model.contig4.47	Protein.evm.model.contig4.47::evm.model.contig4.47	128448-129499[-]	gi|628068606|ref|XM_007700767.1|	464	E:6e-128	Cochliobolus sativus ND90Pr hypothetical protein mRNA	RYN41563.1	543	E:0	hypothetical protein AA0114_g10743 [Alternaria tenuissima]	PF00248.21	Aldo_ket_red	Aldo/keto reductase family	COG0667	Aldo keto reductase	GO:0044597|daunorubicin metabolic process;GO:0044598|doxorubicin metabolic process	GO:0004032|alditol:NADP+ 1-oxidoreductase activity;GO:0019119|phenanthrene-9,10-epoxide hydrolase activity	GO:0005737|cytoplasm;GO:0005829|cytosol;GO:0005794|Golgi apparatus;GO:0005739|mitochondrion;GO:0005635|nuclear envelope	K15303|AKR7; aflatoxin B1 aldehyde reductase	map00980|Metabolism of xenobiotics by cytochrome P450
evm.model.contig9.222	Protein.evm.model.contig9.222::evm.model.contig9.222	575137-577298[+]	gi|189192471|ref|XM_001932540.1|	1120	E:0	Pyrenophora tritici-repentis Pt-1C-BFP isovaleryl-CoA dehydrogenase, mitochondrial precursor, mRNA	XP_018381939.1	1001	E:0	hypothetical protein CC77DRAFT_1043293 [Alternaria alternata]	PF02627.20	CMD	Carboxymuconolactone decarboxylase family	ENOG410XNMY	Dehydrogenase	GO:0006552|leucine catabolic processGO:0055114|oxidation-reduction process	GO:0050660|flavin adenine dinucleotide binding;GO:0008470|isovaleryl-CoA dehydrogenase activityGO:0051920|peroxiredoxin activity;GO:0016627|oxidoreductase activity, acting on the CH-CH group of donors;GO:0050660|flavin adenine dinucleotide binding	GO:0005739|mitochondrion	K00253|IVD, ivd; isovaleryl-CoA dehydrogenase [EC:1.3.8.4]	map00280|Valine, leucine and isoleucine degradation;map01100|Metabolic pathways;map01200|Carbon metabolism;map00281|Geraniol degradation;map01212|Fatty acid metabolism;map00650|Butanoate metabolism;map00071|Fatty acid degradation;map01110|Biosynthesis of secondary metabolites
evm.model.contig2.114	Protein.evm.model.contig2.114::evm.model.contig2.114	357984-359342[-]	gi|189190795|ref|XM_001931702.1|	832	E:0	Pyrenophora tritici-repentis Pt-1C-BFP aminotransferase, mRNA	XP_028501296.1	600	E:0	hypothetical protein AA0111_g11145 [Alternaria arborescens]	PF00155.21	Aminotran_1_2	Aminotransferase class I and II	COG0436	aminotransferase	GO:0009058|biosynthetic processGO:0009058|biosynthetic process	GO:0004069|L-aspartate:2-oxoglutarate aminotransferase activity;GO:0030170|pyridoxal phosphate bindingGO:0030170|pyridoxal phosphate binding	GO:0005737|cytoplasm	K00812|aspB; aspartate aminotransferase [EC:2.6.1.1]	map00350|Tyrosine metabolism;map01210|2-Oxocarboxylic acid metabolism;map01230|Biosynthesis of amino acids;map00250|Alanine, aspartate and glutamate metabolism;map00950|Isoquinoline alkaloid biosynthesis;map00400|Phenylalanine, tyrosine and tryptophan biosynthesis;map00401|Novobiocin biosynthesis;map00330|Arginine and proline metabolism;map00960|Tropane, piperidine and pyridine alkaloid biosynthe…
evm.model.contig1.1537	Protein.evm.model.contig1.1537::evm.model.contig1.1537	3751530-3752297[-]	gi|189210618|ref|XM_001941606.1|	699	E:0	Pyrenophora tritici-repentis Pt-1C-BFP triosephosphate isomerase 2, mRNA	XP_018389521.1	484	E:1e-171	Triosephosphate isomerase [Alternaria alternata]	PF00121.18	TIM	Triosephosphate isomerase	COG0042	Catalyzes the synthesis of dihydrouridine a modified base found in the D-loop of most tRNAs (By similarity)	GO:0006094|gluconeogenesis;GO:0006096|glycolytic process	GO:0004807|triose-phosphate isomerase activityGO:0004807|triose-phosphate isomerase activity	GO:0005737|cytoplasm	K01803|TPI, tpiA; triosephosphate isomerase (TIM) [EC:5.3.1.1]	map00562|Inositol phosphate metabolism;map01200|Carbon metabolism;map01230|Biosynthesis of amino acids;map00010|Glycolysis / Gluconeogenesis;map00710|Carbon fixation in photosynthetic organisms;map01110|Biosynthesis of secondary metabolites;map00051|Fructose and mannose metabolism;map01100|Metabolic pathways;map01120|Microbial metabolism in diverse environments;map01130|Biosynthesis of antibiotics
evm.model.contig9.645	Protein.evm.model.contig9.645::evm.model.contig9.645	1713924-1714671[-]	gi|636591500|ref|XM_008028898.1|	542	E:1e-151	Setosphaeria turcica Et28A hypothetical protein mRNA	XP_018380238.1	254	E:8e-84	RNA-binding domain-containing protein [Alternaria alternata]	PF13893.6	RRM_5	RNA recognition motif. (a.k.a. RRM, RBD, or RNP domain)	ENOG4111IHX	premRNA branch site protein	GO:0000398|mRNA splicing, via spliceosome	GO:0003723|RNA bindingGO:0003676|nucleic acid binding	GO:0071013|catalytic step 2 spliceosome;GO:0005686|U2 snRNP	K12833|SF3B14; pre-mRNA branch site protein p14	map03040|Spliceosome
evm.model.contig4.275	Protein.evm.model.contig4.275::evm.model.contig4.275	800357-803165[-]	gi|302696336|ref|XM_003037801.1|	89.8	E:1e-14	Schizophyllum commune H4-8 hypothetical protein, mRNA	RYN85838.1	1363	E:0	hypothetical protein AA0119_g13071 [Alternaria tenuissima]	PF00179.26	UQ_con	Ubiquitin-conjugating enzyme	ENOG410XP8C	ubiquitin-conjugating enzyme	GO:0006915|apoptotic process;GO:0007049|cell cycle;GO:0051301|cell division;GO:0060711|labyrinthine layer development;GO:0043066|negative regulation of apoptotic process;GO:2001237|negative regulation of extrinsic apoptotic signaling pathway;GO:0008284|positive regulation of cell population proliferation;GO:0006468|protein phosphorylation;GO:0016567|protein ubiquitination;GO:0042127|regulation of…	GO:0004869|cysteine-type endopeptidase inhibitor activity;GO:0061631|ubiquitin conjugating enzyme activity;GO:0004842|ubiquitin-protein transferase activity	GO:0005768|endosome;GO:0090543|Flemming body;GO:0016020|membrane;GO:0005815|microtubule organizing center;GO:0030496|midbody;GO:0005634|nucleus;GO:0000922|spindle pole;GO:0005802|trans-Golgi network	K10586|BIRC6, BRUCE; baculoviral IAP repeat-containing protein 6 (apollon) [EC:2.3.2.23]	map04120|Ubiquitin mediated proteolysis
evm.model.contig6.758	Protein.evm.model.contig6.758::evm.model.contig6.758	2003094-2006755[+]	gi|681099175|emb|FO904940.1|	183	E:5e-43	Podospora anserina genomic DNA, chromosome 5	OWY49236.1	1228	E:0	acetyl-CoA synthetase-like protein [Alternaria alternata]	PF09248.10	DUF1965	Domain of unknown function (DUF1965)	COG3733	amine oxidase	GO:0007568|aging;GO:0009308|amine metabolic process;GO:0007155|cell adhesion;GO:0042755|eating behavior;GO:0002523|leukocyte migration involved in inflammatory response;GO:1902283|negative regulation of primary amine oxidase activity;GO:0002675|positive regulation of acute inflammatory response;GO:0010828|positive regulation of glucose transmembrane transport;GO:0002687|positive regulation of leu…	GO:0052595|aliphatic-amine oxidase activity;GO:0052594|aminoacetone:oxygen oxidoreductase(deaminating) activity;GO:0005507|copper ion binding;GO:0052596|phenethylamine:oxygen oxidoreductase (deaminating) activity;GO:0008131|primary amine oxidase activity;GO:0042803|protein homodimerization activity;GO:0048038|quinone binding;GO:0052593|tryptamine:oxygen oxidoreductase (deaminating) activityGO:000…	GO:0009986|cell surface;GO:0005769|early endosome;GO:0005783|endoplasmic reticulum;GO:0005615|extracellular space;GO:0005794|Golgi apparatus;GO:0016021|integral component of membrane;GO:0043231|intracellular membrane-bounded organelle;GO:0005886|plasma membrane	K00276|AOC3, AOC2, tynA; primary-amine oxidase [EC:1.4.3.21]	map00950|Isoquinoline alkaloid biosynthesis;map00960|Tropane, piperidine and pyridine alkaloid biosynthesis;map00260|Glycine, serine and threonine metabolism;map01110|Biosynthesis of secondary metabolites;map01100|Metabolic pathways;map00410|beta-Alanine metabolism;map00350|Tyrosine metabolism;map00360|Phenylalanine metabolism
evm.model.contig2.303	Protein.evm.model.contig2.303::evm.model.contig2.303	884745-886697[+]	gi|627826843|ref|XM_007687319.1|	470	E:3e-129	Bipolaris oryzae ATCC 44560 glycoside hydrolase family 20 protein partial mRNA	RYN89519.1	1250	E:0	Beta-hexosaminidase [Alternaria tenuissima]	PF14845.6	Glycohydro_20b2	beta-acetyl hexosaminidase like	COG3525	ec 3.2.1.52	GO:0005975|carbohydrate metabolic processGO:0005975|carbohydrate metabolic process	GO:0004563|beta-N-acetylhexosaminidase activity;GO:0102148|N-acetyl-beta-D-galactosaminidase activityGO:0004553|hydrolase activity, hydrolyzing O-glycosyl compounds	GO:0005576|extracellular region	K12373|HEXA_B; hexosaminidase [EC:3.2.1.52]	map04142|Lysosome;map00511|Other glycan degradation;map00531|Glycosaminoglycan degradation;map00604|Glycosphingolipid biosynthesis - ganglio series;map00520|Amino sugar and nucleotide sugar metabolism;map01100|Metabolic pathways;map00603|Glycosphingolipid biosynthesis - globo series
evm.model.contig1.1120	Protein.evm.model.contig1.1120::evm.model.contig1.1120	2731307-2736721[-]	gi|189200786|ref|XM_001936695.1|	518	E:2e-143	Pyrenophora tritici-repentis Pt-1C-BFP ATP-dependent DNA helicase hus2/rqh1, mRNA	RYO25093.1	673	E:0	ATP-dependent DNA helicase hus2/rqh1 [Alternaria tenuissima]	PF00271.31	Helicase_C	Helicase conserved C-terminal domain	COG0514	atp-dependent dna helicase	GO:0071215|cellular response to abscisic acid stimulus;GO:0070417|cellular response to cold;GO:0006974|cellular response to DNA damage stimulus;GO:0051276|chromosome organization;GO:0032508|DNA duplex unwinding;GO:0006310|DNA recombination;GO:0006281|DNA repair;GO:0006268|DNA unwinding involved in DNA replication;GO:0000724|double-strand break repair via homologous recombination	GO:0043138|3'-5' DNA helicase activity;GO:0005524|ATP binding;GO:0009378|four-way junction helicase activity;GO:0046872|metal ion binding;GO:0003676|nucleic acid bindingGO:0003676|nucleic acid binding	GO:0005694|chromosome;GO:0005737|cytoplasm;GO:0005634|nucleus;GO:0009506|plasmodesmaGO:0005622|intracellular	K10901|BLM, RECQL3, SGS1; bloom syndrome protein [EC:3.6.4.12]	map03440|Homologous recombination;map03460|Fanconi anemia pathway
evm.model.contig4.806	Protein.evm.model.contig4.806::evm.model.contig4.806	2202659-2203767[+]	gi|189201987|ref|XM_001937295.1|	785	E:0	Pyrenophora tritici-repentis Pt-1C-BFP S-formylglutathione hydrolase, mRNA	RYO41704.1	504	E:1e-178	S-formylglutathione hydrolase [Alternaria gaisen]	PF00756.20	Esterase	Putative esterase	COG0627	esterase	GO:0046294|formaldehyde catabolic processGO:0006508|proteolysis	GO:0052689|carboxylic ester hydrolase activity;GO:0018738|S-formylglutathione hydrolase activityGO:0008236|serine-type peptidase activity	GO:0031410|cytoplasmic vesicle;GO:0005829|cytosol	K01070|frmB, ESD, fghA; S-formylglutathione hydrolase [EC:3.1.2.12]	map01200|Carbon metabolism;map01120|Microbial metabolism in diverse environments;map00680|Methane metabolism
evm.model.contig3.805	Protein.evm.model.contig3.805::evm.model.contig3.805	2089747-2091768[+]	gi|636747530|ref|XM_008077748.1|	167	E:3e-38	Glarea lozoyensis ATCC 20868 PLC-like phosphodiesterase mRNA	XP_018388596.1	710	E:0	PLC-like phosphodiesterase [Alternaria alternata]	PF00388.19	PI-PLC-X	Phosphatidylinositol-specific phospholipase C, X domain	ENOG410XPSW	phospholipase c	GO:0006816|calcium ion transport;GO:0032959|inositol trisphosphate biosynthetic process;GO:0035556|intracellular signal transduction;GO:0016042|lipid catabolic process;GO:0007275|multicellular organism development;GO:0060470|positive regulation of cytosolic calcium ion concentration involved in egg activationGO:0006629|lipid metabolic process;GO:0007165|signal transduction;GO:0035556|intracellula…	GO:0004435|phosphatidylinositol phospholipase C activity;GO:0032266|phosphatidylinositol-3-phosphate binding;GO:0005546|phosphatidylinositol-4,5-bisphosphate binding;GO:0010314|phosphatidylinositol-5-phosphate bindingGO:0004435|phosphatidylinositol phospholipase C activity	GO:0005829|cytosol;GO:0005730|nucleolus;GO:0005654|nucleoplasm;GO:0005634|nucleus;GO:0048471|perinuclear region of cytoplasm;GO:0045120|pronucleus;GO:0061827|sperm head	K05861|PLCZ; phosphatidylinositol phospholipase C, zeta [EC:3.1.4.11]	map00562|Inositol phosphate metabolism;map04070|Phosphatidylinositol signaling system;map04020|Calcium signaling pathway;map04919|Thyroid hormone signaling pathway;map04114|Oocyte meiosis;map01100|Metabolic pathways
evm.model.contig9.280	Protein.evm.model.contig9.280::evm.model.contig9.280	733955-735097[-]	gi|627818626|ref|XM_007683963.1|	492	E:3e-136	Bipolaris oryzae ATCC 44560 hypothetical protein partial mRNA	RYN37646.1	613	E:0	hypothetical protein AA0115_g1165 [Alternaria tenuissima]	PF00107.26	ADH_zinc_N	Zinc-binding dehydrogenase	COG0604	alcohol dehydrogenase	GO:0006739|NADP metabolic process;GO:0042981|regulation of apoptotic processGO:0055114|oxidation-reduction process	GO:0070402|NADPH binding;GO:0003960|NADPH:quinone reductase activity;GO:0042803|protein homodimerization activity;GO:0048038|quinone binding	GO:0005829|cytosol	K10133|TP53I3; tumor protein p53-inducible protein 3 [EC:1.-.-.-]	map04115|p53 signaling pathway
evm.model.contig10.46	Protein.evm.model.contig10.46::evm.model.contig10.46	104855-105043[+]	gi|169608304|ref|XM_001797520.1|	176	E:6e-42	Phaeosphaeria nodorum SN15 hypothetical protein partial mRNA	RYN63608.1	91.7	E:7e-23	hypothetical protein AA0118_g4369 [Alternaria tenuissima]	PF03604.13	DNA_RNApol_7kD	DNA directed RNA polymerase, 7 kDa subunit	COG1996	DNA-dependent RNA polymerase catalyzes the transcription of DNA into RNA using the four ribonucleoside triphosphates as substrates	GO:0006360|transcription by RNA polymerase I;GO:0006366|transcription by RNA polymerase II;GO:0006383|transcription by RNA polymerase IIIGO:0006351|transcription, DNA-templated	GO:0003677|DNA binding;GO:0003899|DNA-directed 5'-3' RNA polymerase activity;GO:0008270|zinc ion bindingGO:0003677|DNA binding;GO:0003899|DNA-directed 5'-3' RNA polymerase activity	GO:0005736|RNA polymerase I complex;GO:0005665|RNA polymerase II, core complex;GO:0005666|RNA polymerase III complex;GO:0000418|RNA polymerase IV complex;GO:0000419|RNA polymerase V complex	K03009|RPB12, POLR2K; DNA-directed RNA polymerases I, II, and III subunit RPABC4	map03020|RNA polymerase;map04623|Cytosolic DNA-sensing pathway;map00240|Pyrimidine metabolism;map05169|Epstein-Barr virus infection;map01100|Metabolic pathways;map05016|Huntington's disease;map00230|Purine metabolism
evm.model.contig7.951	Protein.evm.model.contig7.951::evm.model.contig7.951	2408428-2413407[+]	gi|189193502|ref|XM_001933055.1|	501	E:2e-138	Pyrenophora tritici-repentis Pt-1C-BFP nod factor export ATP-binding protein I, mRNA	OWY47767.1	2712	E:0	P-loop containing nucleoside triphosphate hydrolase protein [Alternaria alternata]	PF12698.7	ABC2_membrane_3	ABC-2 family transporter protein	COG1131	(ABC) transporter	GO:0006869|lipid transport;GO:0031288|sorocarp morphogenesis	GO:0005524|ATP binding;GO:0016887|ATPase activity;GO:0042626|ATPase-coupled transmembrane transporter activity;GO:0005319|lipid transporter activityGO:0005524|ATP binding;GO:0016887|ATPase activity	GO:0016021|integral component of membrane;GO:0043231|intracellular membrane-bounded organelle	K05643|ABCA3; ATP-binding cassette, subfamily A (ABC1), member 3	map02010|ABC transporters
evm.model.contig8.500	Protein.evm.model.contig8.500::evm.model.contig8.500	1454142-1454804[+]	gi|636580652|ref|XM_008023474.1|	682	E:0	Setosphaeria turcica Et28A hypothetical protein mRNA	XP_018390723.1	295	E:4e-99	actin-related protein 2/3 complex subunit 4 [Alternaria alternata]	PF05856.12	ARPC4	ARP2/3 complex 20 kDa subunit (ARPC4)	ENOG4111G2F	protein 2 3 complex, subunit	GO:0030041|actin filament polymerization;GO:0034314|Arp2/3 complex-mediated actin nucleationGO:0030041|actin filament polymerization;GO:0034314|Arp2/3 complex-mediated actin nucleation	GO:0051015|actin filament binding;GO:0019899|enzyme binding;GO:0030674|protein binding, bridging;GO:0005200|structural constituent of cytoskeleton	GO:0005885|Arp2/3 protein complex;GO:0042995|cell projection;GO:0005737|cytoplasm;GO:0005634|nucleus;GO:0035861|site of double-strand breakGO:0005885|Arp2/3 protein complex;GO:0015629|actin cytoskeleton	K05755|ARPC4; actin related protein 2/3 complex, subunit 4	map04144|Endocytosis;map05100|Bacterial invasion of epithelial cells;map05132|Salmonella infection;map05131|Shigellosis;map05130|Pathogenic Escherichia coli infection;map04666|Fc gamma R-mediated phagocytosis;map04810|Regulation of actin cytoskeleton
evm.model.contig7.919	Protein.evm.model.contig7.919::evm.model.contig7.919	2327344-2330533[-]	gi|169601893|ref|XM_001794317.1|	1153	E:0	Phaeosphaeria nodorum SN15 hypothetical protein partial mRNA	XP_028503134.1	1914	E:0	Calcium-transporting ATPase sarcoplasmic/endoplasmic reticulum type [Alternaria arborescens]	PF00690.26	Cation_ATPase_N	Cation transporter/ATPase, N-terminus	COG0474	P-type atpase	GO:0070588|calcium ion transmembrane transport;GO:0006874|cellular calcium ion homeostasis	GO:0005524|ATP binding;GO:0005388|calcium transmembrane transporter activity, phosphorylative mechanism;GO:0046872|metal ion binding;GO:0008553|proton-exporting ATPase activity, phosphorylative mechanism	GO:0016021|integral component of membrane;GO:0033017|sarcoplasmic reticulum membrane	K05853|ATP2A; Ca2+ transporting ATPase, sarcoplasmic/endoplasmic reticulum [EC:3.6.3.8]	map04022|cGMP-PKG signaling pathway;map04972|Pancreatic secretion;map05010|Alzheimer's disease;map04020|Calcium signaling pathway
evm.model.contig4.426	Protein.evm.model.contig4.426::evm.model.contig4.426	1205920-1207125[-]	gi|628244140|ref|XM_007720271.1|	459	E:3e-126	Bipolaris zeicola 26-R-13 hypothetical protein partial mRNA	OWY41493.1	617	E:0	regucalcin [Alternaria alternata]	PF08450.12	SGL	SMP-30/Gluconolactonase/LRE-like region	COG3386	SMP-30 gluconolaconase LRE domain protein	GO:0007568|aging;GO:0006874|cellular calcium ion homeostasis;GO:0001822|kidney development;GO:0019853|L-ascorbic acid biosynthetic process;GO:0097421|liver regeneration;GO:0043066|negative regulation of apoptotic process;GO:1903011|negative regulation of bone development;GO:1903611|negative regulation of calcium-dependent ATPase activity;GO:0051344|negative regulation of cyclic-nucleotide phospho…	GO:0005509|calcium ion binding;GO:0030234|enzyme regulator activity;GO:0004341|gluconolactonase activity;GO:0008270|zinc ion binding	GO:0005737|cytoplasm;GO:0005829|cytosol;GO:0005634|nucleus	K01053|E3.1.1.17, gnl, RGN; gluconolactonase [EC:3.1.1.17]	map00930|Caprolactam degradation;map00030|Pentose phosphate pathway;map01200|Carbon metabolism;map01220|Degradation of aromatic compounds;map00053|Ascorbate and aldarate metabolism;map01110|Biosynthesis of secondary metabolites;map01100|Metabolic pathways;map01120|Microbial metabolism in diverse environments;map01130|Biosynthesis of antibiotics
evm.model.contig2.923	Protein.evm.model.contig2.923::evm.model.contig2.923	2367009-2368589[-]	gi|953435334|ref|XM_014704253.1|	425	E:4e-116	Bipolaris victoriae FI3 glycoside hydrolase family 1 protein partial mRNA	RYN55740.1	688	E:0	hypothetical protein AA0114_g3357 [Alternaria tenuissima]	PF00232.18	Glyco_hydro_1	Glycosyl hydrolase family 1	COG2723	beta-glucosidase	GO:0005975|carbohydrate metabolic processGO:0005975|carbohydrate metabolic process	GO:0047668|amygdalin beta-glucosidase activity;GO:0033907|beta-D-fucosidase activity;GO:0004565|beta-galactosidase activity;GO:0080083|beta-gentiobiose beta-glucosidase activity;GO:0008422|beta-glucosidase activity;GO:0047701|beta-L-arabinosidase activity;GO:0004567|beta-mannosidase activity;GO:0080079|cellobiose glucosidase activity;GO:0042973|glucan endo-1,3-beta-D-glucosidase activity;GO:00428…	GO:0005576|extracellular region	K05350|bglB; beta-glucosidase [EC:3.2.1.21]	map01110|Biosynthesis of secondary metabolites;map01100|Metabolic pathways;map00940|Phenylpropanoid biosynthesis;map00460|Cyanoamino acid metabolism;map00500|Starch and sucrose metabolism
evm.model.contig9.718	Protein.evm.model.contig9.718::evm.model.contig9.718	1917833-1919736[+]	gi|189191481|ref|XM_001932045.1|	448	E:7e-123	Pyrenophora tritici-repentis Pt-1C-BFP AP-2 complex subunit sigma, mRNA	OWY44572.1	710	E:0	AP-2 complex subunit sigma [Alternaria alternata]	PF01217.20	Clat_adaptor_s	Clathrin adaptor complex small chain	COG5030	Adaptor-related protein complex	GO:0072583|clathrin-dependent endocytosis;GO:0015031|protein transport	GO:0035615|clathrin adaptor activity	GO:0030122|AP-2 adaptor complex	K11827|AP2S1; AP-2 complex subunit sigma-1	map04721|Synaptic vesicle cycle;map05016|Huntington's disease;map04961|Endocrine and other factor-regulated calcium reabsorption;map04144|Endocytosis
evm.model.contig9.339	Protein.evm.model.contig9.339::evm.model.contig9.339	886847-888500[+]	gi|189191793|ref|XM_001932201.1|	987	E:0	Pyrenophora tritici-repentis Pt-1C-BFP succinyl-CoA:3-ketoacid-coenzyme A transferase subunit B, mRNA	RYN37126.1	921	E:0	Succinyl-CoA:3-ketoacid coenzyme A transferase 1 [Alternaria tenuissima]	PF01144.23	CoA_trans	Coenzyme A transferase	COG1788	Key enzyme for ketone body catabolism. Transfers the CoA moiety from succinate to acetoacetate. Formation of the enzyme-CoA intermediate proceeds via an unstable anhydride species formed between the carboxylate groups of the enzyme and substrate (By similarity)	GO:0060612|adipose tissue development;GO:0007420|brain development;GO:0046950|cellular ketone body metabolic process;GO:0007507|heart development;GO:0046952|ketone body catabolic process;GO:0042182|ketone catabolic process;GO:0035774|positive regulation of insulin secretion involved in cellular response to glucose stimulus;GO:0014823|response to activity;GO:0045471|response to ethanol;GO:0009725|…	GO:0008260|3-oxoacid CoA-transferase activity;GO:0042803|protein homodimerization activityGO:0008410|CoA-transferase activity	GO:0005759|mitochondrial matrix;GO:0005739|mitochondrion;GO:0005654|nucleoplasm	K01027|OXCT; 3-oxoacid CoA-transferase [EC:2.8.3.5]	map00280|Valine, leucine and isoleucine degradation;map00650|Butanoate metabolism;map00072|Synthesis and degradation of ketone bodies
evm.model.contig1.1055	Protein.evm.model.contig1.1055::evm.model.contig1.1055	2575485-2577301[-]	gi|401021988|gb|JX207117.1|	863	E:0	Alternaria alternata strain EV-MIL 31 NADPH oxidase regulator (NoxR) gene, complete cds	XP_007703240.1	764	E:0	hypothetical protein COCSADRAFT_236710 [Bipolaris sorokiniana ND90Pr]	PF00515.28	TPR_1	Tetratricopeptide repeat	ENOG41110AD	Neutrophil cytosolic factor 2	GO:0006909|phagocytosis;GO:0045730|respiratory burst;GO:0042554|superoxide anion generation	GO:0048365|Rac GTPase binding;GO:0016176|superoxide-generating NADPH oxidase activator activityGO:0005515|protein binding	GO:0005829|cytosol;GO:0043020|NADPH oxidase complex	K08010|NCF2, P67PHOX; neutrophil cytosolic factor 2	map05140|Leishmaniasis;map04670|Leukocyte transendothelial migration;map04145|Phagosome;map04380|Osteoclast differentiation
evm.model.contig8.103	Protein.evm.model.contig8.103::evm.model.contig8.103	301256-301964[+]	gi|396463568|ref|XM_003836347.1|	87.9	E:6e-15	Leptosphaeria maculans JN3 hypothetical protein (LEMA_P039310.1) mRNA, complete cds	OWY57113.1	177	E:2e-53	DJ-1 protein [Alternaria alternata]	PF01965.24	DJ-1_PfpI	DJ-1/PfpI family	COG0693	PfpI family	GO:0006914|autophagy;GO:0070301|cellular response to hydrogen peroxide;GO:0034599|cellular response to oxidative stress;GO:0006281|DNA repair;GO:0042593|glucose homeostasis;GO:0106044|guanine deglycation;GO:0106046|guanine deglycation, glyoxal removal;GO:0106045|guanine deglycation, methylglyoxal removal;GO:0006954|inflammatory response;GO:0030073|insulin secretion;GO:0060548|negative regulation …	GO:0003729|mRNA binding;GO:0008233|peptidase activity;GO:0036524|protein deglycase activity;GO:0042803|protein homodimerization activity	GO:0005737|cytoplasm;GO:0005829|cytosol;GO:0045121|membrane raft;GO:0005739|mitochondrion;GO:0005634|nucleus;GO:0005886|plasma membrane	K05687|PARK7; protein DJ-1	map05012|Parkinson's disease
evm.model.contig3.311	Protein.evm.model.contig3.311::evm.model.contig3.311	817772-819285[-]	gi|953433090|ref|XM_014703131.1|	237	E:2e-59	Bipolaris victoriae FI3 hypothetical protein partial mRNA	RYO63542.1	446	E:7e-151	putative FAD-binding monooxygenase [Alternaria tenuissima]	PF13450.6	NAD_binding_8	NAD(P)-binding Rossmann-like domain	COG2072	Monooxygenase	GO:0017144|drug metabolic process;GO:0055114|oxidation-reduction process	GO:0008144|drug binding;GO:0071949|FAD binding;GO:0050660|flavin adenine dinucleotide binding;GO:0004499|N,N-dimethylaniline monooxygenase activity;GO:0070402|NADPH binding;GO:0016709|oxidoreductase activity, acting on paired donors, with incorporation or reduction of molecular oxygen, NAD(P)H as one donor, and incorporation of one atom of oxygen;GO:0033776|phenylacetone monooxygenase activity	GO:0005618|cell wall;GO:0005829|cytosol;GO:0005886|plasma membrane	K10215|ethA; monooxygenase [EC:1.14.13.-]	map01120|Microbial metabolism in diverse environments;map00627|Aminobenzoate degradation
evm.model.contig1.2563	Protein.evm.model.contig1.2563::evm.model.contig1.2563	6577291-6577874[-]	gi|189196501|ref|XM_001934554.1|	472	E:2e-130	Pyrenophora tritici-repentis Pt-1C-BFP conserved hypothetical protein, mRNA	XP_028502444.1	259	E:2e-80	hypothetical protein AA0111_g10010 [Alternaria arborescens]	PF00069.25	Pkinase	Protein kinase domain	ENOG410XP4K	p21 protein (Cdc42 Rac)-activated kinase	GO:0032147|activation of protein kinase activity;GO:0016477|cell migration;GO:0002119|nematode larval development;GO:0050770|regulation of axonogenesis;GO:0043408|regulation of MAPK cascade;GO:0023014|signal transduction by protein phosphorylation;GO:0031098|stress-activated protein kinase signaling cascadeGO:0006468|protein phosphorylation	GO:0005524|ATP binding;GO:0046872|metal ion binding;GO:0004674|protein serine/threonine kinase activity;GO:0048365|Rac GTPase bindingGO:0004672|protein kinase activity;GO:0005524|ATP binding	GO:0005737|cytoplasm	K05734|PAK4; p21-activated kinase 4 [EC:2.7.11.1]	map04360|Axon guidance;map05206|MicroRNAs in cancer;map04510|Focal adhesion;map04014|Ras signaling pathway;map04012|ErbB signaling pathway;map04660|T cell receptor signaling pathway;map05211|Renal cell carcinoma;map04810|Regulation of actin cytoskeleton
evm.model.contig2.1376	Protein.evm.model.contig2.1376::evm.model.contig2.1376	3517064-3518276[-]	gi|189205636|ref|XM_001939118.1|	645	E:0	Pyrenophora tritici-repentis Pt-1C-BFP pantothenate synthetase, mRNA	RII16880.1	738	E:0	hypothetical protein CUC08_Gglean003328 [Alternaria sp. MG1]	PF02569.15	Pantoate_ligase	Pantoate-beta-alanine ligase	COG0414	Catalyzes the condensation of pantoate with beta-alanine in an ATP-dependent reaction via a pantoyl-adenylate intermediate (By similarity)	GO:0033317|pantothenate biosynthetic process from valineGO:0015940|pantothenate biosynthetic process	GO:0005524|ATP binding;GO:0004592|pantoate-beta-alanine ligase activityGO:0004592|pantoate-beta-alanine ligase activity	GO:0005829|cytosol	K01918|panC; pantoate--beta-alanine ligase [EC:6.3.2.1]	map01100|Metabolic pathways;map01110|Biosynthesis of secondary metabolites;map00770|Pantothenate and CoA biosynthesis;map00410|beta-Alanine metabolism
evm.model.contig2.453	Protein.evm.model.contig2.453::evm.model.contig2.453	1240014-1244038[+]	gi|636590680|ref|XM_008028488.1|	135	E:1e-28	Setosphaeria turcica Et28A hypothetical protein partial mRNA	RYO50332.1	957	E:0	hypothetical protein AG0111_g1055 [Alternaria gaisen]	PF00179.26	UQ_con	Ubiquitin-conjugating enzyme	COG5078	ubiquitin-conjugating enzyme	GO:1904153|negative regulation of retrograde protein transport, ER to cytosol;GO:0018279|protein N-linked glycosylation via asparagine;GO:0042534|regulation of tumor necrosis factor biosynthetic process;GO:0007286|spermatid development;GO:0030433|ubiquitin-dependent ERAD pathway	GO:0005524|ATP binding;GO:0061631|ubiquitin conjugating enzyme activity;GO:0031625|ubiquitin protein ligase binding	GO:0005789|endoplasmic reticulum membrane;GO:0016021|integral component of membrane	K10578|UBE2J1, NCUBE1, UBC6; ubiquitin-conjugating enzyme E2 J1 [EC:2.3.2.23]	map04141|Protein processing in endoplasmic reticulum;map05012|Parkinson's disease;map04120|Ubiquitin mediated proteolysis
evm.model.contig5.825	Protein.evm.model.contig5.825::evm.model.contig5.825	2163990-2166123[+]	gi|702073665|emb|FO906012.1|	200	E:4e-48	Leptosphaeria maculans lepidii ibcn84_scaffold00012 complete sequence	XP_018387011.1	1097	E:0	origin recognition complex subunit [Alternaria alternata]	PF07034.11	ORC3_N	Origin recognition complex (ORC) subunit 3 N-terminus	ENOG410XT1W	origin recognition complex subunit	GO:0006270|DNA replication initiation;GO:0006267|pre-replicative complex assembly involved in nuclear cell cycle DNA replication;GO:0006275|regulation of DNA replicationGO:0006260|DNA replication	GO:0003688|DNA replication origin bindingGO:0003677|DNA binding	GO:0000785|chromatin;GO:0031261|DNA replication preinitiation complex;GO:0005664|nuclear origin of replication recognition complex;GO:0005656|nuclear pre-replicative complexGO:0005664|nuclear origin of replication recognition complex	K02605|ORC3; origin recognition complex subunit 3	map04113|Meiosis - yeast;map04110|Cell cycle;map04111|Cell cycle - yeast
evm.model.contig2.1318	Protein.evm.model.contig2.1318::evm.model.contig2.1318	3374020-3374753[+]	gi|627820104|ref|XM_007684702.1|	640	E:0	Bipolaris oryzae ATCC 44560 hypothetical protein partial mRNA	XP_018385629.1	429	E:2e-150	vesicle-associated membrane protein-like protein [Alternaria alternata]	PF13774.6	Longin	Regulated-SNARE-like domain	COG5143	Vesicle-associated membrane protein	GO:0006887|exocytosis;GO:0015031|protein transport;GO:0009651|response to salt stress;GO:0006906|vesicle fusionGO:0016192|vesicle-mediated transport	GO:0005484|SNAP receptor activity;GO:0000149|SNARE binding	GO:0005794|Golgi apparatus;GO:0000139|Golgi membrane;GO:0016021|integral component of membrane;GO:0031201|SNARE complex;GO:0005773|vacuoleGO:0016021|integral component of membrane	K08515|VAMP7; vesicle-associated membrane protein 7	map04130|SNARE interactions in vesicular transport
evm.model.contig2.754	Protein.evm.model.contig2.754::evm.model.contig2.754	1907420-1907979[+]	gi|928519425|ref|XM_014223035.1|	366	E:8e-99	Bipolaris maydis ATCC 48331 hypothetical protein partial mRNA	XP_018387940.1	293	E:2e-99	nuclear cap-binding protein subunit 2 [Alternaria alternata]	PF00076.22	RRM_1	RNA recognition motif. (a.k.a. RRM, RBD, or RNP domain)	ENOG4111FJQ	Nuclear cap-binding protein subunit	GO:0031047|gene silencing by RNA;GO:0045292|mRNA cis splicing, via spliceosome;GO:0000398|mRNA splicing, via spliceosome	GO:0000339|RNA cap bindingGO:0003676|nucleic acid binding	GO:0005846|nuclear cap binding complex;GO:0005634|nucleus	K12883|NCBP2, CBP20; nuclear cap-binding protein subunit 2	map03015|mRNA surveillance pathway;map03040|Spliceosome;map03013|RNA transport
evm.model.contig1.75	Protein.evm.model.contig1.75::evm.model.contig1.75	203238-204270[-]	gi|928508494|ref|XM_014217576.1|	750	E:0	Bipolaris maydis ATCC 48331 hypothetical protein partial mRNA	OWY47546.1	580	E:0	homeobox-like protein [Alternaria alternata]	PF00046.29	Homeodomain	Homeodomain	ENOG410XS01	Paired box	GO:0048708|astrocyte differentiation;GO:0007420|brain development;GO:0035690|cellular response to drug;GO:0044344|cellular response to fibroblast growth factor stimulus;GO:0071333|cellular response to glucose stimulus;GO:0032869|cellular response to insulin stimulus;GO:0071380|cellular response to prostaglandin E stimulus;GO:0007417|central nervous system development;GO:0021549|cerebellum develop…	GO:0003680|AT DNA binding;GO:0003700|DNA-binding transcription factor activity;GO:0000981|DNA-binding transcription factor activity, RNA polymerase II-specific;GO:0003690|double-stranded DNA binding;GO:0000978|RNA polymerase II proximal promoter sequence-specific DNA binding;GO:0043565|sequence-specific DNA bindingGO:0003677|DNA binding	GO:0000790|nuclear chromatin;GO:0005634|nucleus	K08031|PAX6; paired box protein 6	map04550|Signaling pathways regulating pluripotency of stem cells;map04950|Maturity onset diabetes of the young
evm.model.contig3.237	Protein.evm.model.contig3.237::evm.model.contig3.237	655606-658556[-]	gi|702073522|emb|FO905896.1|	431	E:1e-117	Leptosphaeria biglobosa Thlaspii ibcn65_scaffold00005 complete sequence	RAR12468.1	973	E:0	malonyl-CoA-acyl carrier protein transacylase [Stemphylium lycopersici]	PF13561.6	adh_short_C2	Enoyl-(Acyl carrier protein) reductase	COG0331	Malonyl coA-acyl carrier protein transacylase	GO:0006633|fatty acid biosynthetic process	GO:0004314|[acyl-carrier-protein] S-malonyltransferase activity	GO:0005829|cytosol	K00645|fabD; [acyl-carrier-protein] S-malonyltransferase [EC:2.3.1.39]	map01100|Metabolic pathways;map00061|Fatty acid biosynthesis;map01212|Fatty acid metabolism
evm.model.contig3.482	Protein.evm.model.contig3.482::evm.model.contig3.482	1252855-1254556[-]	gi|702073686|emb|FO906033.1|	364	E:1e-97	Leptosphaeria maculans brassicae jn3_SuperContig_6 complete sequence	XP_018383740.1	766	E:0	aldolase [Alternaria alternata]	PF01487.15	DHquinase_I	Type I 3-dehydroquinase	COG0128	5-enolpyruvylshikimate-3-phosphate synthase	GO:0009073|aromatic amino acid family biosynthetic process;GO:0009423|chorismate biosynthetic process	GO:0003855|3-dehydroquinate dehydratase activity;GO:0003856|3-dehydroquinate synthase activity;GO:0003866|3-phosphoshikimate 1-carboxyvinyltransferase activity;GO:0005524|ATP binding;GO:0046872|metal ion binding;GO:0004764|shikimate 3-dehydrogenase (NADP+) activity;GO:0004765|shikimate kinase activityGO:0003855|3-dehydroquinate dehydratase activity	GO:0005737|cytoplasm	K13830|ARO1; pentafunctional AROM polypeptide [EC:4.2.3.4 4.2.1.10 1.1.1.25 2.7.1.71 2.5.1.19]	map01230|Biosynthesis of amino acids;map01100|Metabolic pathways;map00400|Phenylalanine, tyrosine and tryptophan biosynthesis;map01110|Biosynthesis of secondary metabolites;map01130|Biosynthesis of antibiotics
evm.model.contig2.352	Protein.evm.model.contig2.352::evm.model.contig2.352	1009846-1010276[+]	gi|927423105|ref|XM_014101909.1|	82.4	E:2e-13	Trichoderma virens Gv29-8 ras-GTPase RSR1 (rsr1), partial mRNA	XP_001930669.1	120	E:6e-34	GTPase KRas precursor [Pyrenophora tritici-repentis Pt-1C-BFP]	PF00071.22	Ras	Ras family	COG1100	GTP-binding Protein	GO:0071320|cellular response to cAMP;GO:0040002|collagen and cuticulin-based cuticle development;GO:0008544|epidermis development;GO:2000301|negative regulation of synaptic vesicle exocytosis;GO:0032486|Rap protein signal transduction;GO:0007264|small GTPase mediated signal transduction	GO:0019003|GDP binding;GO:0005525|GTP binding;GO:0003924|GTPase activityGO:0003924|GTPase activity;GO:0005525|GTP binding	GO:0005886|plasma membrane	K04353|RAP1A; Ras-related protein Rap-1A	map04062|Chemokine signaling pathway;map04014|Ras signaling pathway;map04972|Pancreatic secretion;map04510|Focal adhesion;map04720|Long-term potentiation;map04015|Rap1 signaling pathway;map04722|Neurotrophin signaling pathway;map04024|cAMP signaling pathway;map04010|MAPK signaling pathway;map04670|Leukocyte transendothelial migration;map04611|Platelet activation;map05211|Renal cell carcinoma
evm.model.contig9.420	Protein.evm.model.contig9.420::evm.model.contig9.420	1085738-1087159[-]	gi|189191945|ref|XM_001932277.1|	560	E:1e-156	Pyrenophora tritici-repentis Pt-1C-BFP glutaryl-CoA dehydrogenase, mitochondrial precursor, mRNA	RYN60218.1	834	E:0	Glutaryl-CoA dehydrogenase [Alternaria tenuissima]	PF02771.16	Acyl-CoA_dh_N	Acyl-CoA dehydrogenase, N-terminal domain	COG1960	acyl-CoA dehydrogenase	GO:0033539|fatty acid beta-oxidation using acyl-CoA dehydrogenase;GO:0006568|tryptophan metabolic processGO:0055114|oxidation-reduction process	GO:0003995|acyl-CoA dehydrogenase activity;GO:0050660|flavin adenine dinucleotide binding;GO:0044466|glutaryl-CoA hydrolase activityGO:0016627|oxidoreductase activity, acting on the CH-CH group of donors;GO:0050660|flavin adenine dinucleotide binding	GO:0005759|mitochondrial matrix;GO:0005739|mitochondrion	K00252|GCDH, gcdH; glutaryl-CoA dehydrogenase [EC:1.3.8.6]	map00071|Fatty acid degradation;map00310|Lysine degradation;map00362|Benzoate degradation;map01100|Metabolic pathways;map00380|Tryptophan metabolism;map01120|Microbial metabolism in diverse environments;map01130|Biosynthesis of antibiotics
evm.model.contig2.332	Protein.evm.model.contig2.332::evm.model.contig2.332	972912-974393[+]	gi|928519347|ref|XM_014222996.1|	564	E:9e-158	Bipolaris maydis ATCC 48331 hypothetical protein mRNA	XP_018384555.1	918	E:0	FAD dependent oxidoreductase [Alternaria alternata]	PF01266.24	DAO	FAD dependent oxidoreductase	ENOG410XWBT	fad dependent oxidoreductase	GO:0055114|oxidation-reduction process	GO:0016491|oxidoreductase activityGO:0016491|oxidoreductase activity	GO:0005737|cytoplasm	K09471|puuB, ordL; gamma-glutamylputrescine oxidase [EC:1.4.3.-]	map01100|Metabolic pathways;map00330|Arginine and proline metabolism
evm.model.contig2.1607	Protein.evm.model.contig2.1607::evm.model.contig2.1607	4089795-4091540[+]	gi|189206344|ref|XM_001939472.1|	1328	E:0	Pyrenophora tritici-repentis Pt-1C-BFP homocitrate synthase, mRNA	XP_018383213.1	851	E:0	homocitrate synthase [Alternaria alternata]	PF00682.19	HMGL-like	HMGL-like	COG0119	Catalyzes the condensation of the acetyl group of acetyl-CoA with 3-methyl-2-oxobutanoate (2-oxoisovalerate) to form 3-carboxy-3-hydroxy-4-methylpentanoate (2-isopropylmalate) (By similarity)	GO:0019878|lysine biosynthetic process via aminoadipic acid	GO:0004410|homocitrate synthase activityGO:0003824|catalytic activity	GO:0005739|mitochondrion	K01655|LYS21, LYS20; homocitrate synthase [EC:2.3.3.14]	map00620|Pyruvate metabolism;map01210|2-Oxocarboxylic acid metabolism;map01230|Biosynthesis of amino acids;map00300|Lysine biosynthesis;map01100|Metabolic pathways;map01120|Microbial metabolism in diverse environments;map01130|Biosynthesis of antibiotics
evm.model.contig8.817	Protein.evm.model.contig8.817::evm.model.contig8.817	2263634-2267043[-]	gi|636580894|ref|XM_008023595.1|	737	E:0	Setosphaeria turcica Et28A hypothetical protein mRNA	RYN73236.1	1108	E:0	hypothetical protein AA0117_g7969 [Alternaria alternata]	PF04376.13	ATE_N	Arginine-tRNA-protein transferase, N terminus	ENOG410XR2S	Trans-2,3-enoyl-CoA	GO:0030497|fatty acid elongation;GO:0006694|steroid biosynthetic process;GO:0042761|very long-chain fatty acid biosynthetic processGO:0016598|protein arginylation;GO:0006629|lipid metabolic process	GO:0016491|oxidoreductase activity;GO:0102758|very-long-chain enoyl-CoA reductase activityGO:0004057|arginyltransferase activity;GO:0016627|oxidoreductase activity, acting on the CH-CH group of donors	GO:0030176|integral component of endoplasmic reticulum membrane	K10258|TER, TSC13, CER10; very-long-chain enoyl-CoA reductase [EC:1.3.1.93]	map00062|Fatty acid elongation;map01212|Fatty acid metabolism;map01110|Biosynthesis of secondary metabolites;map01040|Biosynthesis of unsaturated fatty acids
evm.model.contig1.276	Protein.evm.model.contig1.276::evm.model.contig1.276	681196-684121[+]	gi|627828867|ref|XM_007687940.1|	715	E:0	Bipolaris oryzae ATCC 44560 hypothetical protein partial mRNA	KNG49390.1	710	E:0	galactokinase [Stemphylium lycopersici]	PF08651.10	DASH_Duo1	DASH complex subunit Duo1	COG0153	Catalyzes the transfer of the gamma-phosphate of ATP to D-galactose to form alpha-D-galactose-1-phosphate (Gal-1-P) (By similarity)	GO:0006012|galactose metabolic processGO:0000278|mitotic cell cycle	GO:0005524|ATP binding;GO:0004335|galactokinase activity;GO:0005534|galactose bindingGO:0005534|galactose binding;GO:0005524|ATP binding	GO:0005737|cytoplasmGO:0042729|DASH complex;GO:0072686|mitotic spindle	K00849|galK; galactokinase [EC:2.7.1.6]	map01100|Metabolic pathways;map00052|Galactose metabolism;map00520|Amino sugar and nucleotide sugar metabolism
evm.model.contig2.1239	Protein.evm.model.contig2.1239::evm.model.contig2.1239	3182294-3182937[+]	gi|189205680|ref|XM_001939140.1|	252	E:2e-64	Pyrenophora tritici-repentis Pt-1C-BFP conserved hypothetical protein, mRNA	RYN43039.1	129	E:2e-36	hypothetical protein AA0112_g894 [Alternaria arborescens]	PF01423.22	LSM	LSM domain	ENOG41124H7	N(alpha)-acetyltransferase 38, NatC auxiliary	GO:0000398|mRNA splicing, via spliceosome	GO:0003723|RNA binding	GO:0120115|Lsm2-8 complex;GO:0005634|nucleus;GO:0071005|U2-type precatalytic spliceosome;GO:0046540|U4/U6 x U5 tri-snRNP complex;GO:0005688|U6 snRNP	K12627|LSM8; U6 snRNA-associated Sm-like protein LSm8	map03040|Spliceosome;map03018|RNA degradation
evm.model.contig7.407	Protein.evm.model.contig7.407::evm.model.contig7.407	1033962-1034774[-]	gi|628061660|ref|XM_007698424.1|	595	E:1e-167	Cochliobolus sativus ND90Pr hypothetical protein mRNA	XP_018385024.1	264	E:1e-87	ribosomal protein L28e [Alternaria alternata]	PF01778.17	Ribosomal_L28e	Ribosomal L28e protein family	ENOG4111T32	protein complex subunit organization	GO:0000184|nuclear-transcribed mRNA catabolic process, nonsense-mediated decay;GO:0006614|SRP-dependent cotranslational protein targeting to membrane;GO:0006412|translation;GO:0006413|translational initiation;GO:0019083|viral transcription	GO:0003723|RNA binding;GO:0003735|structural constituent of ribosome	GO:0044297|cell body;GO:0036464|cytoplasmic ribonucleoprotein granule;GO:0005829|cytosol;GO:0022625|cytosolic large ribosomal subunit;GO:0030425|dendrite;GO:0070062|extracellular exosome;GO:0016020|membrane	K02903|RP-L28e, RPL28; large subunit ribosomal protein L28e	map03010|Ribosome
evm.model.contig2.1356	Protein.evm.model.contig2.1356::evm.model.contig2.1356	3466066-3467646[+]	gi|628053838|ref|XM_007696049.1|	481	E:6e-133	Cochliobolus sativus ND90Pr hypothetical protein mRNA	RYO51810.1	283	E:1e-89	hypothetical protein AG0111_g157 [Alternaria gaisen]	PF04683.13	Proteasom_Rpn13	Proteasome complex subunit Rpn13 ubiquitin receptor	ENOG410XSJJ	Adhesion regulating molecule	GO:0043248|proteasome assembly;GO:0006511|ubiquitin-dependent protein catabolic process	GO:0061133|endopeptidase activator activity;GO:0070628|proteasome binding;GO:0043130|ubiquitin binding;GO:1990381|ubiquitin-specific protease binding	GO:0005737|cytoplasm;GO:0005634|nucleus;GO:0000502|proteasome complex;GO:0008541|proteasome regulatory particle, lid subcomplexGO:0005634|nucleus;GO:0005737|cytoplasm	K06691|RPN13; 26S proteasome regulatory subunit N13	map03050|Proteasome;map05169|Epstein-Barr virus infection
evm.model.contig9.482	Protein.evm.model.contig9.482::evm.model.contig9.482	1303568-1304550[-]	gi|636591932|ref|XM_008029114.1|	525	E:3e-146	Setosphaeria turcica Et28A hypothetical protein mRNA	RYO35793.1	362	E:1e-121	hypothetical protein AG0111_g9462 [Alternaria gaisen]	PF00076.22	RRM_1	RNA recognition motif. (a.k.a. RRM, RBD, or RNP domain)	ENOG410XQBV	cleavage stimulation factor	GO:0006378|mRNA polyadenylation;GO:0098789|pre-mRNA cleavage required for polyadenylationGO:0031124|mRNA 3'-end processing	GO:0003729|mRNA binding;GO:0003723|RNA bindingGO:0003676|nucleic acid binding	GO:0071920|cleavage body;GO:0005847|mRNA cleavage and polyadenylation specificity factor complex	K14407|CSTF2, RNA15; cleavage stimulation factor subunit 2	map03015|mRNA surveillance pathway
evm.model.contig8.127	Protein.evm.model.contig8.127::evm.model.contig8.127	370524-373414[-]	gi|928531803|ref|XM_014229224.1|	231	E:2e-57	Bipolaris maydis ATCC 48331 glycoside hydrolase family 3 protein partial mRNA	OWY57135.1	1236	E:0	hypothetical protein AALT_g9281 [Alternaria alternata]	PF00933.21	Glyco_hydro_3	Glycosyl hydrolase family 3 N terminal domain	COG1472	hydrolase family 3	GO:0005975|carbohydrate metabolic processGO:0005975|carbohydrate metabolic process	GO:0008422|beta-glucosidase activity;GO:0015926|glucosidase activity;GO:0102483|scopolin beta-glucosidase activityGO:0004553|hydrolase activity, hydrolyzing O-glycosyl compounds	GO:0030288|outer membrane-bounded periplasmic space;GO:0042597|periplasmic space	K05349|bglX; beta-glucosidase [EC:3.2.1.21]	map01110|Biosynthesis of secondary metabolites;map01100|Metabolic pathways;map00940|Phenylpropanoid biosynthesis;map00460|Cyanoamino acid metabolism;map00500|Starch and sucrose metabolism
evm.model.contig2.1497	Protein.evm.model.contig2.1497::evm.model.contig2.1497	3783348-3784390[+]	gi|628056527|ref|XM_007696837.1|	898	E:0	Cochliobolus sativus ND90Pr hypothetical protein mRNA	XP_018385454.1	692	E:0	WD40 repeat-like protein [Alternaria alternata]	PF00400.32	WD40	WD domain, G-beta repeat	ENOG410XRBG	Mitotic checkpoint protein	GO:0051301|cell division;GO:0007059|chromosome segregation;GO:0051321|meiotic cell cycle;GO:0007094|mitotic spindle assembly checkpoint	GO:0043130|ubiquitin bindingGO:0005515|protein binding	GO:1990298|bub1-bub3 complex;GO:0000777|condensed chromosome kinetochore;GO:0000776|kinetochore;GO:0033597|mitotic checkpoint complex;GO:0009524|phragmoplast;GO:0005819|spindle	K02180|BUB3; cell cycle arrest protein BUB3	map05166|HTLV-I infection;map04111|Cell cycle - yeast;map04110|Cell cycle
evm.model.contig7.152	Protein.evm.model.contig7.152::evm.model.contig7.152	411641-412954[+]	gi|189190423|ref|XM_001931516.1|	481	E:4e-133	Pyrenophora tritici-repentis Pt-1C-BFP conserved hypothetical protein, mRNA	RYO58225.1	345	E:4e-117	hypothetical protein AA0116_g7409 [Alternaria tenuissima]	PF04511.15	DER1	Der1-like family	COG5291	Derlin 1	GO:0034620|cellular response to unfolded protein;GO:0030968|endoplasmic reticulum unfolded protein response;GO:0071712|ER-associated misfolded protein catabolic process;GO:0036503|ERAD pathway;GO:0032092|positive regulation of protein binding;GO:0031398|positive regulation of protein ubiquitination;GO:0043161|proteasome-mediated ubiquitin-dependent protein catabolic process;GO:0031648|protein des…	GO:0051117|ATPase binding;GO:0042288|MHC class I protein binding;GO:0051787|misfolded protein binding;GO:0002020|protease binding;GO:0031625|ubiquitin protein ligase binding;GO:1990381|ubiquitin-specific protease binding	GO:0036513|Derlin-1 retrotranslocation complex;GO:0036502|Derlin-1-VIMP complex;GO:0005769|early endosome;GO:0005783|endoplasmic reticulum;GO:0000839|Hrd1p ubiquitin ligase ERAD-L complex;GO:0030176|integral component of endoplasmic reticulum membrane;GO:0016021|integral component of membrane;GO:0005770|late endosome;GO:0048500|signal recognition particle;GO:0005785|signal recognition particle re…	K11519|DERL1; Derlin-1	map05014|Amyotrophic lateral sclerosis (ALS);map04141|Protein processing in endoplasmic reticulum
evm.model.contig1.850	Protein.evm.model.contig1.850::evm.model.contig1.850	2079469-2080674[+]	gi|189194464|ref|XM_001933536.1|	582	E:2e-163	Pyrenophora tritici-repentis Pt-1C-BFP hypothetical protein, mRNA	RII06424.1	631	E:0	hypothetical protein CUC08_Gglean009645 [Alternaria sp. MG1]	PF05686.12	Glyco_transf_90	Glycosyl transferase family 90	ENOG410XT5U	KDEL (Lys-Asp-Glu-Leu) containing	GO:0048318|axial mesoderm development;GO:0072358|cardiovascular system development;GO:0007369|gastrulation;GO:0060537|muscle tissue development;GO:0048339|paraxial mesoderm development;GO:0045747|positive regulation of Notch signaling pathway;GO:0006493|protein O-linked glycosylation;GO:0018242|protein O-linked glycosylation via serine;GO:0010470|regulation of gastrulation;GO:0001756|somitogenesis	GO:0046527|glucosyltransferase activity;GO:0030158|protein xylosyltransferase activity;GO:0035251|UDP-glucosyltransferase activity;GO:0035252|UDP-xylosyltransferase activity	GO:0005788|endoplasmic reticulum lumen	K13667|RUMI, KTELC1; protein glucosyltransferase [EC:2.4.1.-]	map00514|Other types of O-glycan biosynthesis
evm.model.contig4.1098	Protein.evm.model.contig4.1098::evm.model.contig4.1098	2901365-2902218[-]	gi|636590796|ref|XM_008028546.1|	531	E:3e-148	Setosphaeria turcica Et28A hypothetical protein mRNA	XP_028505504.1	314	E:1e-106	Ras-related C3 botulinum toxin substrate 1 [Alternaria arborescens]	PF00071.22	Ras	Ras family	COG1100	GTP-binding Protein	GO:0030036|actin cytoskeleton organization;GO:0007015|actin filament organization;GO:0045453|bone resorption;GO:0016477|cell migration;GO:0048870|cell motility;GO:0008283|cell population proliferation;GO:0030031|cell projection assembly;GO:0071260|cellular response to mechanical stimulus;GO:0006935|chemotaxis;GO:0048012|hepatocyte growth factor receptor signaling pathway;GO:0030032|lamellipodium …	GO:0051117|ATPase binding;GO:0005525|GTP binding;GO:0003924|GTPase activity;GO:0042826|histone deacetylase binding;GO:0019901|protein kinase binding;GO:0044877|protein-containing complex binding;GO:0017137|Rab GTPase binding;GO:0051022|Rho GDP-dissociation inhibitor binding;GO:0031996|thioesterase bindingGO:0003924|GTPase activity;GO:0005525|GTP binding	GO:0005884|actin filament;GO:0042995|cell projection;GO:0005737|cytoplasm;GO:0036464|cytoplasmic ribonucleoprotein granule;GO:0031410|cytoplasmic vesicle;GO:0005829|cytosol;GO:0043197|dendritic spine;GO:0098978|glutamatergic synapse;GO:0000139|Golgi membrane;GO:0030027|lamellipodium;GO:0042470|melanosome;GO:0016020|membrane;GO:0005886|plasma membrane;GO:0055038|recycling endosome membrane;GO:0032…	K04392|RAC1; Ras-related C3 botulinum toxin substrate 1	map04071|Sphingolipid signaling pathway;map04620|Toll-like receptor signaling pathway;map05100|Bacterial invasion of epithelial cells;map04151|PI3K-Akt signaling pathway;map05120|Epithelial cell signaling in Helicobacter pylori infection;map04360|Axon guidance;map05200|Pathways in cancer;map05203|Viral carcinogenesis;map04015|Rap1 signaling pathway;map04520|Adherens junction;map04010|MAPK signali…
evm.model.contig5.443	Protein.evm.model.contig5.443::evm.model.contig5.443	1168341-1170235[+]	gi|189203992|ref|XM_001938297.1|	824	E:0	Pyrenophora tritici-repentis Pt-1C-BFP calreticulin precursor, mRNA	RYN33572.1	795	E:0	Calnexin [Alternaria tenuissima]	PF00262.18	Calreticulin	Calreticulin family	ENOG410XP7T	Calnexin	GO:0006457|protein foldingGO:0006457|protein folding	GO:0005509|calcium ion binding;GO:0051082|unfolded protein bindingGO:0005509|calcium ion binding;GO:0051082|unfolded protein binding	GO:0005789|endoplasmic reticulum membrane;GO:0016021|integral component of membraneGO:0005783|endoplasmic reticulum	K08054|CANX; calnexin	map04141|Protein processing in endoplasmic reticulum;map05166|HTLV-I infection;map04145|Phagosome;map04918|Thyroid hormone synthesis;map04612|Antigen processing and presentation
evm.model.contig2.1253	Protein.evm.model.contig2.1253::evm.model.contig2.1253	3218540-3220063[+]	gi|628053960|ref|XM_007696084.1|	784	E:0	Cochliobolus sativus ND90Pr hypothetical protein mRNA	RYN71203.1	798	E:0	hypothetical protein AA0117_g9830 [Alternaria alternata]	PF13520.6	AA_permease_2	Amino acid permease	COG0531	amino acid	GO:0015811|L-cystine transport;GO:0015804|neutral amino acid transportGO:0055085|transmembrane transport	GO:0015184|L-cystine transmembrane transporter activity;GO:0015175|neutral amino acid transmembrane transporter activity;GO:0042605|peptide antigen bindingGO:0022857|transmembrane transporter activity	GO:0016324|apical plasma membrane;GO:0031526|brush border membrane;GO:0016021|integral component of membrane;GO:0005886|plasma membraneGO:0016020|membrane	K13868|SLC7A9, BAT1; solute carrier family 7 (L-type amino acid transporter), member 9	map04974|Protein digestion and absorption
evm.model.contig6.134	Protein.evm.model.contig6.134::evm.model.contig6.134	352624-357134[-]	gi|189195893|ref|XM_001934250.1|	665	E:0	Pyrenophora tritici-repentis Pt-1C-BFP histone-lysine N-methyltransferase, mRNA	RII24839.1	1542	E:0	hypothetical protein CUC08_Gglean011852 [Alternaria sp. MG1]	PF17907.1	AWS	AWS domain	COG2940	Histone-lysine N-methyltransferase	GO:0006354|DNA-templated transcription, elongation;GO:0006355|regulation of transcription, DNA-templatedGO:0006355|regulation of transcription, DNA-templated;GO:0034968|histone lysine methylation	GO:0046975|histone methyltransferase activity (H3-K36 specific)GO:0018024|histone-lysine N-methyltransferase activity	GO:0005694|chromosome;GO:0005634|nucleusGO:0005634|nucleus;GO:0005694|chromosome	K11423|SETD2, SET2; histone-lysine N-methyltransferase SETD2 [EC:2.1.1.43]	map00310|Lysine degradation
evm.model.contig10.73	Protein.evm.model.contig10.73::evm.model.contig10.73	182540-184182[-]	gi|628081681|ref|XM_007704501.1|	409	E:5e-111	Cochliobolus sativus ND90Pr hypothetical protein mRNA	XP_028504290.1	816	E:0	hypothetical protein AA0111_g7944 [Alternaria arborescens]	PF01798.18	Nop	snoRNA binding domain, fibrillarin	COG1498	Nucleolar protein	GO:0000398|mRNA splicing, via spliceosome;GO:0071166|ribonucleoprotein complex localization;GO:0000244|spliceosomal tri-snRNP complex assembly	GO:0043021|ribonucleoprotein complex binding;GO:0070990|snRNP binding;GO:0030621|U4 snRNA binding;GO:0030622|U4atac snRNA binding	GO:0015030|Cajal body;GO:0071339|MLL1 complex;GO:0016607|nuclear speck;GO:0005634|nucleus;GO:0071005|U2-type precatalytic spliceosome;GO:0005687|U4 snRNP;GO:0046540|U4/U6 x U5 tri-snRNP complex;GO:0005690|U4atac snRNP	K12844|PRPF31; U4/U6 small nuclear ribonucleoprotein PRP31	map03040|Spliceosome
evm.model.contig9.32	Protein.evm.model.contig9.32::evm.model.contig9.32	85706-87537[-]	gi|636591598|ref|XM_008028947.1|	442	E:5e-121	Setosphaeria turcica Et28A glycoside hydrolase family 76 protein partial mRNA	XP_028501193.1	957	E:0	putative methylcrotonoyl-CoA carboxylase beta chain [Alternaria arborescens]	PF01039.22	Carboxyl_trans	Carboxyl transferase domain	COG4799	carboxylase	GO:0015936|coenzyme A metabolic process;GO:0006552|leucine catabolic process	GO:0005524|ATP binding;GO:0004485|methylcrotonoyl-CoA carboxylase activity	GO:1905202|methylcrotonoyl-CoA carboxylase complex;GO:0005759|mitochondrial matrix;GO:0005739|mitochondrion	K01969|E6.4.1.4B; 3-methylcrotonyl-CoA carboxylase beta subunit [EC:6.4.1.4]	map00280|Valine, leucine and isoleucine degradation;map01100|Metabolic pathways
evm.model.contig2.2135	Protein.evm.model.contig2.2135::evm.model.contig2.2135	5423367-5424093[+]	gi|667830377|ref|XM_007781168.1|	104	E:1e-19	Coniosporium apollinis CBS 100218 hypothetical protein partial mRNA	XP_018382752.1	369	E:1e-122	amidase signature enzyme [Alternaria alternata]	PF01425.21	Amidase	Amidase	COG0154	Allows the formation of correctly charged Gln-tRNA(Gln) through the transamidation of misacylated Glu-tRNA(Gln) in organisms which lack glutaminyl-tRNA synthetase. The reaction takes place in the presence of glutamine and ATP through an activated gamma-phospho-Glu-tRNA(Gln) (By similarity)	GO:0006412|translation	GO:0004040|amidase activity;GO:0005524|ATP binding;GO:0050567|glutaminyl-tRNA synthase (glutamine-hydrolyzing) activity	GO:0030956|glutamyl-tRNA(Gln) amidotransferase complex	K02433|gatA, QRSL1; aspartyl-tRNA(Asn)/glutamyl-tRNA(Gln) amidotransferase subunit A [EC:6.3.5.6 6.3.5.7]	map01100|Metabolic pathways;map00970|Aminoacyl-tRNA biosynthesis
evm.model.contig4.114	Protein.evm.model.contig4.114::evm.model.contig4.114	342396-344139[+]	gi|627829765|ref|XM_007688223.1|	318	E:6e-84	Bipolaris oryzae ATCC 44560 hypothetical protein partial mRNA	XP_001937244.1	296	E:5e-92	hypothetical protein PTRG_06911 [Pyrenophora tritici-repentis Pt-1C-BFP]	PF00400.32	WD40	WD domain, G-beta repeat	COG2319	wd repeat	GO:0051301|cell division;GO:0042023|DNA endoreduplication;GO:0009825|multidimensional cell growth;GO:1904668|positive regulation of ubiquitin protein ligase activity;GO:0016567|protein ubiquitination;GO:0010091|trichome branching	GO:0010997|anaphase-promoting complex binding;GO:0097027|ubiquitin-protein transferase activator activityGO:0005515|protein binding	GO:0005634|nucleus	K03364|CDH1; cell division cycle 20-like protein 1, cofactor of APC complex	map04110|Cell cycle;map04111|Cell cycle - yeast;map04914|Progesterone-mediated oocyte maturation;map04120|Ubiquitin mediated proteolysis
evm.model.contig4.433	Protein.evm.model.contig4.433::evm.model.contig4.433	1230888-1231944[+]	gi|928530591|ref|XM_014228618.1|	63.9	E:2e-07	Bipolaris maydis ATCC 48331 hypothetical protein mRNA	XP_028505007.1	384	E:4e-131	hypothetical protein AA0111_g7334 [Alternaria arborescens]	PF05817.14	Ribophorin_II	Oligosaccharyltransferase subunit Ribophorin II	ENOG410XRF2	ribophorin II	GO:0007568|aging;GO:0006487|protein N-linked glycosylation;GO:0042493|response to drugGO:0006487|protein N-linked glycosylation	GO:0043022|ribosome binding	GO:0000421|autophagosome membrane;GO:0016021|integral component of membrane;GO:0008250|oligosaccharyltransferase complex;GO:0005791|rough endoplasmic reticulumGO:0008250|oligosaccharyltransferase complex;GO:0016021|integral component of membrane	K12667|SWP1, RPN2; oligosaccharyltransferase complex subunit delta (ribophorin II)	map04141|Protein processing in endoplasmic reticulum;map00513|Various types of N-glycan biosynthesis;map01100|Metabolic pathways;map00510|N-Glycan biosynthesis
evm.model.contig3.903	Protein.evm.model.contig3.903::evm.model.contig3.903	2355274-2357794[-]	gi|636588890|ref|XM_008027593.1|	603	E:2e-169	Setosphaeria turcica Et28A hypothetical protein partial mRNA	XP_028509421.1	566	E:0	Cullin-4B [Alternaria arborescens]	PF00888.22	Cullin	Cullin family	COG5647	cullin 1	GO:0009738|abscisic acid-activated signaling pathway;GO:0048825|cotyledon development;GO:0006281|DNA repair;GO:0009908|flower development;GO:0010154|fruit development;GO:0009755|hormone-mediated signaling pathway;GO:0048366|leaf development;GO:0010100|negative regulation of photomorphogenesis;GO:0009640|photomorphogenesis;GO:0043161|proteasome-mediated ubiquitin-dependent protein catabolic proces…	GO:0031625|ubiquitin protein ligase bindingGO:0031625|ubiquitin protein ligase binding;GO:0003723|RNA binding;GO:0004521|endoribonuclease activity	GO:0080008|Cul4-RING E3 ubiquitin ligase complex;GO:0031461|cullin-RING ubiquitin ligase complex;GO:0005829|cytosol;GO:0005634|nucleus;GO:0019005|SCF ubiquitin ligase complex;GO:0000151|ubiquitin ligase complex	K10609|CUL4; cullin 4	map04120|Ubiquitin mediated proteolysis;map03420|Nucleotide excision repair
evm.model.contig3.597	Protein.evm.model.contig3.597::evm.model.contig3.597	1555416-1557082[+]	gi|702073613|emb|FO905987.1|	263	E:4e-67	Leptosphaeria maculans lepidii ibcn84_scaffold00037 complete sequence	XP_018388382.1	879	E:0	cryptochrome-2 [Alternaria alternata]	PF00875.18	DNA_photolyase	DNA photolyase	COG0415	deoxyribo-dipyrimidine photolyase	GO:0032922|circadian regulation of gene expression;GO:0007623|circadian rhythm;GO:0043153|entrainment of circadian clock by photoperiod;GO:0042754|negative regulation of circadian rhythm;GO:0045892|negative regulation of transcription, DNA-templated;GO:0018298|protein-chromophore linkage;GO:0042752|regulation of circadian rhythm;GO:0009416|response to light stimulus	GO:0071949|FAD binding;GO:0009881|photoreceptor activity	GO:0005737|cytoplasm;GO:0005634|nucleus	K02295|CRY; cryptochrome	map04710|Circadian rhythm
evm.model.contig9.117	Protein.evm.model.contig9.117::evm.model.contig9.117	304565-305636[-]	gi|627818566|ref|XM_007683933.1|	339	E:3e-90	Bipolaris oryzae ATCC 44560 hypothetical protein partial mRNA	RYN62753.1	482	E:2e-169	hypothetical protein AA0118_g5030 [Alternaria tenuissima]	PF04756.13	OST3_OST6	OST3 / OST6 family, transporter family	ENOG410XR1F	tumor suppressor candidate 3	GO:0050890|cognition;GO:0015693|magnesium ion transport;GO:0018279|protein N-linked glycosylation via asparagine	GO:0015095|magnesium ion transmembrane transporter activity;GO:0062062|oligosaccharyltransferase complex binding	GO:0016021|integral component of membrane;GO:0005739|mitochondrion;GO:0008250|oligosaccharyltransferase complex	K12669|OST3, OST6; oligosaccharyltransferase complex subunit gamma	map04141|Protein processing in endoplasmic reticulum;map00513|Various types of N-glycan biosynthesis;map01100|Metabolic pathways;map00510|N-Glycan biosynthesis
evm.model.contig2.982	Protein.evm.model.contig2.982::evm.model.contig2.982	2508730-2509700[-]	gi|396492443|ref|XM_003843752.1|	549	E:1e-153	Leptosphaeria maculans JN3 similar to cleavage and polyadenylation specificity factor subunit 5 (LEMA_P014510.1) mRNA, complete cds	XP_018379695.1	520	E:0	cleavage and polyadenylation specificity factor, 25 kDa subunit [Alternaria alternata]	PF13869.6	NUDIX_2	Nucleotide hydrolase	ENOG410XS8Z	cleavage and polyadenylation specificity factor	GO:0006378|mRNA polyadenylation;GO:0006397|mRNA processing;GO:0006364|rRNA processingGO:0006378|mRNA polyadenylation	GO:0017091|AU-rich element binding;GO:0016787|hydrolase activity;GO:0046872|metal ion binding;GO:0003729|mRNA bindingGO:0003729|mRNA binding	GO:0005829|cytosol;GO:0005849|mRNA cleavage factor complexGO:0005849|mRNA cleavage factor complex	K14397|NUDT21, CPSF5, CFIM25; cleavage and polyadenylation specificity factor subunit 5	map03015|mRNA surveillance pathway
evm.model.contig2.1973	Protein.evm.model.contig2.1973::evm.model.contig2.1973	5055552-5057069[+]	gi|636587944|ref|XM_008027120.1|	1170	E:0	Setosphaeria turcica Et28A hypothetical protein partial mRNA	RYN55559.1	977	E:0	hypothetical protein AA0118_g8709 [Alternaria tenuissima]	PF01425.21	Amidase	Amidase	COG0154	Allows the formation of correctly charged Gln-tRNA(Gln) through the transamidation of misacylated Glu-tRNA(Gln) in organisms which lack glutaminyl-tRNA synthetase. The reaction takes place in the presence of glutamine and ATP through an activated gamma-phospho-Glu-tRNA(Gln) (By similarity)	GO:0009062|fatty acid catabolic process;GO:0052651|monoacylglycerol catabolic process	GO:0047372|acylglycerol lipase activity;GO:0004040|amidase activity;GO:0103073|anandamide amidohydrolase activity;GO:0017064|fatty acid amide hydrolase activity;GO:0102077|oleamide hydrolase activity	GO:0005789|endoplasmic reticulum membrane;GO:0000139|Golgi membrane;GO:0016021|integral component of membrane;GO:0031090|organelle membrane	K15528|FAAH; fatty acid amide hydrolase [EC:3.5.1.99]	map04723|Retrograde endocannabinoid signaling
evm.model.contig8.112	Protein.evm.model.contig8.112::evm.model.contig8.112	328322-330050[+]	gi|628070262|ref|XM_007701595.1|	658	E:0	Cochliobolus sativus ND90Pr hypothetical protein mRNA	RYN80554.1	769	E:0	hypothetical protein AA0120_g10400 [Alternaria tenuissima]	PF07859.13	Abhydrolase_3	alpha/beta hydrolase fold	COG0657	alpha beta hydrolase fold-3 domain protein	GO:0008203|cholesterol metabolic process;GO:0016042|lipid catabolic process;GO:0006363|termination of RNA polymerase I transcription;GO:0006361|transcription initiation from RNA polymerase I promoter;GO:0019433|triglyceride catabolic process	GO:0033878|hormone-sensitive lipase activity;GO:0016298|lipase activity;GO:0042134|rRNA primary transcript bindingGO:0016787|hydrolase activity	GO:0005901|caveola;GO:0005737|cytoplasm;GO:0005829|cytosol;GO:0005811|lipid droplet;GO:0005739|mitochondrion;GO:0005634|nucleus	K07188|LIPE, HSL; hormone-sensitive lipase [EC:3.1.1.79]	map04923|Regulation of lipolysis in adipocytes;map04910|Insulin signaling pathway;map04152|AMPK signaling pathway;map04925|Aldosterone synthesis and secretion;map04024|cAMP signaling pathway
evm.model.contig6.382	Protein.evm.model.contig6.382::evm.model.contig6.382	1027294-1028799[-]	gi|636589966|ref|XM_008028131.1|	870	E:0	Setosphaeria turcica Et28A hypothetical protein mRNA	XP_018382838.1	748	E:0	oxalate decarboxylase oxdD [Alternaria alternata]	PF00190.22	Cupin_1	Cupin	COG2140	Oxalate decarboxylase	GO:0033609|oxalate metabolic process	GO:0046872|metal ion binding;GO:0045735|nutrient reservoir activity;GO:0046564|oxalate decarboxylase activityGO:0045735|nutrient reservoir activity	GO:0005737|cytoplasm	K01569|oxdD; oxalate decarboxylase [EC:4.1.1.2]	map01100|Metabolic pathways;map00630|Glyoxylate and dicarboxylate metabolism
evm.model.contig3.407	Protein.evm.model.contig3.407::evm.model.contig3.407	1046299-1048643[+]	gi|189196807|ref|XM_001934707.1|	1437	E:0	Pyrenophora tritici-repentis Pt-1C-BFP glycerol-3-phosphate dehydrogenase, mitochondrial precursor, mRNA	XP_018383668.1	1310	E:0	DAO-domain-containing protein [Alternaria alternata]	PF01266.24	DAO	FAD dependent oxidoreductase	COG0578	glycerol-3-phosphate dehydrogenase	GO:0019563|glycerol catabolic process;GO:0046168|glycerol-3-phosphate catabolic processGO:0055114|oxidation-reduction process	GO:0005509|calcium ion binding;GO:0004368|glycerol-3-phosphate dehydrogenase (quinone) activity;GO:0004367|glycerol-3-phosphate dehydrogenase [NAD+] activity;GO:0052591|sn-glycerol-3-phosphate:ubiquinone-8 oxidoreductase activityGO:0016491|oxidoreductase activity	GO:0009331|glycerol-3-phosphate dehydrogenase complex;GO:0005739|mitochondrion	K00111|glpA, glpD; glycerol-3-phosphate dehydrogenase [EC:1.1.5.3]	map01110|Biosynthesis of secondary metabolites;map00564|Glycerophospholipid metabolism
evm.model.contig9.855	Protein.evm.model.contig9.855::evm.model.contig9.855	2295599-2296793[-]	gi|628065221|ref|XM_007699559.1|	427	E:8e-117	Cochliobolus sativus ND90Pr hypothetical protein partial mRNA	RYO55586.1	580	E:0	hypothetical protein AA0113_g8734 [Alternaria arborescens]	PF17772.1	zf-MYST	MYST family zinc finger domain	COG5027	histone acetyltransferase	GO:0001708|cell fate specification;GO:0007275|multicellular organism development;GO:0009996|negative regulation of cell fate specification;GO:0045892|negative regulation of transcription, DNA-templated;GO:0045944|positive regulation of transcription by RNA polymerase II;GO:0071168|protein localization to chromatinGO:0006355|regulation of transcription, DNA-templated;GO:0016573|histone acetylation	GO:0010485|H4 histone acetyltransferase activity;GO:0004402|histone acetyltransferase activity;GO:0042393|histone binding;GO:0046872|metal ion bindingGO:0004402|histone acetyltransferase activity	GO:0000123|histone acetyltransferase complex;GO:0000790|nuclear chromatin;GO:0005634|nucleus;GO:0032777|Piccolo NuA4 histone acetyltransferase complex	K11304|TIP60, KAT5, ESA1; histone acetyltransferase HTATIP [EC:2.3.1.48]	map05166|HTLV-I infection
evm.model.contig5.68	Protein.evm.model.contig5.68::evm.model.contig5.68	208315-211926[+]	gi|702066582|emb|FO905662.1|	183	E:5e-43	Leptosphaeria biglobosa brassicae b35_scaffold00002 complete sequence	RYN24004.1	630	E:0	hypothetical protein AA0115_g8427 [Alternaria tenuissima]	PF06963.12	FPN1	Ferroportin1 (FPN1)	ENOG410XS3F	solute carrier family 40 (iron-regulated transporter), member 1	GO:0055072|iron ion homeostasis;GO:0034755|iron ion transmembrane transport;GO:0006826|iron ion transportGO:0034755|iron ion transmembrane transport	GO:0005381|iron ion transmembrane transporter activity;GO:0017046|peptide hormone bindingGO:0005381|iron ion transmembrane transporter activity	GO:0016323|basolateral plasma membrane;GO:0016021|integral component of membraneGO:0016021|integral component of membrane	K14685|SLC40A1, FPN1; solute carrier family 40 (iron-regulated transporter), member 1	map04978|Mineral absorption
evm.model.contig5.776	Protein.evm.model.contig5.776::evm.model.contig5.776	2054013-2055225[+]	gi|702073521|emb|FO905895.1|	412	E:3e-112	Leptosphaeria biglobosa Thlaspii ibcn65_scaffold00006 complete sequence	XP_028507280.1	678	E:0	hypothetical protein AA0111_g5125 [Alternaria arborescens]	PF01137.21	RTC	RNA 3'-terminal phosphate cyclase	COG0430	Catalyzes the conversion of 3'-phosphate to a 2',3'- cyclic phosphodiester at the end of RNA. The mechanism of action of the enzyme occurs in 3 steps (A) adenylation of the enzyme by ATP	GO:0000480|endonucleolytic cleavage in 5'-ETS of tricistronic rRNA transcript (SSU-rRNA, 5.8S rRNA, LSU-rRNA);GO:0000447|endonucleolytic cleavage in ITS1 to separate SSU-rRNA from 5.8S rRNA and LSU-rRNA from tricistronic rRNA transcript (SSU-rRNA, 5.8S rRNA, LSU-rRNA);GO:0006364|rRNA processing	GO:0004521|endoribonuclease activity	GO:0005730|nucleolus	K11108|RCL1; RNA 3'-terminal phosphate cyclase-like protein	map03008|Ribosome biogenesis in eukaryotes
evm.model.contig5.930	Protein.evm.model.contig5.930::evm.model.contig5.930	2428687-2430052[-]	gi|628073686|ref|XM_007703307.1|	979	E:0	Cochliobolus sativus ND90Pr hypothetical protein mRNA	XP_018387115.1	783	E:0	UBC-like protein [Alternaria alternata]	PF00179.26	UQ_con	Ubiquitin-conjugating enzyme	COG5078	ubiquitin-conjugating enzyme	GO:0006915|apoptotic process;GO:0043066|negative regulation of apoptotic process;GO:0043065|positive regulation of apoptotic process;GO:0006511|ubiquitin-dependent protein catabolic process	GO:0005524|ATP binding;GO:0004869|cysteine-type endopeptidase inhibitor activity;GO:0061631|ubiquitin conjugating enzyme activity	GO:0005829|cytosol;GO:0005654|nucleoplasm;GO:0005634|nucleus	K10585|UBE2Z; ubiquitin-conjugating enzyme E2 Z [EC:2.3.2.23]	map04120|Ubiquitin mediated proteolysis
evm.model.contig2.1420	Protein.evm.model.contig2.1420::evm.model.contig2.1420	3609678-3613122[+]	gi|189205942|ref|XM_001939271.1|	658	E:0	Pyrenophora tritici-repentis Pt-1C-BFP DNA damage-binding protein 1, mRNA	XP_018385529.1	1922	E:0	DNA damage-binding protein 1 [Alternaria alternata]	PF10433.9	MMS1_N	Mono-functional DNA-alkylating methyl methanesulfonate N-term	ENOG410XPF6	DNA- binding protein	GO:0006281|DNA repair;GO:0043161|proteasome-mediated ubiquitin-dependent protein catabolic process	GO:0003684|damaged DNA bindingGO:0003676|nucleic acid binding	GO:0005634|nucleusGO:0005634|nucleus	K10610|DDB1; DNA damage-binding protein 1	map04120|Ubiquitin mediated proteolysis;map05161|Hepatitis B;map05203|Viral carcinogenesis;map03420|Nucleotide excision repair
evm.model.contig3.599	Protein.evm.model.contig3.599::evm.model.contig3.599	1558639-1559364[-]	gi|928529261|ref|XM_014227953.1|	385	E:4e-104	Bipolaris maydis ATCC 48331 hypothetical protein partial mRNA	XP_028507888.1	439	E:2e-149	hypothetical protein AA0111_g4221 [Alternaria arborescens]	PF05502.13	Dynactin_p62	Dynactin p62 family	ENOG410ZCK8	DyNactin	GO:0007097|nuclear migration	GO:0047485|protein N-terminus binding	GO:0005938|cell cortex;GO:0005813|centrosome;GO:0005868|cytoplasmic dynein complex;GO:0005869|dynactin complex;GO:0000776|kinetochore;GO:0030017|sarcomere;GO:0000922|spindle poleGO:0005869|dynactin complex	K10426|DCTN4; dynactin 4	map04962|Vasopressin-regulated water reabsorption;map05016|Huntington's disease
evm.model.contig7.920	Protein.evm.model.contig7.920::evm.model.contig7.920	2332005-2333691[-]	gi|189205472|ref|XM_001939036.1|	468	E:7e-129	Pyrenophora tritici-repentis Pt-1C-BFP sensor protein rcsC, mRNA	RYO33249.1	850	E:0	hypothetical protein AG0111_g10645 [Alternaria gaisen]	PF02518.26	HATPase_c	Histidine kinase-, DNA gyrase B-, and HSP90-like ATPase	COG0784	response regulator	GO:0071310|cellular response to organic substance;GO:0000160|phosphorelay signal transduction system;GO:0046777|protein autophosphorylation;GO:0006468|protein phosphorylation;GO:0042542|response to hydrogen peroxide	GO:0005524|ATP binding;GO:0009927|histidine phosphotransfer kinase activity;GO:0000155|phosphorelay sensor kinase activity	GO:0016021|integral component of membrane;GO:0005886|plasma membrane	K07678|barA; two-component system, NarL family, sensor histidine kinase BarA [EC:2.7.13.3]	map02020|Two-component system
evm.model.contig2.962	Protein.evm.model.contig2.962::evm.model.contig2.962	2454584-2455366[+]	gi|636594510|ref|XM_008030403.1|	340	E:7e-91	Setosphaeria turcica Et28A hypothetical protein partial mRNA	RYN71450.1	335	E:2e-112	hypothetical protein AA0117_g9455 [Alternaria alternata]	PF01652.18	IF4E	Eukaryotic initiation factor 4E	COG5053	eukaryotic translation initiation factor	GO:0001701|in utero embryonic development;GO:0017148|negative regulation of translationGO:0006413|translational initiation	GO:0000340|RNA 7-methylguanosine cap binding;GO:0003743|translation initiation factor activity;GO:0031625|ubiquitin protein ligase bindingGO:0003723|RNA binding;GO:0003743|translation initiation factor activity	GO:0016281|eukaryotic translation initiation factor 4F complex;GO:0005845|mRNA cap binding complexGO:0005737|cytoplasm	K03259|EIF4E; translation initiation factor 4E	map04066|HIF-1 signaling pathway;map04150|mTOR signaling pathway;map04151|PI3K-Akt signaling pathway;map04910|Insulin signaling pathway;map03013|RNA transport
evm.model.contig1.1864	Protein.evm.model.contig1.1864::evm.model.contig1.1864	4673546-4674909[+]	gi|189201586|ref|XM_001937095.1|	388	E:4e-105	Pyrenophora tritici-repentis Pt-1C-BFP NADH-cytochrome b5 reductase 3, mRNA	OWY42722.1	427	E:1e-144	NADH-cytochrome b5 reductase 3 [Alternaria alternata]	PF00173.28	Cyt-b5	Cytochrome b5-like Heme/Steroid binding domain	COG0543	cytochrome-b5 reductase activity, acting on NAD(P)H	GO:0055114|oxidation-reduction process	GO:0004128|cytochrome-b5 reductase activity, acting on NAD(P)HGO:0016491|oxidoreductase activity	GO:0005789|endoplasmic reticulum membrane;GO:0016021|integral component of membrane;GO:0005741|mitochondrial outer membrane	K00326|E1.6.2.2; cytochrome-b5 reductase [EC:1.6.2.2]	map00520|Amino sugar and nucleotide sugar metabolism
evm.model.contig5.28	Protein.evm.model.contig5.28::evm.model.contig5.28	102792-104269[-]	gi|255953272|ref|XM_002567343.1|	69.4	E:7e-09	Penicillium chrysogenum Wisconsin 54-1255 hypothetical protein (Pc21g03250) mRNA, complete cds	RYN23915.1	721	E:0	hypothetical protein AA0115_g8465 [Alternaria tenuissima]	PF00155.21	Aminotran_1_2	Aminotransferase class I and II	COG0436	aminotransferase	GO:0009058|biosynthetic processGO:0009058|biosynthetic process	GO:0004069|L-aspartate:2-oxoglutarate aminotransferase activity;GO:0030170|pyridoxal phosphate bindingGO:0030170|pyridoxal phosphate binding	GO:0005737|cytoplasm	K00812|aspB; aspartate aminotransferase [EC:2.6.1.1]	map00350|Tyrosine metabolism;map01210|2-Oxocarboxylic acid metabolism;map01230|Biosynthesis of amino acids;map00250|Alanine, aspartate and glutamate metabolism;map00950|Isoquinoline alkaloid biosynthesis;map00400|Phenylalanine, tyrosine and tryptophan biosynthesis;map00401|Novobiocin biosynthesis;map00330|Arginine and proline metabolism;map00960|Tropane, piperidine and pyridine alkaloid biosynthe…
evm.model.contig3.289	Protein.evm.model.contig3.289::evm.model.contig3.289	767471-768450[-]	gi|189195645|ref|XM_001934126.1|	496	E:1e-137	Pyrenophora tritici-repentis Pt-1C-BFP polyadenylate-binding protein 2 (Poly(A)-binding protein 2), mRNA	XP_018383538.1	258	E:4e-84	RNA-binding domain-containing protein [Alternaria alternata]	PF00076.22	RRM_1	RNA recognition motif. (a.k.a. RRM, RBD, or RNP domain)	ENOG4111PFV	Polyadenylate-binding protein	GO:0006378|mRNA polyadenylation;GO:0000398|mRNA splicing, via spliceosome;GO:0000289|nuclear-transcribed mRNA poly(A) tail shortening;GO:0060050|positive regulation of protein glycosylation	GO:0003729|mRNA binding;GO:0008143|poly(A) binding;GO:0003723|RNA bindingGO:0003676|nucleic acid binding	GO:0071013|catalytic step 2 spliceosome;GO:0005737|cytoplasm;GO:0005634|nucleus;GO:0071011|precatalytic spliceosome	K14396|PABPN1, PABP2; polyadenylate-binding protein 2	map05164|Influenza A;map03015|mRNA surveillance pathway
evm.model.contig2.1997	Protein.evm.model.contig2.1997::evm.model.contig2.1997	5095177-5096594[-]	gi|627820216|ref|XM_007684758.1|	433	E:2e-118	Bipolaris oryzae ATCC 44560 hypothetical protein partial mRNA	RYO34281.1	371	E:2e-123	hypothetical protein AG0111_g10124 [Alternaria gaisen]	PF00441.24	Acyl-CoA_dh_1	Acyl-CoA dehydrogenase, C-terminal domain	ENOG410XNTS	acyl-CoA dehydrogenase	GO:0006631|fatty acid metabolic process;GO:0048767|root hair elongationGO:0055114|oxidation-reduction process	GO:0050660|flavin adenine dinucleotide binding;GO:0016627|oxidoreductase activity, acting on the CH-CH group of donorsGO:0016627|oxidoreductase activity, acting on the CH-CH group of donors	GO:0005777|peroxisome	K00249|ACADM, acd; acyl-CoA dehydrogenase [EC:1.3.8.7]	map01200|Carbon metabolism;map00280|Valine, leucine and isoleucine degradation;map01212|Fatty acid metabolism;map00640|Propanoate metabolism;map00071|Fatty acid degradation;map00410|beta-Alanine metabolism;map03320|PPAR signaling pathway;map01110|Biosynthesis of secondary metabolites;map01100|Metabolic pathways;map01130|Biosynthesis of antibiotics
evm.model.contig1.1628	Protein.evm.model.contig1.1628::evm.model.contig1.1628	4039702-4041321[-]	gi|367031673|ref|XM_003665072.1|	272	E:6e-70	Myceliophthora thermophila ATCC 42464 hypothetical protein (MYCTH_2308492) mRNA, complete cds	OWY42317.1	866	E:0	succinyl-CoA:3-ketoacid-coenzyme A transferas-like protein [Alternaria alternata]	PF01144.23	CoA_trans	Coenzyme A transferase	COG1788	Key enzyme for ketone body catabolism. Transfers the CoA moiety from succinate to acetoacetate. Formation of the enzyme-CoA intermediate proceeds via an unstable anhydride species formed between the carboxylate groups of the enzyme and substrate (By similarity)	GO:0046950|cellular ketone body metabolic process;GO:0046952|ketone body catabolic process	GO:0008260|3-oxoacid CoA-transferase activity;GO:0042803|protein homodimerization activityGO:0008410|CoA-transferase activity	GO:0005739|mitochondrion	K01027|OXCT; 3-oxoacid CoA-transferase [EC:2.8.3.5]	map00280|Valine, leucine and isoleucine degradation;map00650|Butanoate metabolism;map00072|Synthesis and degradation of ketone bodies
evm.model.contig1.1558	Protein.evm.model.contig1.1558::evm.model.contig1.1558	3802904-3806073[+]	gi|928520715|ref|XM_014223680.1|	774	E:0	Bipolaris maydis ATCC 48331 glycoside hydrolase family 3 protein partial mRNA	XP_018389542.1	1513	E:0	glycoside hydrolase [Alternaria alternata]	PF00933.21	Glyco_hydro_3	Glycosyl hydrolase family 3 N terminal domain	COG1472	hydrolase family 3	GO:0005975|carbohydrate metabolic process;GO:0071555|cell wall organization;GO:0009252|peptidoglycan biosynthetic process;GO:0009254|peptidoglycan turnover;GO:0008360|regulation of cell shapeGO:0005975|carbohydrate metabolic process	GO:0004563|beta-N-acetylhexosaminidase activity;GO:0102148|N-acetyl-beta-D-galactosaminidase activityGO:0004553|hydrolase activity, hydrolyzing O-glycosyl compounds	GO:0005618|cell wall;GO:0005576|extracellular region;GO:0005886|plasma membrane	K01207|nagZ; beta-N-acetylhexosaminidase [EC:3.2.1.52]	map01100|Metabolic pathways;map01501|beta-Lactam resistance;map00531|Glycosaminoglycan degradation;map00520|Amino sugar and nucleotide sugar metabolism;map00770|Pantothenate and CoA biosynthesis
evm.model.contig10.529	Protein.evm.model.contig10.529::evm.model.contig10.529	1360994-1363467[+]	gi|953431260|ref|XM_014702216.1|	549	E:3e-153	Bipolaris victoriae FI3 hypothetical protein partial mRNA	RYN95550.1	943	E:0	hypothetical protein AA0119_g8507 [Alternaria tenuissima]	PF13417.6	GST_N_3	Glutathione S-transferase, N-terminal domain	ENOG410XSIX	glutathione Stransferase	GO:0071243|cellular response to arsenic-containing substance;GO:1901687|glutathione derivative biosynthetic process;GO:0035722|interleukin-12-mediated signaling pathway;GO:0019852|L-ascorbic acid metabolic process;GO:0032259|methylation;GO:0060315|negative regulation of ryanodine-sensitive calcium-release channel activity;GO:0055114|oxidation-reduction process;GO:0060316|positive regulation of ry…	GO:0045174|glutathione dehydrogenase (ascorbate) activity;GO:0004364|glutathione transferase activity;GO:0050610|methylarsonate reductase activity;GO:0016491|oxidoreductase activityGO:0005515|protein binding	GO:0005737|cytoplasm;GO:0005829|cytosol;GO:0070062|extracellular exosome	K00799|GST, gst; glutathione S-transferase [EC:2.5.1.18]	map05204|Chemical carcinogenesis;map00982|Drug metabolism - cytochrome P450;map00480|Glutathione metabolism;map00980|Metabolism of xenobiotics by cytochrome P450
evm.model.contig9.558	Protein.evm.model.contig9.558::evm.model.contig9.558	1484275-1486653[-]	gi|702073675|emb|FO906022.1|	675	E:0	Leptosphaeria maculans lepidii ibcn84_scaffold00002 complete sequence	RII18185.1	944	E:0	hypothetical protein CUC08_Gglean002275 [Alternaria sp. MG1]	PF04811.15	Sec23_trunk	Sec23/Sec24 trunk domain	COG5028	SEC24 family, member	GO:0006888|endoplasmic reticulum to Golgi vesicle-mediated transport;GO:0006886|intracellular protein transportGO:0006886|intracellular protein transport;GO:0006888|endoplasmic reticulum to Golgi vesicle-mediated transport	GO:0008270|zinc ion binding	GO:0030127|COPII vesicle coat;GO:0005789|endoplasmic reticulum membrane;GO:0000139|Golgi membraneGO:0030127|COPII vesicle coat	K14007|SEC24; protein transport protein SEC24	map04141|Protein processing in endoplasmic reticulum
evm.model.contig1.1661	Protein.evm.model.contig1.1661::evm.model.contig1.1661	4141070-4141929[+]	gi|189208517|ref|XM_001940557.1|	322	E:3e-85	Pyrenophora tritici-repentis Pt-1C-BFP conserved hypothetical protein, mRNA	OWY42348.1	387	E:4e-133	mtDNA inheritance protein dml1 [Alternaria alternata]	PF06487.12	SAP18	Sin3 associated polypeptide p18 (SAP18)	ENOG4111FBB	histone deacetylase complex subunit	GO:0006342|chromatin silencing;GO:0000398|mRNA splicing, via spliceosome;GO:0007275|multicellular organism development;GO:0045892|negative regulation of transcription, DNA-templated	GO:0003714|transcription corepressor activity;GO:0008134|transcription factor binding	GO:0071013|catalytic step 2 spliceosome;GO:0005737|cytoplasm;GO:0071011|precatalytic spliceosome;GO:0016580|Sin3 complex	K14324|SAP18; histone deacetylase complex subunit SAP18	map03015|mRNA surveillance pathway;map03013|RNA transport
evm.model.contig4.480	Protein.evm.model.contig4.480::evm.model.contig4.480	1351371-1354179[+]	gi|628222027|ref|XM_007716809.1|	822	E:0	Bipolaris zeicola 26-R-13 hypothetical protein partial mRNA	XP_018391707.1	1345	E:0	phosphatidylinositol 3-kinase [Alternaria alternata]	PF00792.24	PI3K_C2	Phosphoinositide 3-kinase C2	COG5032	phosphatidylinositol kinase activity	GO:0000045|autophagosome assembly;GO:0030242|autophagy of peroxisome;GO:0006897|endocytosis;GO:0046854|phosphatidylinositol phosphorylation;GO:0036092|phosphatidylinositol-3-phosphate biosynthetic process;GO:0048015|phosphatidylinositol-mediated signaling;GO:0006468|protein phosphorylation	GO:0016303|1-phosphatidylinositol-3-kinase activity;GO:0005524|ATP binding	GO:0005737|cytoplasm;GO:0005768|endosome;GO:0016020|membrane;GO:0005777|peroxisome;GO:0000407|phagophore assembly site;GO:0034271|phosphatidylinositol 3-kinase complex, class III, type I;GO:0034272|phosphatidylinositol 3-kinase complex, class III, type II	K00914|PIK3C3, VPS34; phosphatidylinositol 3-kinase [EC:2.7.1.137]	map00562|Inositol phosphate metabolism;map04145|Phagosome;map04070|Phosphatidylinositol signaling system;map04140|Regulation of autophagy;map05152|Tuberculosis;map01100|Metabolic pathways
evm.model.contig1.1171	Protein.evm.model.contig1.1171::evm.model.contig1.1171	2866697-2868036[-]	gi|189210366|ref|XM_001941480.1|	279	E:2e-72	Pyrenophora tritici-repentis Pt-1C-BFP conserved hypothetical protein, mRNA	XP_018389156.1	274	E:7e-87	P-loop containing nucleoside triphosphate hydrolase protein [Alternaria alternata]	PF06745.13	ATPase	KaiC	COG0468	Can catalyze the hydrolysis of ATP in the presence of single-stranded DNA, the ATP-dependent uptake of single-stranded DNA by duplex DNA, and the ATP-dependent hybridization of homologous single-stranded DNAs. It interacts with LexA causing its activation and leading to its autocatalytic cleavage (By similarity)	GO:0006281|DNA repair;GO:0000724|double-strand break repair via homologous recombination;GO:1900426|positive regulation of defense response to bacterium;GO:0016444|somatic cell DNA recombination;GO:0042148|strand invasion;GO:0000723|telomere maintenance	GO:0005524|ATP binding;GO:0008094|DNA-dependent ATPase activity;GO:0003697|single-stranded DNA binding	GO:0005813|centrosome;GO:0000784|nuclear chromosome, telomeric region;GO:0033063|Rad51B-Rad51C-Rad51D-XRCC2 complex;GO:0005657|replication fork	K10871|RAD51L3, RAD51D; RAD51-like protein 3	map03440|Homologous recombination
evm.model.contig7.882	Protein.evm.model.contig7.882::evm.model.contig7.882	2235634-2236277[-]	gi|169601777|ref|XM_001794259.1|	207	E:6e-51	Phaeosphaeria nodorum SN15 hypothetical protein partial mRNA	XP_018386357.1	297	E:2e-98	UDP-glucose 4-epimerase [Alternaria alternata]	PF01370.21	Epimerase	NAD dependent epimerase/dehydratase family	COG0451	Nad-dependent epimerase dehydratase	GO:0006695|cholesterol biosynthetic process;GO:0008203|cholesterol metabolic process;GO:0001942|hair follicle development;GO:0060716|labyrinthine layer blood vessel development;GO:0007224|smoothened signaling pathwayGO:0006694|steroid biosynthetic process;GO:0055114|oxidation-reduction process	GO:0003854|3-beta-hydroxy-delta5-steroid dehydrogenase activity;GO:0103066|4alpha-carboxy-4beta-methyl-5alpha-cholesta-8-en-3beta-ol:NAD(P)+ 3-oxidoreductase (decarboxylating) activity;GO:0103067|4alpha-carboxy-5alpha-cholesta-8-en-3beta-ol:NAD(P)+ 3-dehydrogenase (decarboxylating) activity;GO:0016491|oxidoreductase activity;GO:0016616|oxidoreductase activity, acting on the CH-OH group of donors,…	GO:0005783|endoplasmic reticulum;GO:0005789|endoplasmic reticulum membrane;GO:0016021|integral component of membrane;GO:0005811|lipid droplet	K07748|E1.1.1.170, NSDHL, ERG26; sterol-4alpha-carboxylate 3-dehydrogenase (decarboxylating) [EC:1.1.1.170]	map00100|Steroid biosynthesis;map01100|Metabolic pathways;map01130|Biosynthesis of antibiotics
evm.model.contig2.1403	Protein.evm.model.contig2.1403::evm.model.contig2.1403	3577729-3579569[-]	gi|189205728|ref|XM_001939164.1|	124	E:2e-25	Pyrenophora tritici-repentis Pt-1C-BFP succinyl-CoA ligase subunit alpha, mRNA	RYN75171.1	934	E:0	hypothetical protein AA0117_g6509 [Alternaria alternata]	PF13607.6	Succ_CoA_lig	Succinyl-CoA ligase like flavodoxin domain	COG0074	Succinyl-CoA ligase ADP-forming subunit alpha	GO:0009142|nucleoside triphosphate biosynthetic process;GO:0006105|succinate metabolic process;GO:0006104|succinyl-CoA metabolic process;GO:0006099|tricarboxylic acid cycle	GO:0048037|cofactor binding;GO:0004550|nucleoside diphosphate kinase activity;GO:0000166|nucleotide binding;GO:0004775|succinate-CoA ligase (ADP-forming) activityGO:0003824|catalytic activity	GO:0005829|cytosol;GO:0005739|mitochondrion	K01899|LSC1; succinyl-CoA synthetase alpha subunit [EC:6.2.1.4 6.2.1.5]	map01200|Carbon metabolism;map00020|Citrate cycle (TCA cycle);map00640|Propanoate metabolism;map01110|Biosynthesis of secondary metabolites;map01100|Metabolic pathways;map01120|Microbial metabolism in diverse environments;map01130|Biosynthesis of antibiotics
evm.model.contig6.643	Protein.evm.model.contig6.643::evm.model.contig6.643	1683990-1687202[+]	gi|189197830|ref|XM_001935218.1|	507	E:3e-140	Pyrenophora tritici-repentis Pt-1C-BFP DNA mismatch repair protein PMS1, mRNA	XP_018384804.1	1799	E:0	DNA mismatch repair protein-like protein pms1 [Alternaria alternata]	PF02518.26	HATPase_c	Histidine kinase-, DNA gyrase B-, and HSP90-like ATPase	COG0323	This protein is involved in the repair of mismatches in DNA. It is required for dam-dependent methyl-directed DNA mismatch repair. May act as a molecular matchmaker , a protein that promotes the formation of a stable complex between two or more DNA-binding proteins in an ATP-dependent manner without itself being part of a final effector complex (By similarity)	GO:0006298|mismatch repair;GO:0007095|mitotic G2 DNA damage checkpoint;GO:0030890|positive regulation of B cell proliferation;GO:0016446|somatic hypermutation of immunoglobulin genesGO:0006298|mismatch repair	GO:0005524|ATP binding;GO:0016887|ATPase activity;GO:0004519|endonuclease activity;GO:0032407|MutSalpha complex binding;GO:0032138|single base insertion or deletion binding;GO:0003697|single-stranded DNA bindingGO:0005524|ATP binding;GO:0030983|mismatched DNA binding	GO:0036464|cytoplasmic ribonucleoprotein granule;GO:0005829|cytosol;GO:0015630|microtubule cytoskeleton;GO:0032300|mismatch repair complex;GO:0032389|MutLalpha complex;GO:0005654|nucleoplasm;GO:0005886|plasma membrane	K10858|PMS2; DNA mismatch repair protein PMS2	map03460|Fanconi anemia pathway;map03430|Mismatch repair
evm.model.contig8.148	Protein.evm.model.contig8.148::evm.model.contig8.148	434497-435475[-]	gi|627820370|ref|XM_007684835.1|	497	E:6e-138	Bipolaris oryzae ATCC 44560 hypothetical protein partial mRNA	XP_028502829.1	544	E:0	hypothetical protein AA0111_g9598 [Alternaria arborescens]	PF05153.15	MIOX	Myo-inositol oxygenase	ENOG410XQ4J	inositol oxygenase	GO:0019310|inositol catabolic processGO:0019310|inositol catabolic process;GO:0055114|oxidation-reduction process	GO:0008199|ferric iron binding;GO:0050113|inositol oxygenase activityGO:0005506|iron ion binding;GO:0050113|inositol oxygenase activity	GO:0005737|cytoplasmGO:0005737|cytoplasm	K00469|MIOX; inositol oxygenase [EC:1.13.99.1]	map00562|Inositol phosphate metabolism;map00053|Ascorbate and aldarate metabolism
evm.model.contig1.83	Protein.evm.model.contig1.83::evm.model.contig1.83	234848-236737[-]	gi|189205051|ref|XM_001938826.1|	804	E:0	Pyrenophora tritici-repentis Pt-1C-BFP hypothetical protein, mRNA	RYN39371.1	592	E:0	Intron-binding protein aquarius [Alternaria tenuissima]	PF16399.5	Aquarius_N	Intron-binding protein aquarius N-terminus	ENOG410XPV8	Aquarius homolog (Mouse)	GO:0000398|mRNA splicing, via spliceosome	GO:0005524|ATP binding;GO:0003729|mRNA binding;GO:0003723|RNA binding;GO:0003724|RNA helicase activity	GO:0071013|catalytic step 2 spliceosome;GO:0005654|nucleoplasm;GO:0005634|nucleus;GO:0005681|spliceosomal complex;GO:0071007|U2-type catalytic step 2 spliceosome	K12874|AQR; intron-binding protein aquarius	map03040|Spliceosome
evm.model.contig1.189	Protein.evm.model.contig1.189::evm.model.contig1.189	495197-496544[+]	gi|636596658|ref|XM_008031477.1|	425	E:4e-116	Setosphaeria turcica Et28A hypothetical protein partial mRNA	XP_018381750.1	733	E:0	aldose 1-epimerase [Alternaria alternata]	PF01263.20	Aldose_epim	Aldose 1-epimerase	COG2017	converts alpha-aldose to the beta-anomer. It is active on D-glucose, L-arabinose, D-xylose, D-galactose, maltose and lactose (By similarity)	GO:0019318|hexose metabolic processGO:0005975|carbohydrate metabolic process	GO:0004034|aldose 1-epimerase activity;GO:0030246|carbohydrate bindingGO:0016853|isomerase activity	GO:0005576|extracellular region	K01785|galM, GALM; aldose 1-epimerase [EC:5.1.3.3]	map00010|Glycolysis / Gluconeogenesis;map01110|Biosynthesis of secondary metabolites;map01100|Metabolic pathways;map01130|Biosynthesis of antibiotics;map01120|Microbial metabolism in diverse environments;map00052|Galactose metabolism;map00520|Amino sugar and nucleotide sugar metabolism
evm.model.contig4.900	Protein.evm.model.contig4.900::evm.model.contig4.900	2433788-2434643[-]	gi|953419124|ref|XM_014696148.1|	279	E:2e-72	Bipolaris victoriae FI3 hypothetical protein partial mRNA	RYN62460.1	254	E:4e-82	hypothetical protein AA0118_g5328 [Alternaria tenuissima]	PF01323.20	DSBA	DSBA-like thioredoxin domain	COG3917	dsbA oxidoreductase	GO:0006749|glutathione metabolic process	GO:0004602|glutathione peroxidase activity;GO:0004364|glutathione transferase activity;GO:0015035|protein disulfide oxidoreductase activityGO:0015035|protein disulfide oxidoreductase activity	GO:0005739|mitochondrion;GO:0005777|peroxisome	K13299|GSTK1; glutathione S-transferase kappa 1 [EC:2.5.1.18]	map05204|Chemical carcinogenesis;map00982|Drug metabolism - cytochrome P450;map00980|Metabolism of xenobiotics by cytochrome P450;map00480|Glutathione metabolism;map04146|Peroxisome
evm.model.contig2.1164	Protein.evm.model.contig2.1164::evm.model.contig2.1164	2976727-2978339[+]	gi|702073510|emb|FO905884.1|	281	E:1e-72	Leptosphaeria biglobosa Thlaspii ibcn65_scaffold00017 complete sequence	RII22045.1	796	E:0	hypothetical protein CUC08_Gglean001220 [Alternaria sp. MG1]	PF00282.19	Pyridoxal_deC	Pyridoxal-dependent decarboxylase conserved domain	COG0076	decarboxylase	GO:0015842|aminergic neurotransmitter loading into synaptic vesicle;GO:0042423|catecholamine biosynthetic process;GO:0006520|cellular amino acid metabolic process;GO:0071312|cellular response to alkaloid;GO:0035690|cellular response to drug;GO:0071363|cellular response to growth factor stimulus;GO:0007623|circadian rhythm;GO:0042416|dopamine biosynthetic process;GO:0042417|dopamine metabolic proc…	GO:0016597|amino acid binding;GO:0004058|aromatic-L-amino-acid decarboxylase activity;GO:0019899|enzyme binding;GO:0036468|L-dopa decarboxylase activity;GO:0019904|protein domain specific binding;GO:0030170|pyridoxal phosphate bindingGO:0016831|carboxy-lyase activity;GO:0030170|pyridoxal phosphate binding	GO:0030424|axon;GO:0005737|cytoplasm;GO:0043025|neuronal cell body;GO:0008021|synaptic vesicle	K01593|DDC; aromatic-L-amino-acid decarboxylase [EC:4.1.1.28]	map00380|Tryptophan metabolism;map01110|Biosynthesis of secondary metabolites;map00965|Betalain biosynthesis;map00950|Isoquinoline alkaloid biosynthesis;map00360|Phenylalanine metabolism;map04726|Serotonergic synapse;map00901|Indole alkaloid biosynthesis;map04728|Dopaminergic synapse;map05030|Cocaine addiction;map05031|Amphetamine addiction;map00350|Tyrosine metabolism;map01100|Metabolic pathways…
evm.model.contig4.115	Protein.evm.model.contig4.115::evm.model.contig4.115	344219-344590[+]	gi|953434324|ref|XM_014703748.1|	187	E:6e-45	Bipolaris victoriae FI3 hypothetical protein partial mRNA	RMZ69382.1	107	E:1e-25	WD repeat domain-containing [Pyrenophora seminiperda CCB06]	PF00400.32	WD40	WD domain, G-beta repeat	ENOG410XQ8I	Cell division cycle 20	GO:0031145|anaphase-promoting complex-dependent catabolic process;GO:0007049|cell cycle;GO:0051301|cell division;GO:0006281|DNA repair;GO:0070306|lens fiber cell differentiation;GO:0090344|negative regulation of cell aging;GO:0008284|positive regulation of cell population proliferation;GO:0045732|positive regulation of protein catabolic process;GO:1904668|positive regulation of ubiquitin protein …	GO:0010997|anaphase-promoting complex binding;GO:0097027|ubiquitin-protein transferase activator activityGO:0005515|protein binding	GO:0005680|anaphase-promoting complex;GO:0031965|nuclear membrane;GO:0005654|nucleoplasm	K03364|CDH1; cell division cycle 20-like protein 1, cofactor of APC complex	map04110|Cell cycle;map04111|Cell cycle - yeast;map04914|Progesterone-mediated oocyte maturation;map04120|Ubiquitin mediated proteolysis
evm.model.contig4.535	Protein.evm.model.contig4.535::evm.model.contig4.535	1498135-1499931[+]	gi|667649528|ref|XM_008598374.1|	139	E:7e-30	Beauveria bassiana ARSEF 2860 glycosyltransferase family 57 partial mRNA	RYO04750.1	822	E:0	Dolichyl pyrophosphate Glc1Man9GlcNAc2 alpha-1,3-glucosyltransferase [Alternaria tenuissima]	PF03155.15	Alg6_Alg8	ALG6, ALG8 glycosyltransferase family	ENOG410XPPM	Asparagine-linked glycosylation 8, alpha-1,3-glucosyltransferase homolog (S. cerevisiae)	GO:0006490|oligosaccharide-lipid intermediate biosynthetic process;GO:0006486|protein glycosylation	GO:0042283|dolichyl pyrophosphate Glc1Man9GlcNAc2 alpha-1,3-glucosyltransferase activityGO:0016758|transferase activity, transferring hexosyl groups	GO:0005789|endoplasmic reticulum membrane;GO:0016021|integral component of membraneGO:0005789|endoplasmic reticulum membrane	K03849|ALG8; alpha-1,3-glucosyltransferase [EC:2.4.1.265]	map01100|Metabolic pathways;map00510|N-Glycan biosynthesis
evm.model.contig3.287	Protein.evm.model.contig3.287::evm.model.contig3.287	764536-765621[-]	gi|628214159|ref|XM_007715583.1|	496	E:2e-137	Bipolaris zeicola 26-R-13 hypothetical protein partial mRNA	XP_018383536.1	400	E:7e-136	Pex19-domain-containing protein [Alternaria alternata]	PF04614.12	Pex19	Pex19 protein family	ENOG4111QGU	peroxisomal biogenesis factor 19	GO:0007031|peroxisome organization;GO:0015031|protein transport	GO:0042802|identical protein binding	GO:0005829|cytosol;GO:0005778|peroxisomal membraneGO:0005777|peroxisome	K13337|PEX19; peroxin-19	map04146|Peroxisome
evm.model.contig2.1791	Protein.evm.model.contig2.1791::evm.model.contig2.1791	4554445-4555046[-]	gi|636581950|ref|XM_008024123.1|	344	E:3e-92	Setosphaeria turcica Et28A hypothetical protein mRNA	XP_028506636.1	185	E:2e-58	hypothetical protein AA0111_g5861 [Alternaria arborescens]	PF05676.13	NDUF_B7	NADH-ubiquinone oxidoreductase B18 subunit (NDUFB7)	ENOG411230N	NADH dehydrogenase (ubiquinone) 1 beta subcomplex	GO:0009853|photorespiration	GO:0008137|NADH dehydrogenase (ubiquinone) activityGO:0003954|NADH dehydrogenase activity;GO:0008137|NADH dehydrogenase (ubiquinone) activity	GO:0005758|mitochondrial intermembrane space;GO:0031966|mitochondrial membrane;GO:0005747|mitochondrial respiratory chain complex I;GO:0005739|mitochondrion;GO:0045271|respiratory chain complex IGO:0005739|mitochondrion	K03963|NDUFB7; NADH dehydrogenase (ubiquinone) 1 beta subcomplex subunit 7	map05012|Parkinson's disease;map04932|Non-alcoholic fatty liver disease (NAFLD);map05016|Huntington's disease;map05010|Alzheimer's disease;map01100|Metabolic pathways;map00190|Oxidative phosphorylation
evm.model.contig5.856	Protein.evm.model.contig5.856::evm.model.contig5.856	2241798-2242187[-]	gi|702073521|emb|FO905895.1|	206	E:2e-50	Leptosphaeria biglobosa Thlaspii ibcn65_scaffold00006 complete sequence	RYO38767.1	168	E:1e-47	hypothetical protein AG0111_g7761 [Alternaria gaisen]	PF04912.14	Dynamitin	Dynamitin	ENOG410XSZK	dynactin 2 (p50)	GO:0007052|mitotic spindle organizationGO:0007017|microtubule-based process	GO:0003774|motor activity	GO:0005813|centrosome;GO:0005737|cytoplasm;GO:0005869|dynactin complex;GO:0030286|dynein complex;GO:0016020|membrane;GO:0005874|microtubule;GO:0031982|vesicleGO:0005869|dynactin complex	K10424|DCTN2; dynactin 2	map04962|Vasopressin-regulated water reabsorption;map05016|Huntington's disease
evm.model.contig2.413	Protein.evm.model.contig2.413::evm.model.contig2.413	1139779-1142331[-]	gi|628062375|ref|XM_007698653.1|	148	E:1e-32	Cochliobolus sativus ND90Pr hypothetical protein partial mRNA	RYN44580.1	550	E:0	Acetoacetyl-CoA synthetase [Alternaria tenuissima]	PF00501.28	AMP-binding	AMP-binding enzyme	COG0365	Catalyzes the conversion of acetate into acetyl-CoA (AcCoA), an essential intermediate at the junction of anabolic and catabolic pathways. AcsA undergoes a two-step reaction. In the first half reaction, AcsA combines acetate with ATP to form acetyl-adenylate (AcAMP) intermediate. In the second half reaction, it can then transfer the acetyl group from AcAMP to the sulfhydryl group of CoA, forming …	GO:0006631|fatty acid metabolic process	GO:0030729|acetoacetate-CoA ligase activity;GO:0005524|ATP bindingGO:0003824|catalytic activity	GO:0005829|cytosol	K01907|AACS, acsA; acetoacetyl-CoA synthetase [EC:6.2.1.16]	map00280|Valine, leucine and isoleucine degradation;map00650|Butanoate metabolism
evm.model.contig2.776	Protein.evm.model.contig2.776::evm.model.contig2.776	1958500-1960554[+]	gi|627826229|ref|XM_007687123.1|	1068	E:0	Bipolaris oryzae ATCC 44560 hypothetical protein partial mRNA	RII21821.1	1032	E:0	hypothetical protein CUC08_Gglean000989 [Alternaria sp. MG1]	PF02786.17	CPSase_L_D2	Carbamoyl-phosphate synthase L chain, ATP binding domain	COG4770	carboxylase	GO:0006552|leucine catabolic process	GO:0005524|ATP binding;GO:0046872|metal ion binding;GO:0004485|methylcrotonoyl-CoA carboxylase activityGO:0005524|ATP binding;GO:0008716|D-alanine-D-alanine ligase activity	GO:0005759|mitochondrial matrix;GO:0005739|mitochondrion	K01968|E6.4.1.4A; 3-methylcrotonyl-CoA carboxylase alpha subunit [EC:6.4.1.4]	map00280|Valine, leucine and isoleucine degradation;map01100|Metabolic pathways
evm.model.contig2.914	Protein.evm.model.contig2.914::evm.model.contig2.914	2344108-2345829[-]	gi|628191454|ref|XM_007710535.1|	915	E:0	Bipolaris zeicola 26-R-13 glycosyltransferase family 21 protein partial mRNA	OWY45990.1	1191	E:0	ceramide glucosyltransferase [Alternaria alternata]	PF13641.6	Glyco_tranf_2_3	Glycosyltransferase like family 2	COG1215	Glycosyl transferase, family 2	GO:0006665|sphingolipid metabolic process	GO:0008120|ceramide glucosyltransferase activity;GO:0102769|dihydroceramide glucosyltransferase activity	GO:0000139|Golgi membrane;GO:0016021|integral component of membrane	K00720|UGCG; ceramide glucosyltransferase [EC:2.4.1.80]	map01100|Metabolic pathways;map00600|Sphingolipid metabolism
evm.model.contig8.227	Protein.evm.model.contig8.227::evm.model.contig8.227	685219-687526[+]	gi|189193176|ref|XM_001932892.1|	1181	E:0	Pyrenophora tritici-repentis Pt-1C-BFP neutral ceramidase precursor, mRNA	OWY44645.1	1425	E:0	neutral ceramidase precursor [Alternaria alternata]	PF04734.13	Ceramidase_alk	Neutral/alkaline non-lysosomal ceramidase, N-terminal	ENOG410XQWE	Ceramidase	GO:0046514|ceramide catabolic process;GO:0042759|long-chain fatty acid biosynthetic process;GO:0046512|sphingosine biosynthetic process	GO:0102121|ceramidase activity;GO:0017040|N-acylsphingosine amidohydrolase activity	GO:0005783|endoplasmic reticulum;GO:0005576|extracellular region;GO:0005794|Golgi apparatus;GO:0009506|plasmodesma	K12349|ASAH2; neutral ceramidase [EC:3.5.1.23]	map04071|Sphingolipid signaling pathway;map01100|Metabolic pathways;map00600|Sphingolipid metabolism
evm.model.contig5.774	Protein.evm.model.contig5.774::evm.model.contig5.774	2049389-2051424[+]	gi|189203910|ref|XM_001938256.1|	1122	E:0	Pyrenophora tritici-repentis Pt-1C-BFP elongation factor 2, mRNA	KNG44111.1	1129	E:0	hypothetical protein TW65_09032 [Stemphylium lycopersici]	PF14492.6	EFG_II	Elongation Factor G, domain II	COG0480	Catalyzes the GTP-dependent ribosomal translocation step during translation elongation. During this step, the ribosome changes from the pre-translocational (PRE) to the post- translocational (POST) state as the newly formed A-site-bound peptidyl-tRNA and P-site-bound deacylated tRNA move to the P and E sites, respectively. Catalyzes the coordinated movement of the two tRNA molecules, the mRNA and…	GO:0000398|mRNA splicing, via spliceosome	GO:0005525|GTP binding;GO:0003924|GTPase activity;GO:0030623|U5 snRNA bindingGO:0005525|GTP binding	GO:0005829|cytosol;GO:0005634|nucleus;GO:1990904|ribonucleoprotein complex;GO:0071007|U2-type catalytic step 2 spliceosome;GO:0071005|U2-type precatalytic spliceosome;GO:0046540|U4/U6 x U5 tri-snRNP complex	K12852|EFTUD2; 116 kDa U5 small nuclear ribonucleoprotein component	map03040|Spliceosome
evm.model.contig1.76	Protein.evm.model.contig1.76::evm.model.contig1.76	207717-209831[-]	gi|189205045|ref|XM_001938823.1|	300	E:3e-78	Pyrenophora tritici-repentis Pt-1C-BFP nuclear matrix protein, mRNA	RYN23269.1	628	E:0	hypothetical protein AA0115_g8773 [Alternaria tenuissima]	PF11957.8	efThoc1	THO complex subunit 1 transcription elongation factor	ENOG410XQEX	tHO complex	GO:0050832|defense response to fungus;GO:0009873|ethylene-activated signaling pathway;GO:0031047|gene silencing by RNA;GO:0006406|mRNA export from nucleus;GO:0006397|mRNA processing;GO:0010267|production of ta-siRNAs involved in RNA interference;GO:0032784|regulation of DNA-templated transcription, elongation;GO:0008380|RNA splicing	GO:0003723|RNA binding	GO:0005634|nucleus;GO:0000347|THO complex;GO:0000445|THO complex part of transcription export complex	K12878|THOC1; THO complex subunit 1	map03040|Spliceosome;map03013|RNA transport
evm.model.contig2.2074	Protein.evm.model.contig2.2074::evm.model.contig2.2074	5282917-5283283[-]	gi|953416814|ref|XM_014694993.1|	366	E:4e-99	Bipolaris victoriae FI3 hypothetical protein partial mRNA	OAL45958.1	137	E:1e-39	ribosomal protein L14b/L23e [Pyrenochaeta sp. DS3sAY3a]	PF00238.19	Ribosomal_L14	Ribosomal protein L14p/L23e	COG0093	Binds to 23S rRNA. Forms part of two intersubunit bridges in the 70S ribosome (By similarity)	GO:0072717|cellular response to actinomycin D;GO:0071157|negative regulation of cell cycle arrest;GO:0000122|negative regulation of transcription by RNA polymerase II;GO:2000059|negative regulation of ubiquitin-dependent protein catabolic process;GO:0071158|positive regulation of cell cycle arrest;GO:0008284|positive regulation of cell population proliferation;GO:0010628|positive regulation of ge…	GO:0070180|large ribosomal subunit rRNA binding;GO:0003735|structural constituent of ribosome;GO:0001223|transcription coactivator binding;GO:1990948|ubiquitin ligase inhibitor activity;GO:0031625|ubiquitin protein ligase bindingGO:0003735|structural constituent of ribosome	GO:0022625|cytosolic large ribosomal subunit;GO:0005730|nucleolus;GO:0005654|nucleoplasm;GO:0014069|postsynaptic density;GO:0005840|ribosomeGO:0005840|ribosome	K02894|RP-L23e, RPL23; large subunit ribosomal protein L23e	map03010|Ribosome
evm.model.contig2.1790	Protein.evm.model.contig2.1790::evm.model.contig2.1790	4552411-4554364[+]	gi|396485567|ref|XM_003842155.1|	532	E:3e-148	Leptosphaeria maculans JN3 similar to 4-coumarate-CoA ligase (LEMA_P079630.1) mRNA, complete cds	XP_018383400.1	1017	E:0	4-coumarate-CoA ligase-like protein [Alternaria alternata]	PF00501.28	AMP-binding	AMP-binding enzyme	COG0318	Amp-dependent synthetase and ligase	GO:0009695|jasmonic acid biosynthetic process;GO:0031408|oxylipin biosynthetic process	GO:0005524|ATP binding;GO:0004321|fatty-acyl-CoA synthase activity;GO:0016874|ligase activityGO:0003824|catalytic activity	GO:0005777|peroxisome	K01904|4CL; 4-coumarate--CoA ligase [EC:6.2.1.12]	map00130|Ubiquinone and other terpenoid-quinone biosynthesis;map01110|Biosynthesis of secondary metabolites;map01100|Metabolic pathways;map00940|Phenylpropanoid biosynthesis;map00360|Phenylalanine metabolism
evm.model.contig1.1340	Protein.evm.model.contig1.1340::evm.model.contig1.1340	3288002-3288947[+]	gi|636593612|ref|XM_008029954.1|	737	E:0	Setosphaeria turcica Et28A hypothetical protein partial mRNA	OWY57810.1	549	E:0	U-box-like protein [Alternaria alternata]	PF13414.6	TPR_11	TPR repeat	ENOG410ZC2R	STIP1 homology and U-box containing protein 1, E3 ubiquitin protein ligase	GO:0071218|cellular response to misfolded protein;GO:0006281|DNA repair;GO:0030968|endoplasmic reticulum unfolded protein response;GO:0032091|negative regulation of protein binding;GO:0030512|negative regulation of transforming growth factor beta receptor signaling pathway;GO:0090035|positive regulation of chaperone-mediated protein complex assembly;GO:0032436|positive regulation of proteasomal u…	GO:0051087|chaperone binding;GO:0001664|G protein-coupled receptor binding;GO:0030544|Hsp70 protein binding;GO:0051879|Hsp90 protein binding;GO:0019900|kinase binding;GO:0051787|misfolded protein binding;GO:0042803|protein homodimerization activity;GO:0046332|SMAD binding;GO:0030911|TPR domain binding;GO:0031625|ubiquitin protein ligase binding;GO:0004842|ubiquitin-protein transferase activity;GO…	GO:0101031|chaperone complex;GO:0005829|cytosol;GO:0005783|endoplasmic reticulum;GO:0042405|nuclear inclusion body;GO:0005654|nucleoplasm;GO:0000151|ubiquitin ligase complex;GO:0030018|Z disc	K09561|STUB1, CHIP; STIP1 homology and U-box containing protein 1 [EC:2.3.2.27]	map04141|Protein processing in endoplasmic reticulum;map04120|Ubiquitin mediated proteolysis
evm.model.contig2.1397	Protein.evm.model.contig2.1397::evm.model.contig2.1397	3567074-3569606[+]	gi|627819974|ref|XM_007684637.1|	833	E:0	Bipolaris oryzae ATCC 44560 hypothetical protein partial mRNA	RII16232.1	1500	E:0	glycerol-3-phosphate acyltransferase [Alternaria sp. MG1]	PF01553.21	Acyltransferase	Acyltransferase	COG2937	glycerol3phosphate acyltransferase	GO:0016024|CDP-diacylglycerol biosynthetic process	GO:0004366|glycerol-3-phosphate O-acyltransferase activity;GO:0102420|sn-1-glycerol-3-phosphate C16:0-DCA-CoA acyl transferase activityGO:0016746|transferase activity, transferring acyl groups	GO:0005886|plasma membrane	K00631|plsB; glycerol-3-phosphate O-acyltransferase [EC:2.3.1.15]	map01110|Biosynthesis of secondary metabolites;map00561|Glycerolipid metabolism;map01100|Metabolic pathways;map00564|Glycerophospholipid metabolism
evm.model.contig10.264	Protein.evm.model.contig10.264::evm.model.contig10.264	665757-666887[+]	gi|627820902|ref|XM_007685101.1|	416	E:2e-113	Bipolaris oryzae ATCC 44560 hypothetical protein partial mRNA	RYN38767.1	682	E:0	hypothetical protein AA0115_g466 [Alternaria tenuissima]	PF05875.12	Ceramidase	Ceramidase	ENOG4111RPN	alkaline ceramidase	GO:0046514|ceramide catabolic process;GO:0006954|inflammatory response;GO:0042552|myelination;GO:0071602|phytosphingosine biosynthetic process;GO:0008284|positive regulation of cell population proliferation;GO:0043067|regulation of programmed cell death;GO:0046512|sphingosine biosynthetic processGO:0006672|ceramide metabolic process	GO:0005509|calcium ion binding;GO:0102121|ceramidase activity;GO:0071633|dihydroceramidase activity;GO:0017040|N-acylsphingosine amidohydrolase activity;GO:0070774|phytoceramidase activity;GO:0008270|zinc ion bindingGO:0016811|hydrolase activity, acting on carbon-nitrogen (but not peptide) bonds, in linear amides	GO:0005783|endoplasmic reticulum;GO:0030176|integral component of endoplasmic reticulum membrane;GO:0030173|integral component of Golgi membrane;GO:0016021|integral component of membraneGO:0016021|integral component of membrane	K04711|ACER3, YDC1; dihydroceramidase [EC:3.5.1.-]	map00600|Sphingolipid metabolism
evm.model.contig8.339	Protein.evm.model.contig8.339::evm.model.contig8.339	992841-993932[+]	gi|702066578|emb|FO905658.1|	268	E:5e-69	Leptosphaeria biglobosa brassicae b35_scaffold00006 complete sequence	XP_018390896.1	642	E:0	mitochondrial carrier [Alternaria alternata]	PF00153.27	Mito_carr	Mitochondrial carrier protein	ENOG410XQHU	Mitochondrial	GO:0006817|phosphate ion transport	GO:0015297|antiporter activity;GO:0005310|dicarboxylic acid transmembrane transporter activity	GO:0016021|integral component of membrane;GO:0005743|mitochondrial inner membrane	K13577|SLC25A10, DIC; solute carrier family 25 (mitochondrial dicarboxylate transporter), member 10	map04964|Proximal tubule bicarbonate reclamation
evm.model.contig7.475	Protein.evm.model.contig7.475::evm.model.contig7.475	1209045-1209496[+]	gi|636583528|ref|XM_008024912.1|	392	E:9e-107	Setosphaeria turcica Et28A hypothetical protein partial mRNA	OWY43506.1	217	E:8e-71	putative hyperosmotic protein 21 [Alternaria alternata]	PF12861.7	zf-ANAPC11	Anaphase-promoting complex subunit 11 RING-H2 finger	COG5194	protein ubiquitination	GO:0006281|DNA repair;GO:0032436|positive regulation of proteasomal ubiquitin-dependent protein catabolic process;GO:0043161|proteasome-mediated ubiquitin-dependent protein catabolic process;GO:0030163|protein catabolic process;GO:0006513|protein monoubiquitination;GO:0045116|protein neddylation;GO:0016567|protein ubiquitination;GO:0031146|SCF-dependent proteasomal ubiquitin-dependent protein cat…	GO:0097602|cullin family protein binding;GO:0008190|eukaryotic initiation factor 4E binding;GO:0019788|NEDD8 transferase activity;GO:0044877|protein-containing complex binding;GO:0008134|transcription factor binding;GO:0061630|ubiquitin protein ligase activity;GO:0031625|ubiquitin protein ligase binding;GO:0004842|ubiquitin-protein transferase activity;GO:0034450|ubiquitin-ubiquitin ligase activi…	GO:0005680|anaphase-promoting complex;GO:0031462|Cul2-RING ubiquitin ligase complex;GO:0031463|Cul3-RING ubiquitin ligase complex;GO:0080008|Cul4-RING E3 ubiquitin ligase complex;GO:0031464|Cul4A-RING E3 ubiquitin ligase complex;GO:0031465|Cul4B-RING E3 ubiquitin ligase complex;GO:0031466|Cul5-RING ubiquitin ligase complex;GO:0031467|Cul7-RING ubiquitin ligase complex;GO:0031461|cullin-RING ubiqu…	K03868|RBX1, ROC1; RING-box protein 1	map04141|Protein processing in endoplasmic reticulum;map04066|HIF-1 signaling pathway;map03420|Nucleotide excision repair;map05200|Pathways in cancer;map04350|TGF-beta signaling pathway;map04110|Cell cycle;map04111|Cell cycle - yeast;map04114|Oocyte meiosis;map04120|Ubiquitin mediated proteolysis;map04710|Circadian rhythm;map04310|Wnt signaling pathway;map05211|Renal cell carcinoma
evm.model.contig6.514	Protein.evm.model.contig6.514::evm.model.contig6.514	1351551-1352269[-]	gi|597975482|ref|XM_007361929.1|	89.8	E:3e-15	Dichomitus squalens LYAD-421 SS1 hypothetical protein (DICSQDRAFT_132942), mRNA	XP_028501150.1	455	E:5e-161	hypothetical protein AA0111_g11249 [Alternaria arborescens]	PF00160.21	Pro_isomerase	Cyclophilin type peptidyl-prolyl cis-trans isomerase/CLD	COG0652	peptidyl-prolyl cis-trans isomerase activity	GO:0006457|protein foldingGO:0000413|protein peptidyl-prolyl isomerization	GO:0003755|peptidyl-prolyl cis-trans isomerase activityGO:0003755|peptidyl-prolyl cis-trans isomerase activity	GO:0005634|nucleus	K09567|PPIH, CYPH; peptidyl-prolyl isomerase H (cyclophilin H) [EC:5.2.1.8]	map03040|Spliceosome
evm.model.contig1.1954	Protein.evm.model.contig1.1954::evm.model.contig1.1954	4890437-4891930[+]	gi|189201440|ref|XM_001937022.1|	1114	E:0	Pyrenophora tritici-repentis Pt-1C-BFP sulfite oxidase, mitochondrial precursor, mRNA	RII12954.1	917	E:0	hypothetical protein CUC08_Gglean005072 [Alternaria sp. MG1]	PF00174.19	Oxidored_molyb	Oxidoreductase molybdopterin binding domain	COG2041	The exact function is not known. Can catalyze the reduction of a variety of substrates like dimethyl sulfoxide, trimethylamine N-oxide, phenylmethyl sulfoxide and L-methionine sulfoxide. Cannot reduce cyclic N-oxides. Shows no activity as sulfite oxidase (By similarity)	GO:0015994|chlorophyll metabolic process;GO:0042128|nitrate assimilation;GO:0010477|response to sulfur dioxide;GO:0006790|sulfur compound metabolic processGO:0042128|nitrate assimilation;GO:0055114|oxidation-reduction process	GO:0020037|heme binding;GO:0030151|molybdenum ion binding;GO:0043546|molybdopterin cofactor binding;GO:0008482|sulfite oxidase activityGO:0016491|oxidoreductase activity;GO:0030151|molybdenum ion binding	GO:0005829|cytosol;GO:0005739|mitochondrion;GO:0005777|peroxisome	K00387|SUOX; sulfite oxidase [EC:1.8.3.1]	map00920|Sulfur metabolism;map01120|Microbial metabolism in diverse environments
evm.model.contig2.1765	Protein.evm.model.contig2.1765::evm.model.contig2.1765	4501234-4502514[+]	gi|627824152|ref|XM_007686459.1|	691	E:0	Bipolaris oryzae ATCC 44560 hypothetical protein partial mRNA	RYN39005.1	611	E:0	Nuclear protein [Alternaria arborescens]	PF00571.28	CBS	CBS domain	COG0517	Catalyzes the conversion of inosine 5'-phosphate (IMP) to xanthosine 5'-phosphate (XMP), the first committed and rate- limiting step in the de novo synthesis of guanine nucleotides, and therefore plays an important role in the regulation of cell growth (By similarity)	GO:0005975|carbohydrate metabolic process;GO:0007031|peroxisome organization;GO:0045722|positive regulation of gluconeogenesis;GO:0006357|regulation of transcription by RNA polymerase II;GO:0001302|replicative cell aging	GO:0016208|AMP binding;GO:0004679|AMP-activated protein kinase activity;GO:0005524|ATP binding;GO:0042802|identical protein binding;GO:0043539|protein serine/threonine kinase activator activity	GO:0005737|cytoplasm;GO:0005641|nuclear envelope lumen;GO:0031588|nucleotide-activated protein kinase complex;GO:0005886|plasma membrane	K07200|PRKAG; 5'-AMP-activated protein kinase, regulatory gamma subunit	map04152|AMPK signaling pathway;map04068|FoxO signaling pathway;map04922|Glucagon signaling pathway;map05410|Hypertrophic cardiomyopathy (HCM);map04921|Oxytocin signaling pathway;map04710|Circadian rhythm;map04910|Insulin signaling pathway;map04931|Insulin resistance;map04932|Non-alcoholic fatty liver disease (NAFLD);map04920|Adipocytokine signaling pathway
evm.model.contig10.173	Protein.evm.model.contig10.173::evm.model.contig10.173	421604-422164[+]	gi|953434678|ref|XM_014703925.1|	394	E:4e-107	Bipolaris victoriae FI3 hypothetical protein partial mRNA	XP_018387710.1	256	E:4e-85	ribosomal protein L24 [Alternaria alternata]	PF16906.5	Ribosomal_L26	Ribosomal proteins L26 eukaryotic, L24P archaeal	COG0198	One of the proteins that surrounds the polypeptide exit tunnel on the outside of the subunit (By similarity)	GO:0002181|cytoplasmic translation;GO:0042273|ribosomal large subunit biogenesisGO:0006412|translation	GO:0003723|RNA binding;GO:0003735|structural constituent of ribosomeGO:0003735|structural constituent of ribosome	GO:0022625|cytosolic large ribosomal subunit;GO:0022626|cytosolic ribosome;GO:0009536|plastid;GO:0042788|polysomal ribosomeGO:0015934|large ribosomal subunit	K02898|RP-L26e, RPL26; large subunit ribosomal protein L26e	map03010|Ribosome
evm.model.contig9.513	Protein.evm.model.contig9.513::evm.model.contig9.513	1388539-1391428[+]	gi|628064794|ref|XM_007699422.1|	1164	E:0	Cochliobolus sativus ND90Pr hypothetical protein mRNA	RYN77597.1	1125	E:0	NAD(P) transhydrogenase [Alternaria alternata]	PF05222.15	AlaDh_PNT_N	Alanine dehydrogenase/PNT, N-terminal domain	COG1282	The transhydrogenation between NADH and NADP is coupled to respiration and ATP hydrolysis and functions as a proton pump across the membrane (By similarity)	GO:0045454|cell redox homeostasis;GO:0098869|cellular oxidant detoxification;GO:0006740|NADPH regeneration;GO:0043066|negative regulation of apoptotic process;GO:0001933|negative regulation of protein phosphorylation;GO:0055114|oxidation-reduction process;GO:0032364|oxygen homeostasis;GO:1903285|positive regulation of hydrogen peroxide catabolic process;GO:0010918|positive regulation of mitochond…	GO:0051287|NAD binding;GO:0003957|NAD(P)+ transhydrogenase (B-specific) activity;GO:0008746|NAD(P)+ transhydrogenase activity;GO:0050661|NADP binding	GO:0016021|integral component of membrane;GO:0016020|membrane;GO:0005743|mitochondrial inner membrane;GO:0005746|mitochondrial respirasome;GO:0005739|mitochondrion	K00323|NNT; NAD(P) transhydrogenase [EC:1.6.1.2]	map00760|Nicotinate and nicotinamide metabolism;map01100|Metabolic pathways
evm.model.contig8.165	Protein.evm.model.contig8.165::evm.model.contig8.165	476010-477513[+]	gi|169608859|ref|XM_001797797.1|	693	E:0	Phaeosphaeria nodorum SN15 hypothetical protein partial mRNA	XP_018381018.1	611	E:0	hypothetical protein CC77DRAFT_1066078 [Alternaria alternata]	PF00155.21	Aminotran_1_2	Aminotransferase class I and II	COG1448	aminotransferase	GO:0006103|2-oxoglutarate metabolic process;GO:0006532|aspartate biosynthetic process;GO:0006533|aspartate catabolic process;GO:0006531|aspartate metabolic process;GO:0015908|fatty acid transport;GO:0019551|glutamate catabolic process to 2-oxoglutarate;GO:0019550|glutamate catabolic process to aspartate;GO:0006536|glutamate metabolic process;GO:0006107|oxaloacetate metabolic process;GO:0006457|pr…	GO:0016212|kynurenine-oxoglutarate transaminase activity;GO:0004069|L-aspartate:2-oxoglutarate aminotransferase activity;GO:0030170|pyridoxal phosphate bindingGO:0030170|pyridoxal phosphate binding	GO:0005759|mitochondrial matrix;GO:0005739|mitochondrion;GO:0005886|plasma membrane	K14455|GOT2; aspartate aminotransferase, mitochondrial [EC:2.6.1.1]	map01200|Carbon metabolism;map00350|Tyrosine metabolism;map00220|Arginine biosynthesis;map01210|2-Oxocarboxylic acid metabolism;map01230|Biosynthesis of amino acids;map00250|Alanine, aspartate and glutamate metabolism;map00950|Isoquinoline alkaloid biosynthesis;map00400|Phenylalanine, tyrosine and tryptophan biosynthesis;map00330|Arginine and proline metabolism;map00960|Tropane, piperidine and py…
evm.model.contig3.587	Protein.evm.model.contig3.587::evm.model.contig3.587	1530949-1532626[-]	gi|928529285|ref|XM_014227965.1|	883	E:0	Bipolaris maydis ATCC 48331 hypothetical protein partial mRNA	XP_018388371.1	931	E:0	WD40 repeat-like protein [Alternaria alternata]	PF00646.33	F-box	F-box domain	ENOG410XTA8	F-box and WD repeat domain containing 11	GO:0007049|cell cycle;GO:1901223|negative regulation of NIK/NF-kappaB signaling;GO:0045892|negative regulation of transcription, DNA-templated;GO:0042753|positive regulation of circadian rhythm;GO:0045862|positive regulation of proteolysis;GO:0045893|positive regulation of transcription, DNA-templated;GO:0043161|proteasome-mediated ubiquitin-dependent protein catabolic process;GO:0006470|protein …	GO:0046983|protein dimerization activity;GO:0004842|ubiquitin-protein transferase activityGO:0005515|protein binding	GO:0005813|centrosome;GO:0005737|cytoplasm;GO:0005829|cytosol;GO:0005634|nucleus;GO:0019005|SCF ubiquitin ligase complex	K03362|FBXW1_11, BTRC, beta-TRCP; F-box and WD-40 domain protein 1/11	map04390|Hippo signaling pathway;map05131|Shigellosis;map04340|Hedgehog signaling pathway;map04114|Oocyte meiosis;map04120|Ubiquitin mediated proteolysis;map04710|Circadian rhythm;map04310|Wnt signaling pathway
evm.model.contig2.1674	Protein.evm.model.contig2.1674::evm.model.contig2.1674	4270491-4272378[+]	gi|628238634|ref|XM_007719350.1|	769	E:0	Bipolaris zeicola 26-R-13 hypothetical protein partial mRNA	XP_018383284.1	968	E:0	polyamine oxidase [Alternaria alternata]	PF01593.24	Amino_oxidase	Flavin containing amine oxidoreductase	ENOG410XSNC	amine oxidase	GO:0006598|polyamine catabolic process;GO:0046208|spermine catabolic processGO:0055114|oxidation-reduction process	GO:0050660|flavin adenine dinucleotide binding;GO:0052898|N1-acetylspermidine:oxygen oxidoreductase (propane-1,3-diamine-forming) activity;GO:0052893|N1-acetylspermine:oxygen oxidoreductase (propane-1,3-diamine-forming) activity;GO:0052897|N8-acetylspermidine:oxygen oxidoreductase (propane-1,3-diamine-forming) activity;GO:0016491|oxidoreductase activity;GO:0046592|polyamine oxidase activity;GO:00…	GO:0048046|apoplast;GO:0009505|plant-type cell wall	K13366|MPAO, PAO1; polyamine oxidase [EC:1.5.3.14 1.5.3.16 1.5.3.-]	map01100|Metabolic pathways;map00330|Arginine and proline metabolism;map00410|beta-Alanine metabolism
evm.model.contig6.65	Protein.evm.model.contig6.65::evm.model.contig6.65	137204-137984[+]	gi|628086003|ref|XM_007706662.1|	287	E:8e-75	Cochliobolus sativus ND90Pr hypothetical protein mRNA	OAL01974.1	275	E:7e-91	ER lumen protein retaining receptor [Stagonospora sp. SRC1lsM3a]	PF00810.18	ER_lumen_recept	ER lumen protein retaining receptor	COG5196	Required for the retention of luminal endoplasmic reticulum proteins. Determines the specificity of the luminal ER protein retention system. Also required for normal vesicular traffic through the Golgi (By similarity)	GO:0006888|endoplasmic reticulum to Golgi vesicle-mediated transport;GO:0006621|protein retention in ER lumen;GO:0015031|protein transportGO:0006621|protein retention in ER lumen	GO:0005046|KDEL sequence bindingGO:0046923|ER retention sequence binding	GO:0005801|cis-Golgi network;GO:0005783|endoplasmic reticulum;GO:0005789|endoplasmic reticulum membrane;GO:0005794|Golgi apparatus;GO:0016021|integral component of membraneGO:0016021|integral component of membrane	K10949|KDELR; ER lumen protein retaining receptor	map05110|Vibrio cholerae infection
evm.model.contig1.1289	Protein.evm.model.contig1.1289::evm.model.contig1.1289	3157585-3159046[+]	gi|189194150|ref|XM_001933379.1|	773	E:0	Pyrenophora tritici-repentis Pt-1C-BFP aspartate aminotransferase, mRNA	XP_018389272.1	718	E:0	aspartate aminotransferase [Alternaria alternata]	PF00155.21	Aminotran_1_2	Aminotransferase class I and II	COG1448	aminotransferase	GO:0006103|2-oxoglutarate metabolic process;GO:0006532|aspartate biosynthetic process;GO:0006533|aspartate catabolic process;GO:0006531|aspartate metabolic process;GO:0032869|cellular response to insulin stimulus;GO:0055089|fatty acid homeostasis;GO:0019551|glutamate catabolic process to 2-oxoglutarate;GO:0019550|glutamate catabolic process to aspartate;GO:0006536|glutamate metabolic process;GO:0…	GO:0004069|L-aspartate:2-oxoglutarate aminotransferase activity;GO:0047801|L-cysteine:2-oxoglutarate aminotransferase activity;GO:0004609|phosphatidylserine decarboxylase activity;GO:0030170|pyridoxal phosphate bindingGO:0030170|pyridoxal phosphate binding	GO:0005829|cytosol;GO:0005654|nucleoplasm	K14454|GOT1; aspartate aminotransferase, cytoplasmic [EC:2.6.1.1]	map01200|Carbon metabolism;map00350|Tyrosine metabolism;map00220|Arginine biosynthesis;map01210|2-Oxocarboxylic acid metabolism;map01230|Biosynthesis of amino acids;map00250|Alanine, aspartate and glutamate metabolism;map00950|Isoquinoline alkaloid biosynthesis;map00400|Phenylalanine, tyrosine and tryptophan biosynthesis;map00330|Arginine and proline metabolism;map00960|Tropane, piperidine and py…
evm.model.contig4.679	Protein.evm.model.contig4.679::evm.model.contig4.679	1868606-1870451[+]	gi|636594810|ref|XM_008030553.1|	320	E:3e-84	Setosphaeria turcica Et28A hypothetical protein partial mRNA	OWY41740.1	1068	E:0	CAF1-like protein [Alternaria alternata]	PF04857.20	CAF1	CAF1 family ribonuclease	ENOG410XS9D	poly(a)-specific ribonuclease	GO:0000495|box H/ACA snoRNA 3'-end processing;GO:0010587|miRNA catabolic process;GO:0000184|nuclear-transcribed mRNA catabolic process, nonsense-mediated decay;GO:0000289|nuclear-transcribed mRNA poly(A) tail shortening;GO:0071051|polyadenylation-dependent snoRNA 3'-end processing	GO:0000175|3'-5'-exoribonuclease activity;GO:0043169|cation binding;GO:0046872|metal ion binding;GO:0004535|poly(A)-specific ribonuclease activity;GO:0003723|RNA binding	GO:0005737|cytoplasm;GO:0005730|nucleolus	K01148|PARN; poly(A)-specific ribonuclease [EC:3.1.13.4]	map03018|RNA degradation
evm.model.contig4.795	Protein.evm.model.contig4.795::evm.model.contig4.795	2178244-2179489[+]	gi|189201999|ref|XM_001937301.1|	270	E:2e-69	Pyrenophora tritici-repentis Pt-1C-BFP GPI mannosyltransferase 1, mRNA	RYN82053.1	649	E:0	GPI mannosyltransferase 1 [Alternaria alternata]	PF05007.13	Mannosyl_trans	Mannosyltransferase (PIG-M)	ENOG410XRDY	Mannosyltransferase	GO:0071555|cell wall organization;GO:0006506|GPI anchor biosynthetic processGO:0006506|GPI anchor biosynthetic process	GO:0016758|transferase activity, transferring hexosyl groupsGO:0016758|transferase activity, transferring hexosyl groups	GO:0005789|endoplasmic reticulum membrane;GO:0016021|integral component of membraneGO:0016021|integral component of membrane	K05284|PIGM; phosphatidylinositol glycan, class M [EC:2.4.1.-]	map00563|Glycosylphosphatidylinositol(GPI)-anchor biosynthesis;map01100|Metabolic pathways
evm.model.contig2.988	Protein.evm.model.contig2.988::evm.model.contig2.988	2527089-2528682[-]	gi|189210053|ref|XM_001941324.1|	490	E:1e-135	Pyrenophora tritici-repentis Pt-1C-BFP S-adenosylmethionine decarboxylase proenzyme 2, mRNA	RII21238.1	542	E:0	hypothetical protein CUC08_Gglean000400 [Alternaria sp. MG1]	PF01536.16	SAM_decarbox	Adenosylmethionine decarboxylase	ENOG410XRN0	S-adenosylmethionine decarboxylase proenzyme	GO:0050829|defense response to Gram-negative bacterium;GO:0006557|S-adenosylmethioninamine biosynthetic process;GO:0008295|spermidine biosynthetic process;GO:0006597|spermine biosynthetic processGO:0006597|spermine biosynthetic process;GO:0008295|spermidine biosynthetic process	GO:0004014|adenosylmethionine decarboxylase activityGO:0004014|adenosylmethionine decarboxylase activity	GO:0005829|cytosol	K01611|speD, AMD1; S-adenosylmethionine decarboxylase [EC:4.1.1.50]	map01100|Metabolic pathways;map00270|Cysteine and methionine metabolism;map00330|Arginine and proline metabolism
evm.model.contig8.181	Protein.evm.model.contig8.181::evm.model.contig8.181	518465-518924[-]	gi|636580174|ref|XM_008023235.1|	521	E:1e-145	Setosphaeria turcica Et28A hypothetical protein partial mRNA	RII15466.1	280	E:2e-90	hypothetical protein CUC08_Gglean003507 [Alternaria sp. MG1]	PF10415.9	FumaraseC_C	Fumarase C C-terminus	COG0114	fumarate hydratase class II	GO:0006106|fumarate metabolic process;GO:0006108|malate metabolic process;GO:0006099|tricarboxylic acid cycleGO:0006099|tricarboxylic acid cycle	GO:0004333|fumarate hydratase activityGO:0016829|lyase activity	GO:0045239|tricarboxylic acid cycle enzyme complex	K01679|E4.2.1.2B, fumC; fumarate hydratase, class II [EC:4.2.1.2]	map00620|Pyruvate metabolism;map01200|Carbon metabolism;map00020|Citrate cycle (TCA cycle);map00720|Carbon fixation pathways in prokaryotes;map05200|Pathways in cancer;map05211|Renal cell carcinoma;map01110|Biosynthesis of secondary metabolites;map01100|Metabolic pathways;map01120|Microbial metabolism in diverse environments;map01130|Biosynthesis of antibiotics
evm.model.contig3.256	Protein.evm.model.contig3.256::evm.model.contig3.256	696874-697623[-]	gi|928511408|ref|XM_014219032.1|	412	E:2e-112	Bipolaris maydis ATCC 48331 hypothetical protein mRNA	RYO44205.1	342	E:1e-115	hypothetical protein AG0111_g5403 [Alternaria gaisen]	PF14523.6	Syntaxin_2	Syntaxin-like protein	COG5325	SYNtaxin	GO:0000045|autophagosome assembly;GO:0033344|cholesterol efflux;GO:0006886|intracellular protein transport;GO:0050821|protein stabilization;GO:0048278|vesicle docking;GO:0006906|vesicle fusion	GO:0005484|SNAP receptor activity;GO:0000149|SNARE binding	GO:0031901|early endosome membrane;GO:0012505|endomembrane system;GO:0000139|Golgi membrane;GO:0016021|integral component of membrane;GO:0030285|integral component of synaptic vesicle membrane;GO:0045121|membrane raft;GO:0045335|phagocytic vesicle;GO:0000407|phagophore assembly site;GO:0098837|postsynaptic recycling endosome;GO:0055038|recycling endosome membrane;GO:0031201|SNARE complex;GO:00080…	K13813|STX12, STX13; syntaxin 12/13	map04145|Phagosome
evm.model.contig4.191	Protein.evm.model.contig4.191::evm.model.contig4.191	604002-605733[-]	gi|169621150|ref|XM_001803934.1|	209	E:3e-51	Phaeosphaeria nodorum SN15 hypothetical protein partial mRNA	XP_018392000.1	552	E:0	alpha/beta-hydrolase [Alternaria alternata]	PF00561.20	Abhydrolase_1	alpha/beta hydrolase fold	COG1011	Hydrolase	GO:0042632|cholesterol homeostasis;GO:0016311|dephosphorylation;GO:0097176|epoxide metabolic process;GO:0006954|inflammatory response;GO:0043651|linoleic acid metabolic process;GO:0046839|phospholipid dephosphorylation;GO:0045777|positive regulation of blood pressure;GO:0010628|positive regulation of gene expression;GO:0002539|prostaglandin production involved in inflammatory response;GO:0090181|…	GO:0033885|10-hydroxy-9-(phosphonooxy)octadecanoate phosphatase activity;GO:0004301|epoxide hydrolase activity;GO:0042577|lipid phosphatase activity;GO:0000287|magnesium ion binding;GO:0016791|phosphatase activity;GO:0042803|protein homodimerization activity;GO:0015643|toxic substance binding	GO:0005829|cytosol;GO:0005777|peroxisome	K08726|EPHX2; soluble epoxide hydrolase / lipid-phosphate phosphatase [EC:3.3.2.10 3.1.3.76]	map00590|Arachidonic acid metabolism;map01100|Metabolic pathways;map01120|Microbial metabolism in diverse environments;map00625|Chloroalkane and chloroalkene degradation;map04146|Peroxisome
evm.model.contig7.404	Protein.evm.model.contig7.404::evm.model.contig7.404	1021796-1022991[+]	gi|636583330|ref|XM_008024813.1|	427	E:9e-117	Setosphaeria turcica Et28A hypothetical protein mRNA	XP_018385029.1	517	E:0	hypothetical protein CC77DRAFT_937404 [Alternaria alternata]	PF00338.22	Ribosomal_S10	Ribosomal protein S10p/S20e	COG0051	tRNA binding	GO:0006412|translation	GO:0003735|structural constituent of ribosome	GO:0005739|mitochondrion;GO:0005840|ribosome	K02946|RP-S10, MRPS10, rpsJ; small subunit ribosomal protein S10	map03010|Ribosome
evm.model.contig9.613	Protein.evm.model.contig9.613::evm.model.contig9.613	1631434-1632378[+]	gi|702066559|emb|FO905639.1|	577	E:7e-162	Leptosphaeria biglobosa brassicae b35_scaffold00025 complete sequence	XP_018380199.1	547	E:0	periplasmic binding protein-like II [Alternaria alternata]	PF00497.20	SBP_bac_3	Bacterial extracellular solute-binding proteins, family 3	ENOG410XX9W	Dehydratase	GO:0009094|L-phenylalanine biosynthetic process	GO:0047769|arogenate dehydratase activity;GO:0004664|prephenate dehydratase activity	GO:0042597|periplasmic space	K01713|pheC; cyclohexadienyl dehydratase [EC:4.2.1.51 4.2.1.91]	map01230|Biosynthesis of amino acids;map01100|Metabolic pathways;map00400|Phenylalanine, tyrosine and tryptophan biosynthesis;map01110|Biosynthesis of secondary metabolites;map01130|Biosynthesis of antibiotics
evm.model.contig5.293	Protein.evm.model.contig5.293::evm.model.contig5.293	799221-800527[-]	gi|169622110|ref|XM_001804413.1|	1195	E:0	Phaeosphaeria nodorum SN15 hypothetical protein partial mRNA	XP_018381375.1	823	E:0	acyl-CoA dehydrogenase NM domain-like protein [Alternaria alternata]	PF02771.16	Acyl-CoA_dh_N	Acyl-CoA dehydrogenase, N-terminal domain	COG1960	acyl-CoA dehydrogenase	GO:0009083|branched-chain amino acid catabolic process;GO:0006631|fatty acid metabolic processGO:0055114|oxidation-reduction process	GO:0003995|acyl-CoA dehydrogenase activity;GO:0050660|flavin adenine dinucleotide bindingGO:0016627|oxidoreductase activity, acting on the CH-CH group of donors;GO:0050660|flavin adenine dinucleotide binding	GO:0005759|mitochondrial matrix;GO:0005739|mitochondrion	K09478|ACADSB; short/branched chain acyl-CoA dehydrogenase [EC:1.3.99.12]	map00071|Fatty acid degradation;map00280|Valine, leucine and isoleucine degradation;map01212|Fatty acid metabolism;map01100|Metabolic pathways;map01110|Biosynthesis of secondary metabolites
evm.model.contig3.424	Protein.evm.model.contig3.424::evm.model.contig3.424	1096972-1097541[-]	gi|928515885|ref|XM_014221265.1|	329	E:1e-87	Bipolaris maydis ATCC 48331 hypothetical protein partial mRNA	RYN81299.1	137	E:1e-55	Ornithine carbamoyltransferase [Alternaria tenuissima]	PF02729.21	OTCace_N	Aspartate/ornithine carbamoyltransferase, carbamoyl-P binding domain	COG0078	ornithine carbamoyltransferase	GO:0006526|arginine biosynthetic processGO:0006520|cellular amino acid metabolic process	GO:0016597|amino acid binding;GO:0004585|ornithine carbamoyltransferase activityGO:0016743|carboxyl- or carbamoyltransferase activity	GO:0005759|mitochondrial matrix	K00611|OTC, argF, argI; ornithine carbamoyltransferase [EC:2.1.3.3]	map01230|Biosynthesis of amino acids;map01100|Metabolic pathways;map00220|Arginine biosynthesis;map01110|Biosynthesis of secondary metabolites;map01130|Biosynthesis of antibiotics
evm.model.contig9.38	Protein.evm.model.contig9.38::evm.model.contig9.38	98220-99377[+]	gi|995974985|gb|KU170061.1|	1024	E:0	Alternaria alternata strain EV-MIL31 high osmolarity signaling protein Sho1 gene, complete cds	AMJ52176.1	455	E:8e-158	high osmolarity signaling protein Sho1 [Alternaria alternata]	PF00018.28	SH3_1	SH3 domain	ENOG410Y71M	osmosensory signaling pathway	GO:0034605|cellular response to heat;GO:0030010|establishment of cell polarity;GO:0007231|osmosensory signaling pathway;GO:0001402|signal transduction involved in filamentous growth	GO:0005078|MAP-kinase scaffold activity;GO:0005034|osmosensor activityGO:0005515|protein binding	GO:0005935|cellular bud neck;GO:0044697|HICS complex;GO:0016021|integral component of membrane;GO:0043332|mating projection tip;GO:0005886|plasma membrane	K11246|SHO1; SHO1 osmosensor	map04011|MAPK signaling pathway - yeast
evm.model.contig4.526	Protein.evm.model.contig4.526::evm.model.contig4.526	1470374-1472895[-]	gi|953434264|ref|XM_014703718.1|	719	E:0	Bipolaris victoriae FI3 hypothetical protein partial mRNA	RII23971.1	1081	E:0	hypothetical protein CUC08_Gglean012803 [Alternaria sp. MG1]	PF00501.28	AMP-binding	AMP-binding enzyme	COG0318	Amp-dependent synthetase and ligase	GO:0006633|fatty acid biosynthetic process;GO:0006631|fatty acid metabolic process;GO:0035338|long-chain fatty-acyl-CoA biosynthetic process;GO:0090410|malonate catabolic process	GO:0016878|acid-thiol ligase activity;GO:0005524|ATP binding;GO:0090409|malonyl-CoA synthetase activity;GO:0031957|very long-chain fatty acid-CoA ligase activityGO:0003824|catalytic activity	GO:0005759|mitochondrial matrix;GO:0005739|mitochondrion	K18660|ACSF3; malonyl-CoA/methylmalonyl-CoA synthetase [EC:6.2.1.-]	map00280|Valine, leucine and isoleucine degradation
evm.model.contig1.89	Protein.evm.model.contig1.89::evm.model.contig1.89	248518-249442[+]	gi|702073523|emb|FO905897.1|	719	E:0	Leptosphaeria biglobosa Thlaspii ibcn65_scaffold00004 complete sequence	RYO46334.1	562	E:0	hypothetical protein AG0111_g2505 [Alternaria gaisen]	PF00378.20	ECH_1	Enoyl-CoA hydratase/isomerase	COG1024	Enoyl-CoA hydratase	GO:0006635|fatty acid beta-oxidation	GO:0004300|enoyl-CoA hydratase activityGO:0003824|catalytic activity;GO:0003860|3-hydroxyisobutyryl-CoA hydrolase activity	GO:0005759|mitochondrial matrix;GO:0005739|mitochondrion	K07511|ECHS1; enoyl-CoA hydratase [EC:4.2.1.17]	map00930|Caprolactam degradation;map00310|Lysine degradation;map00280|Valine, leucine and isoleucine degradation;map01212|Fatty acid metabolism;map00650|Butanoate metabolism;map00627|Aminobenzoate degradation;map00640|Propanoate metabolism;map00071|Fatty acid degradation;map00410|beta-Alanine metabolism;map00062|Fatty acid elongation;map01110|Biosynthesis of secondary metabolites;map01100|Metabol…
evm.model.contig5.193	Protein.evm.model.contig5.193::evm.model.contig5.193	521937-523807[+]	gi|636578632|ref|XM_008022464.1|	640	E:2e-180	Setosphaeria turcica Et28A hypothetical protein mRNA	XP_018380635.1	1030	E:0	Metallo-dependent hydrolase [Alternaria alternata]	PF00962.22	A_deaminase	Adenosine/AMP deaminase	COG1816	adenosine deaminase	GO:0006154|adenosine catabolic process;GO:0046103|inosine biosynthetic process	GO:0004000|adenosine deaminase activity;GO:0031685|adenosine receptor binding;GO:0008083|growth factor activity;GO:0043394|proteoglycan binding;GO:0008270|zinc ion bindingGO:0019239|deaminase activity	GO:0005615|extracellular space	K19572|CECR1, ADA2; adenosine deaminase CECR1 [EC:3.5.4.4]	map01100|Metabolic pathways;map00230|Purine metabolism
evm.model.contig5.357	Protein.evm.model.contig5.357::evm.model.contig5.357	944369-946018[+]	gi|189203062|ref|XM_001937832.1|	1354	E:0	Pyrenophora tritici-repentis Pt-1C-BFP U4/U6 small nuclear ribonucleoprotein Prp4, mRNA	XP_018381437.1	985	E:0	U4/U6 small nuclear ribonucleo protein Prp4 [Alternaria alternata]	PF08799.11	PRP4	pre-mRNA processing factor 4 (PRP4) like	ENOG410XNP8	U4 u6 small nuclear ribonucleoprotein	GO:0000398|mRNA splicing, via spliceosome	GO:0030621|U4 snRNA binding;GO:0017070|U6 snRNA bindingGO:0005515|protein binding	GO:0015030|Cajal body;GO:0016607|nuclear speck;GO:0097525|spliceosomal snRNP complex;GO:0071005|U2-type precatalytic spliceosome;GO:0071001|U4/U6 snRNP;GO:0046540|U4/U6 x U5 tri-snRNP complex	K12662|PRPF4, PRP4; U4/U6 small nuclear ribonucleoprotein PRP4	map03040|Spliceosome
evm.model.contig10.262	Protein.evm.model.contig10.262::evm.model.contig10.262	663034-664495[+]	gi|169607472|ref|XM_001797104.1|	100	E:3e-18	Phaeosphaeria nodorum SN15 hypothetical protein partial mRNA	XP_018387620.1	748	E:0	hypothetical protein CC77DRAFT_932219 [Alternaria alternata]	PF00364.22	Biotin_lipoyl	Biotin-requiring enzyme	COG0508	Dehydrogenase	GO:0009083|branched-chain amino acid catabolic process	GO:0016407|acetyltransferase activity;GO:0043754|dihydrolipoyllysine-residue (2-methylpropanoyl)transferase activity;GO:0031405|lipoic acid binding;GO:0031625|ubiquitin protein ligase bindingGO:0016746|transferase activity, transferring acyl groups	GO:0005737|cytoplasm;GO:0005947|mitochondrial alpha-ketoglutarate dehydrogenase complex;GO:0005759|mitochondrial matrix;GO:0042645|mitochondrial nucleoid;GO:0005739|mitochondrion	K09699|DBT, bkdB; 2-oxoisovalerate dehydrogenase E2 component (dihydrolipoyl transacylase) [EC:2.3.1.168]	map01110|Biosynthesis of secondary metabolites;map00280|Valine, leucine and isoleucine degradation;map00640|Propanoate metabolism;map01100|Metabolic pathways;map01130|Biosynthesis of antibiotics
evm.model.contig3.576	Protein.evm.model.contig3.576::evm.model.contig3.576	1500163-1502345[+]	gi|628084539|ref|XM_007705930.1|	1085	E:0	Cochliobolus sativus ND90Pr hypothetical protein mRNA	XP_018388358.1	1246	E:0	acyl-coenzyme A oxidase 1 [Alternaria alternata]	PF14749.6	Acyl-CoA_ox_N	Acyl-coenzyme A oxidase N-terminal	COG1960	acyl-CoA dehydrogenase	GO:0033540|fatty acid beta-oxidation using acyl-CoA oxidase;GO:0019395|fatty acid oxidation;GO:0006091|generation of precursor metabolites and energy;GO:0055088|lipid homeostasis;GO:0006629|lipid metabolic process;GO:0006693|prostaglandin metabolic process;GO:0000038|very long-chain fatty acid metabolic processGO:0055114|oxidation-reduction process;GO:0006635|fatty acid beta-oxidation	GO:0003997|acyl-CoA oxidase activity;GO:0071949|FAD binding;GO:0005504|fatty acid binding;GO:0050660|flavin adenine dinucleotide binding;GO:0016401|palmitoyl-CoA oxidase activity;GO:0042803|protein homodimerization activityGO:0016627|oxidoreductase activity, acting on the CH-CH group of donors;GO:0003997|acyl-CoA oxidase activity	GO:0005782|peroxisomal matrix;GO:0005777|peroxisomeGO:0005777|peroxisome	K00232|E1.3.3.6, ACOX1, ACOX3; acyl-CoA oxidase [EC:1.3.3.6]	map01212|Fatty acid metabolism;map04146|Peroxisome;map00071|Fatty acid degradation;map00592|alpha-Linolenic acid metabolism;map03320|PPAR signaling pathway;map01110|Biosynthesis of secondary metabolites;map04024|cAMP signaling pathway;map01100|Metabolic pathways;map01040|Biosynthesis of unsaturated fatty acids
evm.model.contig1.1399	Protein.evm.model.contig1.1399::evm.model.contig1.1399	3426035-3427543[-]	gi|189200908|ref|XM_001936756.1|	1212	E:0	Pyrenophora tritici-repentis Pt-1C-BFP DNAJ domain containing protein, mRNA	RII05791.1	883	E:0	hypothetical protein CUC08_Gglean009006 [Alternaria sp. MG1]	PF13432.6	TPR_16	Tetratricopeptide repeat	COG0484	ATP binding to DnaK triggers the release of the substrate protein, thus completing the reaction cycle. Several rounds of ATP-dependent interactions between DnaJ, DnaK and GrpE are required for fully efficient folding. Also involved, together with DnaK and GrpE, in the DNA replication of plasmids through activation of initiation proteins (By similarity)	GO:0070417|cellular response to cold;GO:1903912|negative regulation of endoplasmic reticulum stress-induced eIF2 alpha phosphorylation;GO:0006469|negative regulation of protein kinase activity;GO:0036494|positive regulation of translation initiation in response to endoplasmic reticulum stress;GO:0034975|protein folding in endoplasmic reticulum;GO:0006986|response to unfolded protein	GO:0051087|chaperone binding;GO:0051787|misfolded protein binding;GO:0019901|protein kinase binding;GO:0004860|protein kinase inhibitor activity;GO:0051082|unfolded protein bindingGO:0005515|protein binding	GO:0005829|cytosol;GO:0005783|endoplasmic reticulum	K09523|DNAJC3; DnaJ homolog subfamily C member 3	map04141|Protein processing in endoplasmic reticulum;map05164|Influenza A
evm.model.contig2.1310	Protein.evm.model.contig2.1310::evm.model.contig2.1310	3358383-3360034[-]	gi|189205794|ref|XM_001939197.1|	608	E:4e-171	Pyrenophora tritici-repentis Pt-1C-BFP hexokinase-2, mRNA	XP_018385637.1	937	E:0	hexokinase-2 [Alternaria alternata]	PF00349.21	Hexokinase_1	Hexokinase	COG5026	hexokinase	GO:0001678|cellular glucose homeostasis;GO:0006096|glycolytic processGO:0005975|carbohydrate metabolic process	GO:0005524|ATP binding;GO:0008865|fructokinase activity;GO:0004340|glucokinase activity;GO:0005536|glucose binding;GO:0019158|mannokinase activityGO:0005524|ATP binding;GO:0016773|phosphotransferase activity, alcohol group as acceptor	GO:0009707|chloroplast outer membrane;GO:0005829|cytosol;GO:0016021|integral component of membrane	K00844|HK; hexokinase [EC:2.7.1.1]	map04066|HIF-1 signaling pathway;map01200|Carbon metabolism;map00010|Glycolysis / Gluconeogenesis;map00500|Starch and sucrose metabolism;map04930|Type II diabetes mellitus;map00524|Butirosin and neomycin biosynthesis;map00521|Streptomycin biosynthesis;map00520|Amino sugar and nucleotide sugar metabolism;map04973|Carbohydrate digestion and absorption;map05230|Central carbon metabolism in cancer;ma…
evm.model.contig2.466	Protein.evm.model.contig2.466::evm.model.contig2.466	1272010-1273973[+]	gi|636593126|ref|XM_008029711.1|	424	E:2e-115	Setosphaeria turcica Et28A hypothetical protein partial mRNA	XP_028502227.1	308	E:2e-100	hypothetical protein AA0111_g10224 [Alternaria arborescens]	PF05743.13	UEV	UEV domain	ENOG410XT2Q	Tumor susceptibility gene 101	GO:0097352|autophagosome maturation;GO:0007050|cell cycle arrest;GO:0051301|cell division;GO:0016197|endosomal transport;GO:0008333|endosome to lysosome transport;GO:1990182|exosomal secretion;GO:0006858|extracellular transport;GO:0075733|intracellular transport of virus;GO:0030216|keratinocyte differentiation;GO:0016236|macroautophagy;GO:0036258|multivesicular body assembly;GO:0008285|negative r…	GO:0048306|calcium-dependent protein binding;GO:0003677|DNA binding;GO:0030374|nuclear receptor transcription coactivator activity;GO:0042803|protein homodimerization activity;GO:0044877|protein-containing complex binding;GO:0003714|transcription corepressor activity;GO:0043130|ubiquitin binding;GO:0031625|ubiquitin protein ligase binding;GO:0046790|virion binding	GO:0005737|cytoplasm;GO:0005829|cytosol;GO:0005769|early endosome;GO:0031901|early endosome membrane;GO:0005768|endosome;GO:0010008|endosome membrane;GO:0000813|ESCRT I complex;GO:0070062|extracellular exosome;GO:0090543|Flemming body;GO:0043657|host cell;GO:0005770|late endosome;GO:0031902|late endosome membrane;GO:0005815|microtubule organizing center;GO:0005771|multivesicular body;GO:0005730|n…	K12183|TSG101, STP22, VPS23; ESCRT-I complex subunit TSG101	map04144|Endocytosis
evm.model.contig1.495	Protein.evm.model.contig1.495::evm.model.contig1.495	1204441-1206824[-]	gi|189194060|ref|XM_001933334.1|	1803	E:0	Pyrenophora tritici-repentis Pt-1C-BFP AP-2 complex subunit beta, mRNA	RII06224.1	1466	E:0	hypothetical protein CUC08_Gglean009439 [Alternaria sp. MG1]	PF01602.20	Adaptin_N	Adaptin N terminal region	COG5096	The coatomer is a cytosolic protein complex that binds to dilysine motifs and reversibly associates with Golgi non- clathrin-coated vesicles, which further mediate biosynthetic protein transport from the ER, via the Golgi up to the trans Golgi network. Coatomer complex is required for budding from Golgi membranes, and is essential for the retrograde Golgi-to-ER transport of dilysine-tagged protei…	GO:0035904|aorta development;GO:0003279|cardiac septum development;GO:0048268|clathrin coat assembly;GO:0072583|clathrin-dependent endocytosis;GO:0060976|coronary vasculature development;GO:0007507|heart development;GO:0006886|intracellular protein transport;GO:1901215|negative regulation of neuron death;GO:0099590|neurotransmitter receptor internalization;GO:0045807|positive regulation of endocy…	GO:0030276|clathrin binding;GO:0044877|protein-containing complex bindingGO:0005515|protein binding	GO:0030122|AP-2 adaptor complex;GO:0030131|clathrin adaptor complex;GO:0098978|glutamatergic synapse;GO:0098794|postsynapseGO:0030117|membrane coat	K11825|AP2B1; AP-2 complex subunit beta-1	map04721|Synaptic vesicle cycle;map05016|Huntington's disease;map04961|Endocrine and other factor-regulated calcium reabsorption;map04144|Endocytosis
evm.model.contig3.1084	Protein.evm.model.contig3.1084::evm.model.contig3.1084	2849957-2850892[-]	gi|189199715|ref|XM_001936160.1|	584	E:4e-164	Pyrenophora tritici-repentis Pt-1C-BFP 3-hydroxyisobutyryl-CoA hydrolase, mitochondrial precursor, mRNA	XP_018388893.1	613	E:0	3-hydroxyisobutyryl-CoA hydrolase mitochondrial precursor [Alternaria alternata]	PF16113.5	ECH_2	Enoyl-CoA hydratase/isomerase	COG1024	Enoyl-CoA hydratase	GO:0006635|fatty acid beta-oxidation;GO:0006574|valine catabolic process	GO:0003860|3-hydroxyisobutyryl-CoA hydrolase activityGO:0003860|3-hydroxyisobutyryl-CoA hydrolase activity;GO:0003824|catalytic activity	GO:0005739|mitochondrion	K05605|HIBCH; 3-hydroxyisobutyryl-CoA hydrolase [EC:3.1.2.4]	map01200|Carbon metabolism;map00280|Valine, leucine and isoleucine degradation;map00640|Propanoate metabolism;map01100|Metabolic pathways;map00410|beta-Alanine metabolism
evm.model.contig2.874	Protein.evm.model.contig2.874::evm.model.contig2.874	2241456-2242601[-]	gi|928526323|ref|XM_014226484.1|	291	E:1e-75	Bipolaris maydis ATCC 48331 hypothetical protein mRNA	XP_018387819.1	571	E:0	SGS-domain-containing protein [Alternaria alternata]	PF13181.6	TPR_8	Tetratricopeptide repeat	COG5091	Suppressor of g2 allele of skp1	GO:0071365|cellular response to auxin stimulus;GO:0006952|defense response;GO:0050832|defense response to fungus;GO:0045087|innate immune response;GO:0050821|protein stabilization;GO:2000072|regulation of defense response to fungus, incompatible interaction;GO:0031647|regulation of protein stability;GO:0006511|ubiquitin-dependent protein catabolic process	GO:0005515|protein binding	GO:0005737|cytoplasm;GO:0005829|cytosol;GO:0005634|nucleus;GO:0019005|SCF ubiquitin ligase complex	K12795|SUGT1, SGT1; suppressor of G2 allele of SKP1	map04626|Plant-pathogen interaction;map04621|NOD-like receptor signaling pathway
evm.model.contig1.1450	Protein.evm.model.contig1.1450::evm.model.contig1.1450	3538071-3538455[-]	gi|928520775|ref|XM_014223710.1|	283	E:6e-74	Bipolaris maydis ATCC 48331 hypothetical protein partial mRNA	RII05768.1	190	E:2e-55	hypothetical protein CUC08_Gglean008983 [Alternaria sp. MG1]	PF12999.7	PRKCSH-like	Glucosidase II beta subunit-like	ENOG410XPE3	protein kinase C substrate	GO:0044267|cellular protein metabolic process;GO:0035556|intracellular signal transduction;GO:0006491|N-glycan processing;GO:0043687|post-translational protein modification;GO:0006457|protein folding	GO:0005509|calcium ion binding;GO:0044325|ion channel binding;GO:0051219|phosphoprotein binding;GO:0005080|protein kinase C binding	GO:0005783|endoplasmic reticulum;GO:0005788|endoplasmic reticulum lumen;GO:0017177|glucosidase II complex;GO:0043231|intracellular membrane-bounded organelle	K08288|PRKCSH; protein kinase C substrate 80K-H	map04141|Protein processing in endoplasmic reticulum
evm.model.contig6.691	Protein.evm.model.contig6.691::evm.model.contig6.691	1825559-1827705[+]	gi|628074242|ref|XM_007703585.1|	597	E:1e-167	Cochliobolus sativus ND90Pr hypothetical protein mRNA	OWY49297.1	982	E:0	uncharacterized protein AALT_g10078 [Alternaria alternata]	PF01735.18	PLA2_B	Lysophospholipase catalytic domain	ENOG410XR72	phospholipase A2 group	GO:0019369|arachidonic acid metabolic process;GO:0019722|calcium-mediated signaling;GO:0046475|glycerophospholipid catabolic process;GO:0006954|inflammatory response;GO:0036498|IRE1-mediated unfolded protein response;GO:0007567|parturition;GO:0006654|phosphatidic acid biosynthetic process;GO:0036151|phosphatidylcholine acyl-chain remodeling;GO:0036152|phosphatidylethanolamine acyl-chain remodelin…	GO:0005509|calcium ion binding;GO:0047498|calcium-dependent phospholipase A2 activity;GO:0005544|calcium-dependent phospholipid binding;GO:0004622|lysophospholipase activity;GO:0004623|phospholipase A2 activity;GO:0102567|phospholipase A2 activity (consuming 1,2-dipalmitoylphosphatidylcholine);GO:0102568|phospholipase A2 activity consuming 1,2-dioleoylphosphatidylethanolamine)GO:0004620|phospholi…	GO:0005737|cytoplasm;GO:0005829|cytosol;GO:0031901|early endosome membrane;GO:0005576|extracellular region;GO:0005743|mitochondrial inner membrane	K16342|PLA2G4, CPLA2; cytosolic phospholipase A2 [EC:3.1.1.4]	map04010|MAPK signaling pathway;map04014|Ras signaling pathway;map04270|Vascular smooth muscle contraction;map01100|Metabolic pathways;map00565|Ether lipid metabolism;map00564|Glycerophospholipid metabolism;map04730|Long-term depression;map04611|Platelet activation;map04921|Oxytocin signaling pathway;map04750|Inflammatory mediator regulation of TRP channels;map04370|VEGF signaling pathway;map0059…
evm.model.contig1.248	Protein.evm.model.contig1.248::evm.model.contig1.248	625887-626695[-]	gi|189205013|ref|XM_001938807.1|	385	E:3e-104	Pyrenophora tritici-repentis Pt-1C-BFP 60S ribosomal protein L13, partial mRNA	RYN41996.1	232	E:6e-74	hypothetical protein AA0112_g1893 [Alternaria arborescens]	PF01294.18	Ribosomal_L13e	Ribosomal protein L13e	COG4352	cytoplasmic translation	GO:0006412|translationGO:0006412|translation	GO:0003735|structural constituent of ribosomeGO:0003735|structural constituent of ribosome	GO:0022625|cytosolic large ribosomal subunitGO:0005622|intracellular;GO:0005840|ribosome	K02873|RP-L13e, RPL13; large subunit ribosomal protein L13e	map03010|Ribosome
evm.model.contig2.697	Protein.evm.model.contig2.697::evm.model.contig2.697	1784050-1784610[+]	gi|627836952|ref|XM_007690498.1|	377	E:4e-102	Bipolaris oryzae ATCC 44560 hypothetical protein partial mRNA	OWY46182.1	349	E:3e-120	thymidylate kinase [Alternaria alternata]	PF02223.17	Thymidylate_kin	Thymidylate kinase	COG0125	Phosphorylation of dTMP to form dTDP in both de novo and salvage pathways of dTTP synthesis (By similarity)	GO:0006233|dTDP biosynthetic process;GO:0006235|dTTP biosynthetic process;GO:0006227|dUDP biosynthetic process;GO:0009793|embryo development ending in seed dormancy	GO:0005524|ATP binding;GO:0004550|nucleoside diphosphate kinase activity;GO:0004798|thymidylate kinase activity;GO:0009041|uridylate kinase activity	GO:0005737|cytoplasm;GO:0005829|cytosol;GO:0005739|mitochondrion;GO:0005654|nucleoplasm;GO:0005634|nucleus	K00943|tmk, DTYMK; dTMP kinase [EC:2.7.4.9]	map01100|Metabolic pathways;map00240|Pyrimidine metabolism;map00670|One carbon pool by folate
evm.model.contig10.85	Protein.evm.model.contig10.85::evm.model.contig10.85	212418-213305[+]	gi|702066549|emb|FO905629.1|	481	E:6e-133	Leptosphaeria biglobosa brassicae b35_scaffold00035 complete sequence	OWY48307.1	289	E:3e-106	TRAF-type zinc finger protein [Alternaria alternata]	PF13920.6	zf-C3HC4_3	Zinc finger, C3HC4 type (RING finger)	ENOG410XNN7	RING finger protein 41	GO:0006914|autophagy;GO:0097191|extrinsic apoptotic signaling pathway;GO:0030336|negative regulation of cell migration;GO:0008285|negative regulation of cell population proliferation;GO:1901525|negative regulation of mitophagy;GO:0051091|positive regulation of DNA-binding transcription factor activity;GO:0045732|positive regulation of protein catabolic process;GO:2000379|positive regulation of re…	GO:0005128|erythropoietin receptor binding;GO:0005135|interleukin-3 receptor binding;GO:0019904|protein domain specific binding;GO:0017160|Ral GTPase binding;GO:0030971|receptor tyrosine kinase binding;GO:0061630|ubiquitin protein ligase activity;GO:0004842|ubiquitin-protein transferase activity;GO:0008270|zinc ion bindingGO:0046872|metal ion binding	GO:0071782|endoplasmic reticulum tubular network;GO:0048471|perinuclear region of cytoplasm	K11981|RNF41, NRDP1; E3 ubiquitin-protein ligase NRDP1 [EC:2.3.2.27]	map04144|Endocytosis
evm.model.contig10.389	Protein.evm.model.contig10.389::evm.model.contig10.389	982538-984433[+]	gi|928527725|ref|XM_014227185.1|	774	E:0	Bipolaris maydis ATCC 48331 glycoside hydrolase family 47 protein mRNA	XP_018387489.1	1240	E:0	seven-hairpin glycosidase [Alternaria alternata]	PF01532.20	Glyco_hydro_47	Glycosyl hydrolase family 47	ENOG410XP04	Mannosidase alpha class	GO:0006491|N-glycan processing;GO:0006486|protein glycosylation	GO:0004559|alpha-mannosidase activity;GO:0005509|calcium ion binding;GO:0004571|mannosyl-oligosaccharide 1,2-alpha-mannosidase activityGO:0004571|mannosyl-oligosaccharide 1,2-alpha-mannosidase activity;GO:0005509|calcium ion binding	GO:0005783|endoplasmic reticulum;GO:0005768|endosome;GO:0005794|Golgi apparatus;GO:0000139|Golgi membrane;GO:0016021|integral component of membrane;GO:0005802|trans-Golgi networkGO:0016020|membrane	K01230|MAN1; mannosyl-oligosaccharide alpha-1,2-mannosidase [EC:3.2.1.113]	map04141|Protein processing in endoplasmic reticulum;map00513|Various types of N-glycan biosynthesis;map01100|Metabolic pathways;map00510|N-Glycan biosynthesis
evm.model.contig1.2262	Protein.evm.model.contig1.2262::evm.model.contig1.2262	5759834-5764198[+]	gi|396498365|ref|XM_003845155.1|	470	E:3e-129	Leptosphaeria maculans JN3 hypothetical protein (LEMA_P005110.1) mRNA, complete cds	RYN91919.1	634	E:0	hypothetical protein AA0120_g5319 [Alternaria tenuissima]	PF01263.20	Aldose_epim	Aldose 1-epimerase	COG2017	converts alpha-aldose to the beta-anomer. It is active on D-glucose, L-arabinose, D-xylose, D-galactose, maltose and lactose (By similarity)	GO:0019318|hexose metabolic processGO:0005975|carbohydrate metabolic process	GO:0004034|aldose 1-epimerase activity;GO:0030246|carbohydrate bindingGO:0016853|isomerase activity	GO:0005576|extracellular region	K01785|galM, GALM; aldose 1-epimerase [EC:5.1.3.3]	map00010|Glycolysis / Gluconeogenesis;map01110|Biosynthesis of secondary metabolites;map01100|Metabolic pathways;map01130|Biosynthesis of antibiotics;map01120|Microbial metabolism in diverse environments;map00052|Galactose metabolism;map00520|Amino sugar and nucleotide sugar metabolism
evm.model.contig3.582	Protein.evm.model.contig3.582::evm.model.contig3.582	1514525-1518222[-]	gi|636581294|ref|XM_008023795.1|	894	E:0	Setosphaeria turcica Et28A hypothetical protein mRNA	EYE94789.1	872	E:0	aconitate hydratase [Aspergillus ruber CBS 135680]	PF00330.20	Aconitase	Aconitase family (aconitate hydratase)	COG1048	aconitate hydratase	GO:0006099|tricarboxylic acid cycle	GO:0051539|4 iron, 4 sulfur cluster binding;GO:0003994|aconitate hydratase activity;GO:0046872|metal ion bindingGO:0003824|catalytic activity;GO:0051536|iron-sulfur cluster binding	GO:0005829|cytosol;GO:0031012|extracellular matrix;GO:0005739|mitochondrion	K01681|ACO, acnA; aconitate hydratase [EC:4.2.1.3]	map01200|Carbon metabolism;map00630|Glyoxylate and dicarboxylate metabolism;map00020|Citrate cycle (TCA cycle);map01210|2-Oxocarboxylic acid metabolism;map01230|Biosynthesis of amino acids;map00720|Carbon fixation pathways in prokaryotes;map01110|Biosynthesis of secondary metabolites;map01100|Metabolic pathways;map01120|Microbial metabolism in diverse environments;map01130|Biosynthesis of antibio…
evm.model.contig9.114	Protein.evm.model.contig9.114::evm.model.contig9.114	293259-295148[-]	gi|628222235|ref|XM_007716843.1|	1044	E:0	Bipolaris zeicola 26-R-13 hypothetical protein partial mRNA	RII19108.1	968	E:0	hypothetical protein CUC08_Gglean001771 [Alternaria sp. MG1]	PF00390.19	malic	Malic enzyme, N-terminal domain	COG0281	malic enzyme	GO:0006108|malate metabolic process;GO:0006090|pyruvate metabolic processGO:0055114|oxidation-reduction process	GO:0004471|malate dehydrogenase (decarboxylating) (NAD+) activity;GO:0004473|malate dehydrogenase (decarboxylating) (NADP+) activity;GO:0004470|malic enzyme activity;GO:0046872|metal ion binding;GO:0051287|NAD binding;GO:0008948|oxaloacetate decarboxylase activityGO:0004471|malate dehydrogenase (decarboxylating) (NAD+) activity;GO:0051287|NAD binding	GO:0005739|mitochondrion	K00029|E1.1.1.40, maeB; malate dehydrogenase (oxaloacetate-decarboxylating)(NADP+) [EC:1.1.1.40]	map00620|Pyruvate metabolism;map01120|Microbial metabolism in diverse environments;map01100|Metabolic pathways;map00710|Carbon fixation in photosynthetic organisms;map01200|Carbon metabolism
evm.model.contig1.184	Protein.evm.model.contig1.184::evm.model.contig1.184	480096-483336[+]	gi|636596672|ref|XM_008031484.1|	957	E:0	Setosphaeria turcica Et28A hypothetical protein mRNA	OWY47447.1	1647	E:0	Adaptor protein complex AP-2 alpha subunit [Alternaria alternata]	PF01602.20	Adaptin_N	Adaptin N terminal region	ENOG410XNQE	Adaptor-related protein complex 2, alpha	GO:0072583|clathrin-dependent endocytosis;GO:0006886|intracellular protein transport;GO:0015031|protein transport;GO:0048488|synaptic vesicle endocytosisGO:0006886|intracellular protein transport;GO:0016192|vesicle-mediated transport	GO:0035615|clathrin adaptor activity	GO:0030122|AP-2 adaptor complex;GO:0005905|clathrin-coated pit;GO:0005886|plasma membrane;GO:0098793|presynapseGO:0030117|membrane coat;GO:0030131|clathrin adaptor complex	K11824|AP2A; AP-2 complex subunit alpha	map04721|Synaptic vesicle cycle;map05016|Huntington's disease;map04961|Endocrine and other factor-regulated calcium reabsorption;map04144|Endocytosis
evm.model.contig4.148	Protein.evm.model.contig4.148::evm.model.contig4.148	491679-492703[+]	gi|702073671|emb|FO906018.1|	377	E:8e-102	Leptosphaeria maculans lepidii ibcn84_scaffold00006 complete sequence	RII23116.1	417	E:1e-142	hypothetical protein CUC08_Gglean011938 [Alternaria sp. MG1]	PF00173.28	Cyt-b5	Cytochrome b5-like Heme/Steroid binding domain	COG0543	cytochrome-b5 reductase activity, acting on NAD(P)H	GO:0006091|generation of precursor metabolites and energy;GO:0055114|oxidation-reduction process;GO:0006801|superoxide metabolic process	GO:0004128|cytochrome-b5 reductase activity, acting on NAD(P)H;GO:0020037|heme binding;GO:0046872|metal ion binding	GO:0005783|endoplasmic reticulum	K00326|E1.6.2.2; cytochrome-b5 reductase [EC:1.6.2.2]	map00520|Amino sugar and nucleotide sugar metabolism
evm.model.contig7.652	Protein.evm.model.contig7.652::evm.model.contig7.652	1665817-1668021[+]	gi|636599638|ref|XM_008032967.1|	715	E:0	Setosphaeria turcica Et28A hypothetical protein partial mRNA	OWY48046.1	1276	E:0	Pkinase-like protein [Alternaria alternata]	PF00498.26	FHA	FHA domain	ENOG410YA63	doublecortin-like kinase	GO:0006974|cellular response to DNA damage stimulus;GO:0000077|DNA damage checkpoint;GO:0044773|mitotic DNA damage checkpoint;GO:0042770|signal transduction in response to DNA damageGO:0006468|protein phosphorylation	GO:0005524|ATP binding;GO:0004674|protein serine/threonine kinase activityGO:0005515|protein binding;GO:0004672|protein kinase activity;GO:0005524|ATP binding	GO:0005737|cytoplasm;GO:0005634|nucleus	K06641|CHK2; serine/threonine-protein kinase Chk2 [EC:2.7.11.1]	map05166|HTLV-I infection;map04111|Cell cycle - yeast;map04110|Cell cycle;map04115|p53 signaling pathway
evm.model.contig3.1214	Protein.evm.model.contig3.1214::evm.model.contig3.1214	3251737-3252729[-]	gi|928514937|ref|XM_014220791.1|	833	E:0	Bipolaris maydis ATCC 48331 hypothetical protein partial mRNA	XP_018379390.1	488	E:5e-173	Triosephosphate isomerase [Alternaria alternata]	PF00121.18	TIM	Triosephosphate isomerase	COG0149	triosephosphate isomerase	GO:0044650|adhesion of symbiont to host cell;GO:0061621|canonical glycolysis;GO:0006094|gluconeogenesis;GO:0006096|glycolytic process;GO:2000535|regulation of entry of bacterium into host cell	GO:1990430|extracellular matrix protein binding;GO:0004807|triose-phosphate isomerase activityGO:0004807|triose-phosphate isomerase activity	GO:0005618|cell wall;GO:0005737|cytoplasm	K01803|TPI, tpiA; triosephosphate isomerase (TIM) [EC:5.3.1.1]	map00562|Inositol phosphate metabolism;map01200|Carbon metabolism;map01230|Biosynthesis of amino acids;map00010|Glycolysis / Gluconeogenesis;map00710|Carbon fixation in photosynthetic organisms;map01110|Biosynthesis of secondary metabolites;map00051|Fructose and mannose metabolism;map01100|Metabolic pathways;map01120|Microbial metabolism in diverse environments;map01130|Biosynthesis of antibiotics
evm.model.contig1.1740	Protein.evm.model.contig1.1740::evm.model.contig1.1740	4366303-4369267[-]	gi|189208339|ref|XM_001940468.1|	1345	E:0	Pyrenophora tritici-repentis Pt-1C-BFP endoribonuclease YSH1, mRNA	OWY42422.1	1516	E:0	endoribonuclease YSH1 [Alternaria alternata]	PF00753.27	Lactamase_B	Metallo-beta-lactamase superfamily	COG1236	cleavage and polyadenylation	GO:0006397|mRNA processing	GO:0004519|endonuclease activity;GO:0046872|metal ion binding	GO:0005634|nucleus	K14403|CPSF3, YSH1; cleavage and polyadenylation specificity factor subunit 3 [EC:3.1.27.-]	map03015|mRNA surveillance pathway
evm.model.contig2.1590	Protein.evm.model.contig2.1590::evm.model.contig2.1590	4043078-4044649[+]	gi|636587038|ref|XM_008026667.1|	1157	E:0	Setosphaeria turcica Et28A hypothetical protein mRNA	XP_018383194.1	779	E:0	Metallo-dependent phosphatase [Alternaria alternata]	PF00149.28	Metallophos	Calcineurin-like phosphoesterase	COG0639	serine threonine-protein phosphatase	GO:0048264|determination of ventral identity;GO:0009953|dorsal/ventral pattern formation;GO:0030513|positive regulation of BMP signaling pathway	GO:0046872|metal ion binding;GO:0004721|phosphoprotein phosphatase activityGO:0016787|hydrolase activity	GO:0005737|cytoplasm;GO:0005815|microtubule organizing center	K15423|PPP4C; serine/threonine-protein phosphatase 4 catalytic subunit [EC:3.1.3.16]	map04922|Glucagon signaling pathway
evm.model.contig5.94	Protein.evm.model.contig5.94::evm.model.contig5.94	275302-275538[-]	gi|928518349|ref|XM_014222497.1|	211	E:1e-52	Bipolaris maydis ATCC 48331 hypothetical protein partial mRNA	RII14134.1	128	E:5e-33	hypothetical protein CUC08_Gglean004275 [Alternaria sp. MG1]	PF04560.20	RNA_pol_Rpb2_7	RNA polymerase Rpb2, domain 7	COG0085	DNA-dependent RNA polymerase catalyzes the transcription of DNA into RNA using the four ribonucleoside triphosphates as substrates (By similarity)	GO:0031048|chromatin silencing by small RNA;GO:0006366|transcription by RNA polymerase IIGO:0006351|transcription, DNA-templated	GO:0003677|DNA binding;GO:0003899|DNA-directed 5'-3' RNA polymerase activity;GO:0046872|metal ion binding;GO:0032549|ribonucleoside binding;GO:0003723|RNA bindingGO:0003677|DNA binding;GO:0003899|DNA-directed 5'-3' RNA polymerase activity	GO:0031618|nuclear pericentric heterochromatin;GO:0005665|RNA polymerase II, core complex	K03010|RPB2, POLR2B; DNA-directed RNA polymerase II subunit RPB2 [EC:2.7.7.6]	map03020|RNA polymerase;map00240|Pyrimidine metabolism;map05169|Epstein-Barr virus infection;map01100|Metabolic pathways;map05016|Huntington's disease;map00230|Purine metabolism
evm.model.contig5.959	Protein.evm.model.contig5.959::evm.model.contig5.959	2509685-2510295[-]	gi|627827911|ref|XM_007687644.1|	353	E:7e-95	Bipolaris oryzae ATCC 44560 hypothetical protein partial mRNA	RII07069.1	231	E:6e-75	hypothetical protein CUC08_Gglean008037 [Alternaria sp. MG1]	PF00179.26	UQ_con	Ubiquitin-conjugating enzyme	COG5078	ubiquitin-conjugating enzyme	GO:0043161|proteasome-mediated ubiquitin-dependent protein catabolic process	GO:0005524|ATP binding;GO:0061631|ubiquitin conjugating enzyme activity	GO:0005634|nucleus	K10688|UBE2W, UBC16; ubiquitin-conjugating enzyme E2 W [EC:2.3.2.25]	map04120|Ubiquitin mediated proteolysis
evm.model.contig5.244	Protein.evm.model.contig5.244::evm.model.contig5.244	690561-692209[+]	gi|628073016|ref|XM_007702972.1|	1179	E:0	Cochliobolus sativus ND90Pr hypothetical protein mRNA	XP_018381324.1	882	E:0	hypothetical protein CC77DRAFT_1034443 [Alternaria alternata]	PF01144.23	CoA_trans	Coenzyme A transferase	COG1788	Key enzyme for ketone body catabolism. Transfers the CoA moiety from succinate to acetoacetate. Formation of the enzyme-CoA intermediate proceeds via an unstable anhydride species formed between the carboxylate groups of the enzyme and substrate (By similarity)	GO:0060612|adipose tissue development;GO:0007420|brain development;GO:0046950|cellular ketone body metabolic process;GO:0007507|heart development;GO:0046952|ketone body catabolic process;GO:0042182|ketone catabolic process;GO:0035774|positive regulation of insulin secretion involved in cellular response to glucose stimulus;GO:0014823|response to activity;GO:0045471|response to ethanol;GO:0009725|…	GO:0008260|3-oxoacid CoA-transferase activity;GO:0042803|protein homodimerization activityGO:0008410|CoA-transferase activity	GO:0005759|mitochondrial matrix;GO:0005739|mitochondrion;GO:0005654|nucleoplasm	K01027|OXCT; 3-oxoacid CoA-transferase [EC:2.8.3.5]	map00280|Valine, leucine and isoleucine degradation;map00650|Butanoate metabolism;map00072|Synthesis and degradation of ketone bodies
evm.model.contig2.1102	Protein.evm.model.contig2.1102::evm.model.contig2.1102	2822971-2823506[-]	gi|702066537|emb|FO905617.1|	174	E:6e-41	Leptosphaeria biglobosa brassicae b35_scaffold00047 complete sequence	XP_018385865.1	288	E:4e-97	RNA-binding domain-containing protein [Alternaria alternata]	PF00076.22	RRM_1	RNA recognition motif. (a.k.a. RRM, RBD, or RNP domain)	ENOG4111IHM	RNA binding motif protein 8A	GO:0000398|mRNA splicing, via spliceosome;GO:0051028|mRNA transport;GO:0000184|nuclear-transcribed mRNA catabolic process, nonsense-mediated decay;GO:0000381|regulation of alternative mRNA splicing, via spliceosome;GO:0006417|regulation of translation	GO:0003729|mRNA bindingGO:0003676|nucleic acid binding	GO:0005737|cytoplasm;GO:0035145|exon-exon junction complex;GO:0016607|nuclear speck;GO:0005634|nucleus;GO:0071006|U2-type catalytic step 1 spliceosome	K12876|RBM8A, Y14; RNA-binding protein 8A	map03015|mRNA surveillance pathway;map03040|Spliceosome;map03013|RNA transport
evm.model.contig1.548	Protein.evm.model.contig1.548::evm.model.contig1.548	1359233-1360316[+]	gi|189210300|ref|XM_001941447.1|	305	E:4e-80	Pyrenophora tritici-repentis Pt-1C-BFP 6-phosphogluconate dehydrogenase 2, mRNA	XP_028511818.1	558	E:0	hypothetical protein AA0111_g417 [Alternaria arborescens]	PF03446.15	NAD_binding_2	NAD binding domain of 6-phosphogluconate dehydrogenase	COG2084	Dehydrogenase	GO:0006979|response to oxidative stress	GO:0003858|3-hydroxybutyrate dehydrogenase activity;GO:0030267|glyoxylate reductase (NADP) activity;GO:0051287|NAD binding;GO:0050661|NADP bindingGO:0050661|NADP binding	GO:0005829|cytosol	K18121|GLYR; glyoxylate/succinic semialdehyde reductase [EC:1.1.1.79 1.1.1.-]	map01200|Carbon metabolism;map01100|Metabolic pathways;map00630|Glyoxylate and dicarboxylate metabolism;map01120|Microbial metabolism in diverse environments;map00650|Butanoate metabolism
evm.model.contig4.222	Protein.evm.model.contig4.222::evm.model.contig4.222	671550-673611[-]	gi|928509370|ref|XM_014218014.1|	374	E:2e-100	Bipolaris maydis ATCC 48331 glycoside hydrolase family 47 protein mRNA	RYO55766.1	1042	E:0	hypothetical protein AA0113_g8664 [Alternaria arborescens]	PF01532.20	Glyco_hydro_47	Glycosyl hydrolase family 47	ENOG410XP04	Mannosidase alpha class	GO:1904382|mannose trimming involved in glycoprotein ERAD pathway;GO:0006491|N-glycan processing;GO:0006486|protein glycosylation;GO:0036509|trimming of terminal mannose on B branch;GO:0030433|ubiquitin-dependent ERAD pathway	GO:0005509|calcium ion binding;GO:0004571|mannosyl-oligosaccharide 1,2-alpha-mannosidase activityGO:0004571|mannosyl-oligosaccharide 1,2-alpha-mannosidase activity;GO:0005509|calcium ion binding	GO:0005783|endoplasmic reticulum;GO:0005789|endoplasmic reticulum membrane;GO:0044322|endoplasmic reticulum quality control compartment;GO:0016021|integral component of membrane;GO:0016020|membraneGO:0016020|membrane	K01230|MAN1; mannosyl-oligosaccharide alpha-1,2-mannosidase [EC:3.2.1.113]	map04141|Protein processing in endoplasmic reticulum;map00513|Various types of N-glycan biosynthesis;map01100|Metabolic pathways;map00510|N-Glycan biosynthesis
evm.model.contig3.437	Protein.evm.model.contig3.437::evm.model.contig3.437	1137919-1138571[+]	gi|189196429|ref|XM_001934518.1|	529	E:8e-148	Pyrenophora tritici-repentis Pt-1C-BFP 60S ribosomal protein L31, partial mRNA	PZD14077.1	202	E:1e-64	4HBT domain containing protein, partial [Pyrenophora tritici-repentis]	PF01198.19	Ribosomal_L31e	Ribosomal protein L31e	COG2097	(ribosomal) protein	GO:0006412|translationGO:0006412|translation	GO:0003735|structural constituent of ribosomeGO:0003735|structural constituent of ribosome	GO:0005840|ribosomeGO:0005840|ribosome	K02910|RP-L31e, RPL31; large subunit ribosomal protein L31e	map03010|Ribosome
evm.model.contig2.580	Protein.evm.model.contig2.580::evm.model.contig2.580	1537261-1539305[+]	gi|169609840|ref|XM_001798287.1|	878	E:0	Phaeosphaeria nodorum SN15 hypothetical protein partial mRNA	XP_018388110.1	663	E:0	alcohol oxidase [Alternaria alternata]	PF13450.6	NAD_binding_8	NAD(P)-binding Rossmann-like domain	COG2303	oxidoreductase	GO:0019285|glycine betaine biosynthetic process from cholineGO:0055114|oxidation-reduction process	GO:0008812|choline dehydrogenase activity;GO:0050660|flavin adenine dinucleotide bindingGO:0016614|oxidoreductase activity, acting on CH-OH group of donors;GO:0050660|flavin adenine dinucleotide binding	GO:0005743|mitochondrial inner membrane;GO:0005739|mitochondrion	K00108|betA, CHDH; choline dehydrogenase [EC:1.1.99.1]	map00260|Glycine, serine and threonine metabolism;map01100|Metabolic pathways
evm.model.contig3.1008	Protein.evm.model.contig3.1008::evm.model.contig3.1008	2644211-2644939[+]	gi|189199875|ref|XM_001936240.1|	529	E:1e-147	Pyrenophora tritici-repentis Pt-1C-BFP glycine cleavage system H protein, mitochondrial precursor, mRNA	OWY52929.1	273	E:2e-90	glycine cleavage system H protein, mitochondrial precursor [Alternaria alternata]	PF01597.19	GCV_H	Glycine cleavage H-protein	COG0509	The glycine cleavage system catalyzes the degradation of glycine. The H protein shuttles the methylamine group of glycine from the P protein to the T protein (By similarity)	GO:0019464|glycine decarboxylation via glycine cleavage system	GO:0005524|ATP binding	GO:0005960|glycine cleavage complex;GO:0005739|mitochondrion	K02437|gcvH, GCSH; glycine cleavage system H protein	map00260|Glycine, serine and threonine metabolism;map01100|Metabolic pathways;map00630|Glyoxylate and dicarboxylate metabolism;map01110|Biosynthesis of secondary metabolites;map01130|Biosynthesis of antibiotics
evm.model.contig2.1324	Protein.evm.model.contig2.1324::evm.model.contig2.1324	3388766-3389201[-]	gi|702066576|emb|FO905656.1|	243	E:1e-61	Leptosphaeria biglobosa brassicae b35_scaffold00008 complete sequence	XP_018385625.1	114	E:2e-31	ubiquitin-like protein [Alternaria alternata]	PF11976.8	Rad60-SLD	Ubiquitin-2 like Rad60 SUMO-like	COG5227	smt3 suppressor of mif two 3 homolog	GO:0010286|heat acclimation;GO:0043433|negative regulation of DNA-binding transcription factor activity;GO:0016925|protein sumoylation;GO:0009408|response to heat	GO:0031386|protein tag;GO:0044389|ubiquitin-like protein ligase binding	GO:0005737|cytoplasm;GO:0005829|cytosol;GO:0005634|nucleus	K12160|SUMO, SMT3; small ubiquitin-related modifier	map03013|RNA transport
evm.model.contig7.415	Protein.evm.model.contig7.415::evm.model.contig7.415	1049002-1051584[+]	gi|189189945|ref|XM_001931277.1|	1037	E:0	Pyrenophora tritici-repentis Pt-1C-BFP serine/threonine-protein kinase shk2, mRNA	RII10162.1	617	E:0	hypothetical protein CUC08_Gglean006152 [Alternaria sp. MG1]	PF00786.28	PBD	P21-Rho-binding domain	ENOG410XP4K	p21 protein (Cdc42 Rac)-activated kinase	GO:0007121|bipolar cellular bud site selection;GO:0007118|budding cell apical bud growth;GO:0034605|cellular response to heat;GO:0001403|invasive growth in response to glucose limitation;GO:1990872|negative regulation of sterol import by negative regulation of transcription from RNA polymerase II promoter;GO:0007232|osmosensory signaling pathway via Sho1 osmosensor;GO:0000750|pheromone-dependent …	GO:0005524|ATP binding;GO:0044025|histone kinase activity (H2B-S14 specific);GO:0008349|MAP kinase kinase kinase kinase activityGO:0004672|protein kinase activity;GO:0005524|ATP binding	GO:0005737|cytoplasm;GO:0000131|incipient cellular bud site;GO:0043332|mating projection tip;GO:0005634|nucleus	K04409|PAK1; p21-activated kinase 1 [EC:2.7.11.1]	map04062|Chemokine signaling pathway;map04011|MAPK signaling pathway - yeast;map04650|Natural killer cell mediated cytotoxicity;map05120|Epithelial cell signaling in Helicobacter pylori infection;map04360|Axon guidance;map04510|Focal adhesion;map05205|Proteoglycans in cancer;map04014|Ras signaling pathway;map04012|ErbB signaling pathway;map04024|cAMP signaling pathway;map04010|MAPK signaling path…
evm.model.contig3.904	Protein.evm.model.contig3.904::evm.model.contig3.904	2357967-2359578[-]	gi|636588890|ref|XM_008027593.1|	1051	E:0	Setosphaeria turcica Et28A hypothetical protein partial mRNA	OWY52830.1	1009	E:0	Cullin-like protein [Alternaria alternata]	PF00888.22	Cullin	Cullin family	COG5647	cullin 1	GO:0006974|cellular response to DNA damage stimulus;GO:0042769|DNA damage response, detection of DNA damage;GO:0000082|G1/S transition of mitotic cell cycle;GO:0070911|global genome nucleotide-excision repair;GO:0035518|histone H2A monoubiquitination;GO:0031175|neuron projection development;GO:0000715|nucleotide-excision repair, DNA damage recognition;GO:0000717|nucleotide-excision repair, DNA du…	GO:0031625|ubiquitin protein ligase bindingGO:0031625|ubiquitin protein ligase binding	GO:0080008|Cul4-RING E3 ubiquitin ligase complex;GO:0031465|Cul4B-RING E3 ubiquitin ligase complex;GO:0031461|cullin-RING ubiquitin ligase complex;GO:0005829|cytosol;GO:0070062|extracellular exosome;GO:0005654|nucleoplasm;GO:0019005|SCF ubiquitin ligase complex	K10609|CUL4; cullin 4	map04120|Ubiquitin mediated proteolysis;map03420|Nucleotide excision repair
evm.model.contig6.669	Protein.evm.model.contig6.669::evm.model.contig6.669	1756867-1759098[-]	gi|627914478|ref|XM_007692901.1|	1208	E:0	Bipolaris oryzae ATCC 44560 hypothetical protein partial mRNA	RII24546.1	1267	E:0	hypothetical protein CUC08_Gglean011555 [Alternaria sp. MG1]	PF00888.22	Cullin	Cullin family	COG5647	cullin 1	GO:0030154|cell differentiation;GO:0006935|chemotaxis;GO:0000082|G1/S transition of mitotic cell cycle;GO:0043161|proteasome-mediated ubiquitin-dependent protein catabolic process;GO:0031146|SCF-dependent proteasomal ubiquitin-dependent protein catabolic process;GO:0030587|sorocarp development;GO:0006511|ubiquitin-dependent protein catabolic processGO:0006511|ubiquitin-dependent protein catabolic…	GO:0031625|ubiquitin protein ligase binding;GO:0004842|ubiquitin-protein transferase activityGO:0031625|ubiquitin protein ligase binding	GO:0031461|cullin-RING ubiquitin ligase complex;GO:0019005|SCF ubiquitin ligase complex	K03347|CUL1, CDC53; cullin 1	map04141|Protein processing in endoplasmic reticulum;map04310|Wnt signaling pathway;map04350|TGF-beta signaling pathway;map04110|Cell cycle;map04111|Cell cycle - yeast;map04114|Oocyte meiosis;map04120|Ubiquitin mediated proteolysis;map04710|Circadian rhythm;map05168|Herpes simplex infection
evm.model.contig6.176	Protein.evm.model.contig6.176::evm.model.contig6.176	472517-473553[+]	gi|255937396|ref|XM_002559679.1|	137	E:1e-29	Penicillium chrysogenum Wisconsin 54-1255 hypothetical protein (Pc13g13110) mRNA, complete cds	XP_028507476.1	278	E:8e-89	hypothetical protein AA0111_g4759 [Alternaria arborescens]	PF03443.14	Glyco_hydro_61	Glycosyl hydrolase family 61	ENOG410YBW9	endo-glucanase	GO:0030245|cellulose catabolic process	GO:0030248|cellulose binding;GO:0016798|hydrolase activity, acting on glycosyl bonds;GO:0016491|oxidoreductase activity	GO:0005576|extracellular region	K19356|EGLD; cellulase [EC:3.2.1.4]	map01100|Metabolic pathways;map00500|Starch and sucrose metabolism
evm.model.contig5.758	Protein.evm.model.contig5.758::evm.model.contig5.758	1992951-1993986[-]	gi|189203934|ref|XM_001938268.1|	385	E:5e-104	Pyrenophora tritici-repentis Pt-1C-BFP citrate lyase subunit beta (Citrate (pro-3S)-lyase subunit beta), mRNA	XP_018386951.1	575	E:0	citrate lyase [Alternaria alternata]	PF03328.14	HpcH_HpaI	HpcH/HpaI aldolase/citrate lyase family	COG2301	citrate lyase	GO:0006084|acetyl-CoA metabolic process;GO:0006107|oxaloacetate metabolic process	GO:0008815|citrate (pro-3S)-lyase activity;GO:0008816|citryl-CoA lyase activity;GO:0000287|magnesium ion bindingGO:0003824|catalytic activity	GO:0009346|citrate lyase complex	K01644|citE; citrate lyase subunit beta / citryl-CoA lyase [EC:4.1.3.34]	map02020|Two-component system
evm.model.contig7.614	Protein.evm.model.contig7.614::evm.model.contig7.614	1572789-1573963[+]	gi|636583410|ref|XM_008024853.1|	1253	E:0	Setosphaeria turcica Et28A hypothetical protein mRNA	XP_018386637.1	661	E:0	clathrin adaptor, mu subunit [Alternaria alternata]	PF01217.20	Clat_adaptor_s	Clathrin adaptor complex small chain	ENOG410XPFS	Adaptor-related protein complex	GO:0072583|clathrin-dependent endocytosis;GO:0006886|intracellular protein transport;GO:0002092|positive regulation of receptor internalization;GO:1900244|positive regulation of synaptic vesicle endocytosis;GO:0098884|postsynaptic neurotransmitter receptor internalization;GO:0065003|protein-containing complex assembly;GO:0048488|synaptic vesicle endocytosis	GO:0097718|disordered domain specific binding;GO:0008289|lipid binding;GO:0050750|low-density lipoprotein particle receptor binding;GO:0005048|signal sequence binding	GO:0030122|AP-2 adaptor complex;GO:0098978|glutamatergic synapse;GO:0005886|plasma membrane;GO:0098794|postsynapse;GO:0043195|terminal bouton	K11826|AP2M1; AP-2 complex subunit mu-1	map04721|Synaptic vesicle cycle;map05016|Huntington's disease;map04961|Endocrine and other factor-regulated calcium reabsorption;map04144|Endocytosis
evm.model.contig5.963	Protein.evm.model.contig5.963::evm.model.contig5.963	2515832-2516511[+]	gi|627827908|ref|XM_007687643.1|	331	E:2e-88	Bipolaris oryzae ATCC 44560 hypothetical protein partial mRNA	RYN28738.1	160	E:2e-50	hypothetical protein AA0115_g5621 [Alternaria tenuissima]	PF08069.12	Ribosomal_S13_N	Ribosomal S13/S15 N-terminal domain	COG0184	Forms an intersubunit bridge (bridge B4) with the 23S rRNA of the 50S subunit in the ribosome (By similarity)	GO:0006412|translationGO:0006412|translation	GO:0070181|small ribosomal subunit rRNA binding;GO:0003735|structural constituent of ribosomeGO:0003735|structural constituent of ribosome	GO:0005618|cell wall;GO:0005829|cytosol;GO:0022626|cytosolic ribosome;GO:0022627|cytosolic small ribosomal subunit;GO:0005730|nucleolusGO:0005840|ribosome	K02953|RP-S13e, RPS13; small subunit ribosomal protein S13e	map03010|Ribosome
evm.model.contig8.198	Protein.evm.model.contig8.198::evm.model.contig8.198	605133-606438[-]	gi|627851413|ref|XM_007691257.1|	178	E:1e-41	Bipolaris oryzae ATCC 44560 glycoside hydrolase family 2 protein partial mRNA	RYO54835.1	736	E:0	hypothetical protein AA0116_g9895 [Alternaria tenuissima]	PF00703.21	Glyco_hydro_2	Glycosyl hydrolases family 2	COG3250	hydrolase family 2	GO:0005990|lactose catabolic processGO:0005975|carbohydrate metabolic process	GO:0004565|beta-galactosidase activity;GO:0030246|carbohydrate bindingGO:0004553|hydrolase activity, hydrolyzing O-glycosyl compounds	GO:0009341|beta-galactosidase complex	K01190|lacZ; beta-galactosidase [EC:3.2.1.23]	map01100|Metabolic pathways;map00511|Other glycan degradation;map00052|Galactose metabolism;map00600|Sphingolipid metabolism
evm.model.contig1.1773	Protein.evm.model.contig1.1773::evm.model.contig1.1773	4449318-4450442[+]	gi|702066572|emb|FO905652.1|	100	E:2e-18	Leptosphaeria biglobosa brassicae b35_scaffold00012 complete sequence	RYN32548.1	541	E:0	hypothetical protein AA0115_g3620 [Alternaria tenuissima]	PF00316.20	FBPase	Fructose-1-6-bisphosphatase, N-terminal domain	COG0158	D-fructose-1,6-bisphosphate 1-phosphohydrolase class 1	GO:0016051|carbohydrate biosynthetic process;GO:0042742|defense response to bacterium;GO:0030388|fructose 1,6-bisphosphate metabolic process;GO:0006002|fructose 6-phosphate metabolic process;GO:0006000|fructose metabolic process;GO:0006094|gluconeogenesis;GO:0019253|reductive pentose-phosphate cycle;GO:0019252|starch biosynthetic process;GO:0005986|sucrose biosynthetic process	GO:0042132|fructose 1,6-bisphosphate 1-phosphatase activity;GO:0046872|metal ion binding;GO:0050278|sedoheptulose-bisphosphatase activity	GO:0048046|apoplast;GO:0009507|chloroplast;GO:0009941|chloroplast envelope;GO:0009570|chloroplast stroma;GO:0005737|cytoplasm;GO:0005829|cytosol;GO:0009579|thylakoid	K01100|E3.1.3.37; sedoheptulose-bisphosphatase [EC:3.1.3.37]	map01120|Microbial metabolism in diverse environments;map01100|Metabolic pathways;map00710|Carbon fixation in photosynthetic organisms;map01200|Carbon metabolism
evm.model.contig1.1440	Protein.evm.model.contig1.1440::evm.model.contig1.1440	3515037-3517206[+]	gi|636593796|ref|XM_008030046.1|	353	E:3e-94	Setosphaeria turcica Et28A hypothetical protein partial mRNA	RYN59766.1	1302	E:0	hypothetical protein AA0114_g1121 [Alternaria tenuissima]	PF00270.29	DEAD	DEAD/DEAH box helicase	COG0514	atp-dependent dna helicase	GO:0032508|DNA duplex unwinding;GO:0006310|DNA recombination;GO:0006281|DNA repair;GO:0006260|DNA replication;GO:0009432|SOS response	GO:0043138|3'-5' DNA helicase activity;GO:0005524|ATP binding;GO:0003677|DNA binding;GO:0009378|four-way junction helicase activityGO:0003676|nucleic acid binding;GO:0005524|ATP binding	GO:0043590|bacterial nucleoid;GO:0005694|chromosome;GO:0005737|cytoplasm;GO:0030894|replisome	K03654|recQ; ATP-dependent DNA helicase RecQ [EC:3.6.4.12]	map03018|RNA degradation
evm.model.contig5.736	Protein.evm.model.contig5.736::evm.model.contig5.736	1946526-1949824[+]	gi|169602614|ref|XM_001794677.1|	283	E:6e-73	Phaeosphaeria nodorum SN15 hypothetical protein partial mRNA	RYO63049.1	2043	E:0	hypothetical protein AA0116_g4857 [Alternaria tenuissima]	PF13589.6	HATPase_c_3	Histidine kinase-, DNA gyrase B-, and HSP90-like ATPase	COG0323	This protein is involved in the repair of mismatches in DNA. It is required for dam-dependent methyl-directed DNA mismatch repair. May act as a molecular matchmaker , a protein that promotes the formation of a stable complex between two or more DNA-binding proteins in an ATP-dependent manner without itself being part of a final effector complex (By similarity)	GO:0006310|DNA recombination;GO:0010154|fruit development;GO:0006298|mismatch repair;GO:0009555|pollen development;GO:0048316|seed developmentGO:0006298|mismatch repair	GO:0005524|ATP binding;GO:0016887|ATPase activity;GO:0030983|mismatched DNA bindingGO:0005524|ATP binding;GO:0030983|mismatched DNA binding	GO:0032300|mismatch repair complex;GO:0032389|MutLalpha complex;GO:0005634|nucleus	K10858|PMS2; DNA mismatch repair protein PMS2	map03460|Fanconi anemia pathway;map03430|Mismatch repair
evm.model.contig6.792	Protein.evm.model.contig6.792::evm.model.contig6.792	2083370-2085268[+]	gi|636586448|ref|XM_008026372.1|	1009	E:0	Setosphaeria turcica Et28A hypothetical protein partial mRNA	RYN17644.1	982	E:0	hypothetical protein AA0115_g11715 [Alternaria tenuissima]	PF00782.20	DSPc	Dual specificity phosphatase, catalytic domain	COG2453	dual specificity phosphatase	GO:0030534|adult behavior;GO:0007568|aging;GO:0001525|angiogenesis;GO:0006915|apoptotic process;GO:0048854|brain morphogenesis;GO:0060070|canonical Wnt signaling pathway;GO:0048738|cardiac muscle tissue development;GO:0016477|cell migration;GO:0008283|cell population proliferation;GO:0071257|cellular response to electrical stimulus;GO:0071361|cellular response to ethanol;GO:0071456|cellular respo…	GO:0010997|anaphase-promoting complex binding;GO:0019899|enzyme binding;GO:0042802|identical protein binding;GO:0051717|inositol-1,3,4,5-tetrakisphosphate 3-phosphatase activity;GO:0035255|ionotropic glutamate receptor binding;GO:0008289|lipid binding;GO:0030165|PDZ domain binding;GO:0016314|phosphatidylinositol-3,4,5-trisphosphate 3-phosphatase activity;GO:0051800|phosphatidylinositol-3,4-bispho…	GO:0016324|apical plasma membrane;GO:0042995|cell projection;GO:0005737|cytoplasm;GO:0009898|cytoplasmic side of plasma membrane;GO:0005829|cytosol;GO:0043197|dendritic spine;GO:0005576|extracellular region;GO:0005739|mitochondrion;GO:0035749|myelin sheath adaxonal region;GO:0043005|neuron projection;GO:0005654|nucleoplasm;GO:0005634|nucleus;GO:0005886|plasma membrane;GO:0016605|PML body;GO:00995…	K01110|PTEN; phosphatidylinositol-3,4,5-trisphosphate 3-phosphatase and dual-specificity protein phosphatase PTEN [EC:3.1.3.16 3.1.3.48 3.1.3.67]	map04071|Sphingolipid signaling pathway;map00562|Inositol phosphate metabolism;map04150|mTOR signaling pathway;map04151|PI3K-Akt signaling pathway;map05206|MicroRNAs in cancer;map05215|Prostate cancer;map05200|Pathways in cancer;map04068|FoxO signaling pathway;map04530|Tight junction;map05213|Endometrial cancer;map05230|Central carbon metabolism in cancer;map05222|Small cell lung cancer;map05214|…
evm.model.contig10.242	Protein.evm.model.contig10.242::evm.model.contig10.242	607724-609361[-]	gi|928527637|ref|XM_014227141.1|	339	E:5e-90	Bipolaris maydis ATCC 48331 hypothetical protein mRNA	RYN51619.1	492	E:6e-169	hypothetical protein AA0114_g5229 [Alternaria tenuissima]	PF01149.24	Fapy_DNA_glyco	Formamidopyrimidine-DNA glycosylase N-terminal domain	COG0266	Involved in base excision repair of DNA damaged by oxidation or by mutagenic agents. Acts as DNA glycosylase that recognizes and removes damaged bases. Has a preference for oxidized purines, such as 7,8-dihydro-8-oxoguanine (8-oxoG). Has AP (apurinic apyrimidinic) lyase activity and introduces nicks in the DNA strand. Cleaves the DNA backbone by beta-delta elimination to generate a single-strand …	GO:0006284|base-excision repair;GO:0006281|DNA repair;GO:0006289|nucleotide-excision repair;GO:0006979|response to oxidative stressGO:0006284|base-excision repair;GO:0006289|nucleotide-excision repair	GO:0140078|class I DNA-(apurinic or apyrimidinic site) endonuclease activity;GO:0003684|damaged DNA binding;GO:0019104|DNA N-glycosylase activity;GO:0003906|DNA-(apurinic or apyrimidinic site) endonuclease activity;GO:0008534|oxidized purine nucleobase lesion DNA N-glycosylase activity;GO:0008270|zinc ion bindingGO:0003684|damaged DNA binding;GO:0003906|DNA-(apurinic or apyrimidinic site) endonuc…	GO:0005634|nucleus	K10563|mutM, fpg; formamidopyrimidine-DNA glycosylase [EC:3.2.2.23 4.2.99.18]	map03410|Base excision repair
evm.model.contig7.679	Protein.evm.model.contig7.679::evm.model.contig7.679	1731703-1733120[-]	gi|928526713|ref|XM_014226679.1|	326	E:4e-86	Bipolaris maydis ATCC 48331 hypothetical protein partial mRNA	RYO33357.1	628	E:0	hypothetical protein AG0111_g10886 [Alternaria gaisen]	PF04857.20	CAF1	CAF1 family ribonuclease	COG5228	Ccr4-not transcription complex, subunit	GO:0033962|cytoplasmic mRNA processing body assembly;GO:0000290|deadenylation-dependent decapping of nuclear-transcribed mRNA;GO:0051607|defense response to virus;GO:0006977|DNA damage response, signal transduction by p53 class mediator resulting in cell cycle arrest;GO:0043928|exonucleolytic catabolism of deadenylated mRNA;GO:0035195|gene silencing by miRNA;GO:0031047|gene silencing by RNA;GO:00…	GO:0000175|3'-5'-exoribonuclease activity;GO:0004532|exoribonuclease activity;GO:0046872|metal ion binding;GO:0004535|poly(A)-specific ribonuclease activity;GO:0003723|RNA binding;GO:0003714|transcription corepressor activity;GO:0008134|transcription factor binding	GO:0030014|CCR4-NOT complex;GO:0030015|CCR4-NOT core complex;GO:0005737|cytoplasm;GO:0005829|cytosol;GO:0075341|host cell PML body;GO:0016020|membrane;GO:0016604|nuclear body;GO:0016607|nuclear speck;GO:0005634|nucleus;GO:0000932|P-body	K12581|CNOT7_8, CAF1, POP2; CCR4-NOT transcription complex subunit 7/8	map03018|RNA degradation
evm.model.contig7.446	Protein.evm.model.contig7.446::evm.model.contig7.446	1148427-1149259[+]	gi|189190649|ref|XM_001931629.1|	418	E:3e-114	Pyrenophora tritici-repentis Pt-1C-BFP derlin-1.1, mRNA	RII10174.1	367	E:7e-126	hypothetical protein CUC08_Gglean006164 [Alternaria sp. MG1]	PF04511.15	DER1	Der1-like family	COG5291	Derlin 1	GO:0030968|endoplasmic reticulum unfolded protein response;GO:1904153|negative regulation of retrograde protein transport, ER to cytosol;GO:0018279|protein N-linked glycosylation via asparagine;GO:0030433|ubiquitin-dependent ERAD pathway	GO:0051787|misfolded protein binding;GO:1990381|ubiquitin-specific protease binding	GO:0000839|Hrd1p ubiquitin ligase ERAD-L complex;GO:0030176|integral component of endoplasmic reticulum membrane;GO:0048500|signal recognition particle;GO:0005785|signal recognition particle receptor complex	K13989|DERL2_3; Derlin-2/3	map04141|Protein processing in endoplasmic reticulum
evm.model.contig5.957	Protein.evm.model.contig5.957::evm.model.contig5.957	2498073-2500696[-]	gi|189203716|ref|XM_001938159.1|	725	E:0	Pyrenophora tritici-repentis Pt-1C-BFP cell cycle checkpoint protein RAD17, mRNA	RYN56587.1	697	E:0	hypothetical protein AA0114_g2790 [Alternaria tenuissima]	PF03215.15	Rad17	Rad17 P-loop domain	COG0470	DNA polymerase III subunit delta'	GO:0006974|cellular response to DNA damage stimulus;GO:0000077|DNA damage checkpoint;GO:0006281|DNA repair;GO:0007093|mitotic cell cycle checkpoint;GO:0033314|mitotic DNA replication checkpoint;GO:0007275|multicellular organism development;GO:0008156|negative regulation of DNA replication;GO:0042325|regulation of phosphorylation	GO:0005524|ATP binding;GO:0003682|chromatin binding;GO:0003689|DNA clamp loader activity	GO:0000781|chromosome, telomeric region;GO:0000790|nuclear chromatin;GO:0005730|nucleolus;GO:0005654|nucleoplasm;GO:0031389|Rad17 RFC-like complex	K06662|HRAD17, RAD24; cell cycle checkpoint protein	map04113|Meiosis - yeast;map04111|Cell cycle - yeast
evm.model.contig1.2153	Protein.evm.model.contig1.2153::evm.model.contig1.2153	5438984-5442760[+]	gi|702067518|emb|FO906717.1|	326	E:1e-85	Leptosphaeria maculans brassicae wa74_scaffold00369 complete sequence	RYN91566.1	2196	E:0	hypothetical protein AA0120_g5207 [Alternaria tenuissima]	PF00644.20	PARP	Poly(ADP-ribose) polymerase catalytic domain	ENOG410XRET	ubiquitin-conjugating enzyme	GO:0070936|protein K48-linked ubiquitination	GO:0005524|ATP binding;GO:0061631|ubiquitin conjugating enzyme activity;GO:0004842|ubiquitin-protein transferase activityGO:0003950|NAD+ ADP-ribosyltransferase activity	GO:0005737|cytoplasm	K10582|UBE2Q; ubiquitin-conjugating enzyme E2 Q [EC:2.3.2.23]	map04120|Ubiquitin mediated proteolysis
evm.model.contig3.920	Protein.evm.model.contig3.920::evm.model.contig3.920	2401750-2402714[+]	gi|628069062|ref|XM_007700995.1|	99	E:4e-18	Cochliobolus sativus ND90Pr hypothetical protein mRNA	RYO44579.1	290	E:1e-97	hypothetical protein AG0111_g4741 [Alternaria gaisen]	PF09349.10	OHCU_decarbox	OHCU decarboxylase	COG0044	Dihydroorotase	GO:0000256|allantoin catabolic process;GO:0006145|purine nucleobase catabolic process	GO:0004038|allantoinase activity;GO:0050897|cobalt ion binding;GO:0016888|endodeoxyribonuclease activity, producing 5'-phosphomonoesters;GO:0008270|zinc ion binding	GO:0005737|cytoplasm	K01466|allB; allantoinase [EC:3.5.2.5]	map01100|Metabolic pathways;map01120|Microbial metabolism in diverse environments;map00230|Purine metabolism
evm.model.contig1.982	Protein.evm.model.contig1.982::evm.model.contig1.982	2406727-2408607[-]	gi|628073470|ref|XM_007703199.1|	592	E:5e-166	Cochliobolus sativus ND90Pr hypothetical protein mRNA	XP_018389607.1	965	E:0	Vps36-domain-containing protein [Alternaria alternata]	PF11605.8	Vps36_ESCRT-II	Vacuolar protein sorting protein 36 Vps36	ENOG410XR74	vacuolar protein sorting	GO:0043328|protein transport to vacuole involved in ubiquitin-dependent protein catabolic process via the multivesicular body sorting pathway	GO:0032266|phosphatidylinositol-3-phosphate binding;GO:0043130|ubiquitin bindingGO:0032266|phosphatidylinositol-3-phosphate binding;GO:0043130|ubiquitin binding	GO:0005768|endosome;GO:0000814|ESCRT II complex;GO:0031902|late endosome membrane	K12190|VPS36, EAP45; ESCRT-II complex subunit VPS36	map04144|Endocytosis
evm.model.contig5.208	Protein.evm.model.contig5.208::evm.model.contig5.208	608080-610031[+]	gi|928525791|ref|XM_014226218.1|	525	E:4e-146	Bipolaris maydis ATCC 48331 hypothetical protein mRNA	RYO38330.1	612	E:0	hypothetical protein AG0111_g8387 [Alternaria gaisen]	PF00076.22	RRM_1	RNA recognition motif. (a.k.a. RRM, RBD, or RNP domain)	ENOG410XP92	splicing factor (U2AF)	GO:0000398|mRNA splicing, via spliceosome;GO:0051168|nuclear export;GO:0046833|positive regulation of RNA export from nucleus;GO:0000381|regulation of alternative mRNA splicing, via spliceosome;GO:0008380|RNA splicing	GO:0003729|mRNA binding;GO:0008187|poly-pyrimidine tract binding;GO:0030628|pre-mRNA 3'-splice site binding;GO:0003723|RNA bindingGO:0003676|nucleic acid binding	GO:0000243|commitment complex;GO:0016607|nuclear speck;GO:0005654|nucleoplasm;GO:0005634|nucleus;GO:0071011|precatalytic spliceosome;GO:0005681|spliceosomal complex;GO:0071004|U2-type prespliceosome;GO:0089701|U2AF	K12837|U2AF2; splicing factor U2AF 65 kDa subunit	map03040|Spliceosome
evm.model.contig2.233	Protein.evm.model.contig2.233::evm.model.contig2.233	710671-712100[-]	gi|636585816|ref|XM_008026056.1|	427	E:8e-117	Setosphaeria turcica Et28A hypothetical protein mRNA	OWY46611.1	312	E:3e-99	electron transfer protein 1, mitochondrial precursor [Alternaria alternata]	PF02628.15	COX15-CtaA	Cytochrome oxidase assembly protein	COG1612	Catalyzes the oxidation of the C8 methyl side group on heme O porphyrin ring into a formyl group (By similarity)	GO:0006784|heme a biosynthetic processGO:0006784|heme a biosynthetic process;GO:0055114|oxidation-reduction process	GO:0016653|oxidoreductase activity, acting on NAD(P)H, heme protein as acceptor;GO:0016627|oxidoreductase activity, acting on the CH-CH group of donorsGO:0016627|oxidoreductase activity, acting on the CH-CH group of donors	GO:0016021|integral component of membrane;GO:0005743|mitochondrial inner membrane;GO:0005739|mitochondrionGO:0016021|integral component of membrane	K02259|COX15; cytochrome c oxidase assembly protein subunit 15	map02020|Two-component system;map00860|Porphyrin and chlorophyll metabolism;map01100|Metabolic pathways;map00190|Oxidative phosphorylation;map01110|Biosynthesis of secondary metabolites
evm.model.contig1.1631	Protein.evm.model.contig1.1631::evm.model.contig1.1631	4047601-4049270[+]	gi|189208425|ref|XM_001940511.1|	344	E:1e-91	Pyrenophora tritici-repentis Pt-1C-BFP phosphatidylserine decarboxylase proenzyme, mRNA	OWY42319.1	628	E:0	phosphatidylserine decarboxylase [Alternaria alternata]	PF02666.15	PS_Dcarbxylase	Phosphatidylserine decarboxylase	COG0688	Phosphatidylserine decarboxylase	GO:0006646|phosphatidylethanolamine biosynthetic process;GO:0016540|protein autoprocessingGO:0008654|phospholipid biosynthetic process	GO:0004609|phosphatidylserine decarboxylase activityGO:0004609|phosphatidylserine decarboxylase activity	GO:0031305|integral component of mitochondrial inner membrane	K01613|psd, PISD; phosphatidylserine decarboxylase [EC:4.1.1.65]	map01100|Metabolic pathways;map01110|Biosynthesis of secondary metabolites;map00564|Glycerophospholipid metabolism
evm.model.contig2.1466	Protein.evm.model.contig2.1466::evm.model.contig2.1466	3715662-3716420[+]	gi|315039796|ref|XM_003169228.1|	80.5	E:1e-12	Arthroderma gypseum CBS 118893 3-hydroxyisobutyrate dehydrogenase (MGYG_08822) mRNA, complete cds	XP_018385482.1	311	E:2e-103	hypothetical protein CC77DRAFT_1020606 [Alternaria alternata]	PF02423.15	OCD_Mu_crystall	Ornithine cyclodeaminase/mu-crystallin family	COG2084	Dehydrogenase	GO:0006574|valine catabolic process	GO:0008442|3-hydroxyisobutyrate dehydrogenase activity;GO:0051287|NAD binding;GO:0050661|NADP bindingGO:0050661|NADP binding	GO:0005739|mitochondrion	K00020|E1.1.1.31, mmsB; 3-hydroxyisobutyrate dehydrogenase [EC:1.1.1.31]	map00280|Valine, leucine and isoleucine degradation;map01100|Metabolic pathways
evm.model.contig6.490	Protein.evm.model.contig6.490::evm.model.contig6.490	1296147-1297137[-]	gi|953439598|ref|XM_014706385.1|	876	E:0	Bipolaris victoriae FI3 hypothetical protein partial mRNA	RMZ67210.1	423	E:2e-148	Ras GTPase Rab11 [Pyrenophora seminiperda CCB06]	PF00071.22	Ras	Ras family	COG1100	GTP-binding Protein	GO:0150093|amyloid-beta clearance by transcytosis;GO:0071468|cellular response to acidic pH;GO:0045054|constitutive secretory pathway;GO:0090150|establishment of protein localization to membrane;GO:0006887|exocytosis;GO:0035773|insulin secretion involved in cellular response to glucose stimulus;GO:0006886|intracellular protein transport;GO:0032402|melanosome transport;GO:0032482|Rab protein signa…	GO:0019003|GDP binding;GO:0005525|GTP binding;GO:0003924|GTPase activity;GO:0031489|myosin V bindingGO:0003924|GTPase activity;GO:0005525|GTP binding	GO:0098993|anchored component of synaptic vesicle membrane;GO:0030054|cell junction;GO:0031410|cytoplasmic vesicle;GO:0005768|endosome;GO:0045335|phagocytic vesicle;GO:0030670|phagocytic vesicle membrane;GO:0055037|recycling endosome;GO:0055038|recycling endosome membrane;GO:0008021|synaptic vesicle	K07905|RAB11B; Ras-related protein Rab-11B	map04962|Vasopressin-regulated water reabsorption;map04152|AMPK signaling pathway;map04144|Endocytosis
evm.model.contig10.293	Protein.evm.model.contig10.293::evm.model.contig10.293	734650-740838[+]	gi|628081835|ref|XM_007704578.1|	686	E:0	Cochliobolus sativus ND90Pr hypothetical protein mRNA	OWY48492.1	1394	E:0	ethanolamine kinase 1 [Alternaria alternata]	PF12349.8	Sterol-sensing	Sterol-sensing domain of SREBP cleavage-activation	COG0510	Ethanolamine kinase	GO:0006646|phosphatidylethanolamine biosynthetic process	GO:0005524|ATP binding;GO:0004305|ethanolamine kinase activity	GO:0016021|integral component of membrane	K00894|ETNK, EKI; ethanolamine kinase [EC:2.7.1.82]	map01100|Metabolic pathways;map00564|Glycerophospholipid metabolism
evm.model.contig9.735	Protein.evm.model.contig9.735::evm.model.contig9.735	1966258-1971929[-]	gi|628088329|ref|XM_007707825.1|	556	E:5e-155	Cochliobolus sativus ND90Pr hypothetical protein partial mRNA	RYN18042.1	2813	E:0	hypothetical protein AA0115_g11486 [Alternaria tenuissima]	PF12796.7	Ank_2	Ankyrin repeats (3 copies)	COG0666	Ankyrin Repeat	GO:0007010|cytoskeleton organization;GO:0006888|endoplasmic reticulum to Golgi vesicle-mediated transport;GO:0006887|exocytosis;GO:0045199|maintenance of epithelial cell apical/basal polarity;GO:0010638|positive regulation of organelle organization;GO:0072659|protein localization to plasma membrane;GO:0007165|signal transduction	GO:0051117|ATPase binding;GO:0008093|cytoskeletal adaptor activity;GO:0019899|enzyme binding;GO:0044325|ion channel binding;GO:0019903|protein phosphatase binding;GO:0030507|spectrin binding;GO:0005200|structural constituent of cytoskeleton;GO:0005198|structural molecule activityGO:0005515|protein binding;GO:0008270|zinc ion binding	GO:0030673|axolemma;GO:0043194|axon initial segment;GO:0016323|basolateral plasma membrane;GO:0009898|cytoplasmic side of plasma membrane;GO:0005856|cytoskeleton;GO:0005829|cytosol;GO:0031430|M band;GO:0016020|membrane;GO:0005634|nucleus;GO:0005886|plasma membrane;GO:0045211|postsynaptic membrane;GO:0042383|sarcolemma;GO:0016529|sarcoplasmic reticulum;GO:0014731|spectrin-associated cytoskeleton;G…	K10380|ANK; ankyrin	map05205|Proteoglycans in cancer
evm.model.contig5.722	Protein.evm.model.contig5.722::evm.model.contig5.722	1908532-1910465[-]	gi|189197128|ref|XM_001934867.1|	750	E:0	Pyrenophora tritici-repentis Pt-1C-BFP D-lactate dehydrogenase, mitochondrial precursor, mRNA	XP_018386916.1	1086	E:0	D-lactate dehydrogenase mitochondrial precursor [Alternaria alternata]	PF01565.23	FAD_binding_4	FAD binding domain	COG0277	FAD linked oxidase domain protein	GO:1903457|lactate catabolic processGO:0055114|oxidation-reduction process	GO:0004458|D-lactate dehydrogenase (cytochrome) activity;GO:0071949|FAD bindingGO:0016491|oxidoreductase activity;GO:0050660|flavin adenine dinucleotide binding;GO:0003824|catalytic activity	GO:0005743|mitochondrial inner membrane;GO:0005759|mitochondrial matrix	K00102|dld, LDHD; D-lactate dehydrogenase (cytochrome) [EC:1.1.2.4]	map00620|Pyruvate metabolism
evm.model.contig5.529	Protein.evm.model.contig5.529::evm.model.contig5.529	1399184-1400992[-]	gi|378941885|gb|JN900389.1|	1042	E:0	Alternaria alternata NADPH oxidase gene, complete cds	XP_018380435.1	1054	E:0	NADPH oxidase [Alternaria alternata]	PF01794.19	Ferric_reduct	Ferric reductase like transmembrane component	ENOG410XNZY	NADPH Oxidase	GO:0001525|angiogenesis;GO:0016477|cell migration;GO:0071455|cellular response to hyperoxia;GO:1990451|cellular stress response to acidic pH;GO:0006952|defense response;GO:0030198|extracellular matrix organization;GO:0042743|hydrogen peroxide metabolic process;GO:0051454|intracellular pH elevation;GO:0055114|oxidation-reduction process;GO:0072592|oxygen metabolic process;GO:0008284|positive regul…	GO:0046872|metal ion binding;GO:0048365|Rac GTPase binding;GO:0016175|superoxide-generating NADPH oxidase activityGO:0016491|oxidoreductase activity	GO:0030054|cell junction;GO:0005737|cytoplasm;GO:0005769|early endosome;GO:0005768|endosome;GO:0071438|invadopodium membrane;GO:0043020|NADPH oxidase complex;GO:0005886|plasma membrane	K08008|NOX, GP91; NADPH oxidase	map04066|HIF-1 signaling pathway;map04670|Leukocyte transendothelial migration;map04380|Osteoclast differentiation;map04145|Phagosome
evm.model.contig4.590	Protein.evm.model.contig4.590::evm.model.contig4.590	1628663-1630931[-]	gi|636595302|ref|XM_008030799.1|	931	E:0	Setosphaeria turcica Et28A hypothetical protein partial mRNA	XP_018391588.1	1045	E:0	F-box/WD repeat-containing protein pof1 [Alternaria alternata]	PF00646.33	F-box	F-box domain	ENOG410XRWX	F-box and WD repeat domain containing 7, E3 ubiquitin protein ligase	GO:0007411|axon guidance;GO:0035147|branch fusion, open tracheal system;GO:0071456|cellular response to hypoxia;GO:0042023|DNA endoreduplication;GO:1900038|negative regulation of cellular response to hypoxia;GO:0060253|negative regulation of glial cell proliferation;GO:0045926|negative regulation of growth;GO:0045571|negative regulation of imaginal disc growth;GO:0016567|protein ubiquitination;GO…	GO:0030332|cyclin binding;GO:1990381|ubiquitin-specific protease bindingGO:0005515|protein binding	GO:0005634|nucleus;GO:0019005|SCF ubiquitin ligase complex	K10260|FBXW7, SEL10; F-box and WD-40 domain protein 7	map04120|Ubiquitin mediated proteolysis
evm.model.contig9.267	Protein.evm.model.contig9.267::evm.model.contig9.267	693435-695376[+]	gi|702073471|emb|FO905845.1|	505	E:6e-140	Leptosphaeria biglobosa Thlaspii ibcn65_scaffold00056 complete sequence	RII19241.1	1045	E:0	hypothetical protein CUC08_Gglean001905 [Alternaria sp. MG1]	PF00199.19	Catalase	Catalase	COG0753	Catalase	GO:0042744|hydrogen peroxide catabolic process;GO:0042542|response to hydrogen peroxideGO:0055114|oxidation-reduction process	GO:0004096|catalase activity;GO:0020037|heme binding;GO:0046872|metal ion bindingGO:0004096|catalase activity;GO:0020037|heme binding	GO:0005737|cytoplasm	K03781|katE, CAT, catB, srpA; catalase [EC:1.11.1.6]	map01200|Carbon metabolism;map00630|Glyoxylate and dicarboxylate metabolism;map04146|Peroxisome;map04068|FoxO signaling pathway;map01110|Biosynthesis of secondary metabolites;map05014|Amyotrophic lateral sclerosis (ALS);map00380|Tryptophan metabolism;map01130|Biosynthesis of antibiotics
evm.model.contig1.600	Protein.evm.model.contig1.600::evm.model.contig1.600	1498655-1499071[-]	gi|627921159|ref|XM_007695016.1|	333	E:5e-89	Bipolaris oryzae ATCC 44560 hypothetical protein partial mRNA	XP_028512347.1	176	E:1e-53	hypothetical protein AA0111_g371 [Alternaria arborescens]	PF05241.12	EBP	Emopamil binding protein	ENOG41101ES	emopamil binding protein (sterol isomerase)	GO:0006695|cholesterol biosynthetic process;GO:0030097|hemopoiesis;GO:0016126|sterol biosynthetic processGO:0016125|sterol metabolic process	GO:0000247|C-8 sterol isomerase activity;GO:0047750|cholestenol delta-isomerase activity;GO:0004769|steroid delta-isomerase activityGO:0047750|cholestenol delta-isomerase activity	GO:0031410|cytoplasmic vesicle;GO:0005783|endoplasmic reticulum;GO:0005789|endoplasmic reticulum membrane;GO:0016021|integral component of membrane;GO:0043231|intracellular membrane-bounded organelle;GO:0005635|nuclear envelopeGO:0016021|integral component of membrane	K01824|EBP; cholestenol delta-isomerase [EC:5.3.3.5]	map00100|Steroid biosynthesis;map01100|Metabolic pathways;map01110|Biosynthesis of secondary metabolites
evm.model.contig5.202	Protein.evm.model.contig5.202::evm.model.contig5.202	589041-590567[-]	gi|573976687|ref|XM_006666226.1|	110	E:5e-21	Cordyceps militaris CM01 dtdp-glucose 4,6-dehydratase (CCM_01068), partial mRNA	RYN65735.1	705	E:0	Trifunctional UDP-glucose 4,6-dehydratase/UDP-4-keto-6-deoxy-D-glucose 3,5-epimerase/UDP-4-keto-L-rhamnose-reductase [Alternaria tenuissima]	PF16363.5	GDP_Man_Dehyd	GDP-mannose 4,6 dehydratase	COG1088	dTDP-glucose 4-6-dehydratase	GO:0010315|auxin efflux;GO:0030154|cell differentiation;GO:0071555|cell wall organization;GO:0051555|flavonol biosynthetic process;GO:0042127|regulation of cell population proliferation;GO:0010253|UDP-rhamnose biosynthetic processGO:0006694|steroid biosynthetic process;GO:0055114|oxidation-reduction process	GO:0008460|dTDP-glucose 4,6-dehydratase activity;GO:0016853|isomerase activity;GO:0016491|oxidoreductase activity;GO:0050377|UDP-glucose 4,6-dehydratase activity;GO:0010280|UDP-L-rhamnose synthase activityGO:0003824|catalytic activity;GO:0050662|coenzyme binding;GO:0003854|3-beta-hydroxy-delta5-steroid dehydrogenase activity;GO:0016616|oxidoreductase activity, acting on the CH-OH group of donors,…	GO:0005829|cytosol;GO:0005739|mitochondrion;GO:0009506|plasmodesma	K12450|RHM; UDP-glucose 4,6-dehydratase [EC:4.2.1.76]	map00520|Amino sugar and nucleotide sugar metabolism
evm.model.contig2.899	Protein.evm.model.contig2.899::evm.model.contig2.899	2304702-2305780[+]	gi|636594360|ref|XM_008030328.1|	414	E:6e-113	Setosphaeria turcica Et28A hypothetical protein partial mRNA	XP_018387790.1	496	E:9e-175	ribosomal protein L1 [Alternaria alternata]	PF00687.21	Ribosomal_L1	Ribosomal protein L1p/L10e family	COG0081	Binds directly to 23S rRNA. The L1 stalk is quite mobile in the ribosome, and is involved in E site tRNA release (By similarity)	GO:0006417|regulation of translation;GO:0006412|translation	GO:0019843|rRNA binding;GO:0003735|structural constituent of ribosome;GO:0000049|tRNA binding	GO:0015934|large ribosomal subunit	K02863|RP-L1, MRPL1, rplA; large subunit ribosomal protein L1	map03010|Ribosome
evm.model.contig1.82	Protein.evm.model.contig1.82::evm.model.contig1.82	233004-234250[-]	gi|702073523|emb|FO905897.1|	483	E:2e-133	Leptosphaeria biglobosa Thlaspii ibcn65_scaffold00004 complete sequence	RYN39371.1	740	E:0	Intron-binding protein aquarius [Alternaria tenuissima]	PF13086.6	AAA_11	AAA domain	ENOG410XPV8	Aquarius homolog (Mouse)	GO:0000398|mRNA splicing, via spliceosome;GO:0006283|transcription-coupled nucleotide-excision repair	GO:0005524|ATP binding;GO:0003729|mRNA binding;GO:0003723|RNA binding;GO:0003724|RNA helicase activityGO:0003677|DNA binding;GO:0005524|ATP binding;GO:0016787|hydrolase activity	GO:0071013|catalytic step 2 spliceosome;GO:0016020|membrane;GO:0005654|nucleoplasm;GO:0005634|nucleus;GO:0005681|spliceosomal complex;GO:0071007|U2-type catalytic step 2 spliceosome	K12874|AQR; intron-binding protein aquarius	map03040|Spliceosome
evm.model.contig4.730	Protein.evm.model.contig4.730::evm.model.contig4.730	2012083-2013541[+]	gi|189206633|ref|XM_001939616.1|	1029	E:0	Pyrenophora tritici-repentis Pt-1C-BFP sterol O-acyltransferase 2, mRNA	RYN82000.1	827	E:0	hypothetical protein AA0117_g2139 [Alternaria alternata]	PF03062.19	MBOAT	MBOAT, membrane-bound O-acyltransferase family	COG5056	Oacyltransferase	GO:0006071|glycerol metabolic process;GO:0019432|triglyceride biosynthetic process	GO:0004144|diacylglycerol O-acyltransferase activity	GO:0009941|chloroplast envelope;GO:0005789|endoplasmic reticulum membrane;GO:0016021|integral component of membrane	K11155|DGAT1; diacylglycerol O-acyltransferase 1 [EC:2.3.1.20 2.3.1.75 2.3.1.76]	map00830|Retinol metabolism;map00561|Glycerolipid metabolism;map04975|Fat digestion and absorption;map01100|Metabolic pathways
evm.model.contig4.895	Protein.evm.model.contig4.895::evm.model.contig4.895	2422336-2423306[-]	gi|628236067|ref|XM_007719006.1|	538	E:3e-150	Bipolaris zeicola 26-R-13 hypothetical protein partial mRNA	XP_018391262.1	560	E:0	aldolase [Alternaria alternata]	PF00701.22	DHDPS	Dihydrodipicolinate synthetase family	COG0329	Catalyzes the condensation of (S)-aspartate-beta- semialdehyde (S)-ASA and pyruvate to 4-hydroxy- tetrahydrodipicolinate (HTPA) (By similarity)	GO:0019877|diaminopimelate biosynthetic process;GO:0009089|lysine biosynthetic process via diaminopimelate	GO:0008840|4-hydroxy-tetrahydrodipicolinate synthaseGO:0016829|lyase activity	GO:0005737|cytoplasm	K01714|dapA; 4-hydroxy-tetrahydrodipicolinate synthase [EC:4.3.3.7]	map01230|Biosynthesis of amino acids;map00261|Monobactam biosynthesis;map00300|Lysine biosynthesis;map01110|Biosynthesis of secondary metabolites;map01100|Metabolic pathways;map01120|Microbial metabolism in diverse environments;map01130|Biosynthesis of antibiotics
evm.model.contig1.592	Protein.evm.model.contig1.592::evm.model.contig1.592	1473314-1475397[+]	gi|636593064|ref|XM_008029680.1|	481	E:1e-132	Setosphaeria turcica Et28A hypothetical protein mRNA	XP_018389977.1	967	E:0	glutamate decarboxylase [Alternaria alternata]	PF00282.19	Pyridoxal_deC	Pyridoxal-dependent decarboxylase conserved domain	COG0076	decarboxylase	GO:0006538|glutamate catabolic processGO:0019752|carboxylic acid metabolic process	GO:0005516|calmodulin binding;GO:0004351|glutamate decarboxylase activity;GO:0030170|pyridoxal phosphate bindingGO:0016831|carboxy-lyase activity;GO:0030170|pyridoxal phosphate binding	GO:0005829|cytosol;GO:0005739|mitochondrion;GO:0005634|nucleus	K01580|E4.1.1.15, gadB, gadA, GAD; glutamate decarboxylase [EC:4.1.1.15]	map00430|Taurine and hypotaurine metabolism;map00250|Alanine, aspartate and glutamate metabolism;map00410|beta-Alanine metabolism;map01110|Biosynthesis of secondary metabolites;map04727|GABAergic synapse;map04940|Type I diabetes mellitus;map01100|Metabolic pathways;map00650|Butanoate metabolism
evm.model.contig1.2086	Protein.evm.model.contig1.2086::evm.model.contig1.2086	5249860-5250810[+]	gi|928521585|ref|XM_014224115.1|	745	E:0	Bipolaris maydis ATCC 48331 hypothetical protein partial mRNA	XP_028511503.1	434	E:4e-151	F-actin-capping protein subunit alpha [Alternaria arborescens]	PF01267.17	F-actin_cap_A	F-actin capping protein alpha subunit	ENOG410ZAWX	capping protein (actin filament) muscle Z-line, alpha	GO:0051016|barbed-end actin filament cappingGO:0051016|barbed-end actin filament capping	GO:0003779|actin binding	GO:0005737|cytoplasm;GO:0008290|F-actin capping protein complexGO:0008290|F-actin capping protein complex	K10364|CAPZA; capping protein (actin filament) muscle Z-line, alpha	map04144|Endocytosis
evm.model.contig1.1680	Protein.evm.model.contig1.1680::evm.model.contig1.1680	4200891-4202067[-]	gi|636592758|ref|XM_008029527.1|	636	E:1e-179	Setosphaeria turcica Et28A hypothetical protein mRNA	RII12735.1	505	E:5e-178	hypothetical protein CUC08_Gglean004852 [Alternaria sp. MG1]	PF00561.20	Abhydrolase_1	alpha/beta hydrolase fold	COG2021	homoserine O-acetyltransferase	GO:0009058|biosynthetic process	GO:0016747|transferase activity, transferring acyl groups other than amino-acyl groups	GO:0005737|cytoplasm	K00641|metX; homoserine O-acetyltransferase [EC:2.3.1.31]	map01100|Metabolic pathways;map00270|Cysteine and methionine metabolism;map01130|Biosynthesis of antibiotics
evm.model.contig3.47	Protein.evm.model.contig3.47::evm.model.contig3.47	129892-131434[+]	gi|396461676|ref|XM_003835402.1|	448	E:7e-123	Leptosphaeria maculans JN3 similar to ethanolamine-phosphate cytidylyltransferase (LEMA_P047910.1) mRNA, complete cds	XP_008020314.1	505	E:4e-174	hypothetical protein SETTUDRAFT_41058 [Exserohilum turcica Et28A]	PF01467.26	CTP_transf_like	Cytidylyltransferase-like	COG0615	cytidylyltransferase	GO:0006646|phosphatidylethanolamine biosynthetic process;GO:0008654|phospholipid biosynthetic processGO:0009058|biosynthetic process	GO:0004306|ethanolamine-phosphate cytidylyltransferase activityGO:0003824|catalytic activity	GO:0005789|endoplasmic reticulum membrane	K00967|PCYT2; ethanolamine-phosphate cytidylyltransferase [EC:2.7.7.14]	map00440|Phosphonate and phosphinate metabolism;map01100|Metabolic pathways;map00564|Glycerophospholipid metabolism
evm.model.contig7.323	Protein.evm.model.contig7.323::evm.model.contig7.323	832438-834171[+]	gi|928515267|ref|XM_014220956.1|	1090	E:0	Bipolaris maydis ATCC 48331 glycosyltransferase family 22 protein partial mRNA	XP_018385099.1	954	E:0	hypothetical protein CC77DRAFT_134451 [Alternaria alternata]	PF03901.17	Glyco_transf_22	Alg9-like mannosyltransferase family	ENOG410XTCB	Phosphatidylinositol glycan anchor biosynthesis, class Z	GO:0006506|GPI anchor biosynthetic process	GO:0016757|transferase activity, transferring glycosyl groupsGO:0016757|transferase activity, transferring glycosyl groups	GO:0005789|endoplasmic reticulum membrane;GO:0016021|integral component of membrane	K08098|PIGZ, SMP3; phosphatidylinositol glycan, class Z [EC:2.4.1.-]	map00563|Glycosylphosphatidylinositol(GPI)-anchor biosynthesis
evm.model.contig1.539	Protein.evm.model.contig1.539::evm.model.contig1.539	1328684-1330395[+]	gi|189210282|ref|XM_001941438.1|	616	E:2e-173	Pyrenophora tritici-repentis Pt-1C-BFP cystathionine beta-synthase, mRNA	OWY44428.1	454	E:4e-152	cystathionine beta-synthase [Alternaria alternata]	PF00291.25	PALP	Pyridoxal-phosphate dependent enzyme	COG0031	cysteine biosynthetic process from serine	GO:0071456|cellular response to hypoxia;GO:0006535|cysteine biosynthetic process from serine;GO:0019343|cysteine biosynthetic process via cystathionine;GO:0043418|homocysteine catabolic process;GO:0050667|homocysteine metabolic process;GO:0070814|hydrogen sulfide biosynthetic process;GO:0006563|L-serine metabolic process;GO:0043066|negative regulation of apoptotic process;GO:0031667|response to n…	GO:0004122|cystathionine beta-synthase activity;GO:0004124|cysteine synthase activity;GO:0020037|heme binding;GO:0046872|metal ion binding;GO:0042803|protein homodimerization activity;GO:0030170|pyridoxal phosphate binding	GO:0005737|cytoplasm;GO:0005829|cytosol;GO:0005634|nucleus	K01697|E4.2.1.22, CBS; cystathionine beta-synthase [EC:4.2.1.22]	map01230|Biosynthesis of amino acids;map00260|Glycine, serine and threonine metabolism;map01100|Metabolic pathways;map00270|Cysteine and methionine metabolism;map01130|Biosynthesis of antibiotics;map01200|Carbon metabolism;map00920|Sulfur metabolism;map01110|Biosynthesis of secondary metabolites;map01120|Microbial metabolism in diverse environments
evm.model.contig8.488	Protein.evm.model.contig8.488::evm.model.contig8.488	1419845-1426031[+]	gi|628070744|ref|XM_007701836.1|	815	E:0	Cochliobolus sativus ND90Pr hypothetical protein mRNA	XP_018390736.1	2677	E:0	hypothetical protein CC77DRAFT_312236 [Alternaria alternata]	PF16172.5	DOCK_N	DOCK N-terminus	ENOG410XQH7	Dedicator of cytokinesis	GO:0060326|cell chemotaxis;GO:1904694|negative regulation of vascular smooth muscle contraction;GO:1904754|positive regulation of vascular associated smooth muscle cell migration;GO:0007264|small GTPase mediated signal transduction	GO:0005096|GTPase activator activity;GO:0005085|guanyl-nucleotide exchange factor activity;GO:0030165|PDZ domain binding;GO:0048365|Rac GTPase binding;GO:0030971|receptor tyrosine kinase binding;GO:0017124|SH3 domain binding	GO:0005829|cytosol;GO:0005794|Golgi apparatus;GO:0016020|membrane;GO:0005730|nucleolus;GO:0005886|plasma membrane;GO:0032420|stereocilium;GO:0032421|stereocilium bundle	K17697|DOCK4; dedicator of cytokinesis protein 4	map04015|Rap1 signaling pathway
evm.model.contig9.703	Protein.evm.model.contig9.703::evm.model.contig9.703	1873478-1875571[-]	gi|636591374|ref|XM_008028835.1|	1655	E:0	Setosphaeria turcica Et28A hypothetical protein partial mRNA	XP_018380303.1	1249	E:0	alcohol oxidase p68 [Alternaria alternata]	PF00732.19	GMC_oxred_N	GMC oxidoreductase	COG2303	oxidoreductase	GO:0046188|methane catabolic process;GO:0015945|methanol metabolic processGO:0055114|oxidation-reduction process	GO:0047639|alcohol oxidase activity;GO:0050660|flavin adenine dinucleotide bindingGO:0016614|oxidoreductase activity, acting on CH-OH group of donors;GO:0050660|flavin adenine dinucleotide binding	GO:0005782|peroxisomal matrix	K17066|MOX; alcohol oxidase [EC:1.1.3.13]	map01200|Carbon metabolism;map01100|Metabolic pathways;map01120|Microbial metabolism in diverse environments;map00680|Methane metabolism
evm.model.contig5.561	Protein.evm.model.contig5.561::evm.model.contig5.561	1485975-1488296[+]	gi|628072822|ref|XM_007702875.1|	1144	E:0	Cochliobolus sativus ND90Pr hypothetical protein mRNA	RYN80076.1	1129	E:0	hypothetical protein AA0117_g3065 [Alternaria alternata]	PF04727.13	ELMO_CED12	ELMO/CED-12 family	ENOG410XPKN	Engulfment and cell motility	GO:0006915|apoptotic process;GO:0060326|cell chemotaxis;GO:0098609|cell-cell adhesion;GO:0007010|cytoskeleton organization;GO:0038096|Fc-gamma receptor signaling pathway involved in phagocytosis;GO:0048010|vascular endothelial growth factor receptor signaling pathway	GO:0030971|receptor tyrosine kinase binding;GO:0017124|SH3 domain binding	GO:0005829|cytosol;GO:0016020|membrane	K18985|ELMO2, CED12A; engulfment and cell motility protein 2	map05131|Shigellosis;map05100|Bacterial invasion of epithelial cells
evm.model.contig6.15	Protein.evm.model.contig6.15::evm.model.contig6.15	34734-36560[+]	gi|928523851|ref|XM_014225248.1|	804	E:0	Bipolaris maydis ATCC 48331 hypothetical protein partial mRNA	RYN18830.1	1056	E:0	hypothetical protein AA0115_g11089 [Alternaria tenuissima]	PF08221.11	HTH_9	RNA polymerase III subunit RPC82 helix-turn-helix domain	ENOG410XPVH	DNA-dependent RNA polymerase catalyzes the transcription of DNA into RNA using the four ribonucleoside triphosphates as substrates. Specific core component of RNA polymerase III which synthesizes small RNAs, such as 5S rRNA and tRNAs	GO:0006351|transcription, DNA-templatedGO:0006351|transcription, DNA-templated	GO:0003899|DNA-directed 5'-3' RNA polymerase activity;GO:0003697|single-stranded DNA bindingGO:0003677|DNA binding;GO:0003899|DNA-directed 5'-3' RNA polymerase activity	GO:0005666|RNA polymerase III complex	K03023|RPC3, POLR3C; DNA-directed RNA polymerase III subunit RPC3	map03020|RNA polymerase;map04623|Cytosolic DNA-sensing pathway;map00240|Pyrimidine metabolism;map01100|Metabolic pathways;map05169|Epstein-Barr virus infection;map00230|Purine metabolism
evm.model.contig3.822	Protein.evm.model.contig3.822::evm.model.contig3.822	2135951-2137611[+]	gi|189198885|ref|XM_001935745.1|	904	E:0	Pyrenophora tritici-repentis Pt-1C-BFP inositol-3-phosphate synthase, mRNA	XP_009649713.1	660	E:0	inositol-3-phosphate synthase [Verticillium dahliae VdLs.17]	PF07994.12	NAD_binding_5	Myo-inositol-1-phosphate synthase	COG1260	synthase	GO:0006914|autophagy;GO:0031589|cell-substrate adhesion;GO:0006021|inositol biosynthetic process;GO:0000281|mitotic cytokinesis;GO:0008654|phospholipid biosynthetic process;GO:1903725|regulation of phospholipid metabolic processGO:0006021|inositol biosynthetic process;GO:0008654|phospholipid biosynthetic process	GO:0004512|inositol-3-phosphate synthase activityGO:0004512|inositol-3-phosphate synthase activity	GO:0005737|cytoplasm;GO:0005829|cytosol	K01858|INO1, ISYNA1; myo-inositol-1-phosphate synthase [EC:5.5.1.4]	map00562|Inositol phosphate metabolism;map01100|Metabolic pathways;map00521|Streptomycin biosynthesis;map01130|Biosynthesis of antibiotics
evm.model.contig9.749	Protein.evm.model.contig9.749::evm.model.contig9.749	1994835-1997237[-]	gi|636592346|ref|XM_008029321.1|	477	E:2e-131	Setosphaeria turcica Et28A hypothetical protein partial mRNA	RYN56863.1	1180	E:0	hypothetical protein AA0118_g8129 [Alternaria tenuissima]	PF07690.16	MFS_1	Major Facilitator Superfamily	ENOG410XQKC	major facilitator superfamily	GO:0055085|transmembrane transport	GO:0005351|carbohydrate:proton symporter activityGO:0022857|transmembrane transporter activity	GO:0005887|integral component of plasma membraneGO:0016021|integral component of membrane	K08139|HXT; MFS transporter, SP family, sugar:H+ symporter	map04113|Meiosis - yeast
evm.model.contig4.958	Protein.evm.model.contig4.958::evm.model.contig4.958	2585845-2590987[+]	gi|169595339|ref|XM_001791042.1|	728	E:0	Phaeosphaeria nodorum SN15 hypothetical protein partial mRNA	OWY41997.1	2729	E:0	isoleucyl-tRNA synthetase [Alternaria alternata]	PF03676.14	UPF0183	Uncharacterised protein family (UPF0183)	COG0060	amino acids such as valine, to avoid such errors it has two additional distinct tRNA(Ile)-dependent editing activities. One activity is designated as 'pretransfer' editing and involves the hydrolysis of activated Val-AMP. The other activity is designated 'posttransfer' editing and involves deacylation of mischarged Val-tRNA(Ile) (By similarity)	GO:0006428|isoleucyl-tRNA aminoacylationGO:0006418|tRNA aminoacylation for protein translation	GO:0002161|aminoacyl-tRNA editing activity;GO:0005524|ATP binding;GO:0004822|isoleucine-tRNA ligase activity;GO:0000049|tRNA binding;GO:0008270|zinc ion bindingGO:0000166|nucleotide binding;GO:0004812|aminoacyl-tRNA ligase activity;GO:0005524|ATP binding	GO:0005737|cytoplasm	K01870|IARS, ileS; isoleucyl-tRNA synthetase [EC:6.1.1.5]	map00970|Aminoacyl-tRNA biosynthesis
evm.model.contig2.1091	Protein.evm.model.contig2.1091::evm.model.contig2.1091	2787866-2794846[-]	gi|702073679|emb|FO906026.1|	1437	E:0	Leptosphaeria maculans brassicae jn3_SuperContig_7 complete sequence	RYN46387.1	2164	E:0	Pre-mRNA-processing-splicing factor 8 [Alternaria tenuissima]	PF08082.11	PRO8NT	PRO8NT (NUC069), PrP8 N-terminal domain	COG5178	PRP8 pre-mRNA processing factor 8 homolog (S. cerevisiae)	GO:0071222|cellular response to lipopolysaccharide;GO:0071356|cellular response to tumor necrosis factor;GO:0006397|mRNA processing;GO:0000398|mRNA splicing, via spliceosome;GO:0008380|RNA splicing;GO:0000375|RNA splicing, via transesterification reactions;GO:0000244|spliceosomal tri-snRNP complex assemblyGO:0000398|mRNA splicing, via spliceosome	GO:0070530|K63-linked polyubiquitin modification-dependent protein binding;GO:0097157|pre-mRNA intronic binding;GO:0003723|RNA binding;GO:0000386|second spliceosomal transesterification activity;GO:0030619|U1 snRNA binding;GO:0030620|U2 snRNA binding;GO:0030623|U5 snRNA binding;GO:0017070|U6 snRNA bindingGO:0003723|RNA binding;GO:0030623|U5 snRNA binding;GO:0017070|U6 snRNA binding	GO:0071013|catalytic step 2 spliceosome;GO:0016020|membrane;GO:0016607|nuclear speck;GO:0005654|nucleoplasm;GO:0005634|nucleus;GO:0071006|U2-type catalytic step 1 spliceosome;GO:0071007|U2-type catalytic step 2 spliceosome;GO:0071005|U2-type precatalytic spliceosome;GO:0046540|U4/U6 x U5 tri-snRNP complex;GO:0005682|U5 snRNP	K12856|PRPF8, PRP8; pre-mRNA-processing factor 8	map03040|Spliceosome
evm.model.contig1.2422	Protein.evm.model.contig1.2422::evm.model.contig1.2422	6182095-6182613[+]	gi|189191175|ref|XM_001931892.1|	453	E:7e-125	Pyrenophora tritici-repentis Pt-1C-BFP 60S ribosomal protein L6, partial mRNA	XP_018386134.1	184	E:7e-56	hypothetical protein CC77DRAFT_78491 [Alternaria alternata]	PF01159.19	Ribosomal_L6e	Ribosomal protein L6e	COG2163	(ribosomal) protein	GO:0002181|cytoplasmic translation;GO:0000027|ribosomal large subunit assemblyGO:0006412|translation	GO:0003723|RNA binding;GO:0003735|structural constituent of ribosomeGO:0003735|structural constituent of ribosome	GO:0022625|cytosolic large ribosomal subunit;GO:0031012|extracellular matrixGO:0005622|intracellular;GO:0005840|ribosome	K02934|RP-L6e, RPL6; large subunit ribosomal protein L6e	map03010|Ribosome
evm.model.contig2.2117	Protein.evm.model.contig2.2117::evm.model.contig2.2117	5375304-5376393[-]	gi|189208180|ref|XM_001940389.1|	292	E:3e-76	Pyrenophora tritici-repentis Pt-1C-BFP hypothetical protein, mRNA	RII22795.1	478	E:3e-167	hypothetical protein CUC08_Gglean013234 [Alternaria sp. MG1]	PF13920.6	zf-C3HC4_3	Zinc finger, C3HC4 type (RING finger)	ENOG4111IHV	Ring finger protein	GO:0006914|autophagy;GO:0071712|ER-associated misfolded protein catabolic process;GO:0006511|ubiquitin-dependent protein catabolic process	GO:0046872|metal ion binding;GO:0061630|ubiquitin protein ligase activity;GO:0044390|ubiquitin-like protein conjugating enzyme bindingGO:0046872|metal ion binding	GO:0036513|Derlin-1 retrotranslocation complex;GO:0016021|integral component of membrane;GO:0005741|mitochondrial outer membrane	K10666|RNF5; E3 ubiquitin-protein ligase RNF5 [EC:2.3.2.27]	map04141|Protein processing in endoplasmic reticulum
evm.model.contig4.570	Protein.evm.model.contig4.570::evm.model.contig4.570	1583418-1585754[+]	gi|189209657|ref|XM_001941126.1|	874	E:0	Pyrenophora tritici-repentis Pt-1C-BFP protein phosphatase regulator, mRNA	XP_014078502.1	831	E:0	carbohydrate-binding module family 21 protein [Bipolaris maydis ATCC 48331]	PF03370.13	CBM_21	Carbohydrate/starch-binding module (family 21)	ENOG4111FT1	protein phosphatase 1, regulatory subunit	GO:0005977|glycogen metabolic process;GO:0005979|regulation of glycogen biosynthetic process;GO:0005981|regulation of glycogen catabolic process	GO:0019899|enzyme binding;GO:0004722|protein serine/threonine phosphatase activityGO:0005515|protein binding;GO:2001070|starch binding	GO:0042587|glycogen granule;GO:0043231|intracellular membrane-bounded organelle	K07189|PPP1R3; protein phosphatase 1 regulatory subunit 3A/B/C/D/E	map04910|Insulin signaling pathway;map04931|Insulin resistance
evm.model.contig5.764	Protein.evm.model.contig5.764::evm.model.contig5.764	2007809-2009375[-]	gi|189203918|ref|XM_001938260.1|	1112	E:0	Pyrenophora tritici-repentis Pt-1C-BFP NEDD8-activating enzyme E1 catalytic subunit, mRNA	XP_018386957.1	881	E:0	hypothetical protein CC77DRAFT_960679 [Alternaria alternata]	PF00899.21	ThiF	ThiF family	COG0476	small protein activating enzyme activity	GO:0032446|protein modification by small protein conjugation;GO:0045116|protein neddylationGO:0045116|protein neddylation	GO:0005524|ATP binding;GO:0019781|NEDD8 activating enzyme activityGO:0008641|ubiquitin-like modifier activating enzyme activity;GO:0019781|NEDD8 activating enzyme activity	GO:0005737|cytoplasm;GO:0005634|nucleus	K10686|UBE1C, UBA3; ubiquitin-activating enzyme E1 C [EC:6.2.1.45]	map04120|Ubiquitin mediated proteolysis
evm.model.contig5.444	Protein.evm.model.contig5.444::evm.model.contig5.444	1170904-1172697[+]	gi|628195896|ref|XM_007711503.1|	1234	E:0	Bipolaris zeicola 26-R-13 hypothetical protein partial mRNA	XP_018381525.1	1050	E:0	Methylmalonate-semialdehyde dehydrogenase [Alternaria alternata]	PF00171.22	Aldedh	Aldehyde dehydrogenase family	ENOG410XNP1	Dehydrogenase	GO:0019859|thymine metabolic process;GO:0006573|valine metabolic processGO:0055114|oxidation-reduction process	GO:0018478|malonate-semialdehyde dehydrogenase (acetylating) activity;GO:0004491|methylmalonate-semialdehyde dehydrogenase (acylating) activityGO:0016491|oxidoreductase activity	GO:0005739|mitochondrion	K00140|mmsA, iolA, ALDH6A1; malonate-semialdehyde dehydrogenase (acetylating) / methylmalonate-semialdehyde dehydrogenase [EC:1.2.1.18 1.2.1.27]	map00562|Inositol phosphate metabolism;map00280|Valine, leucine and isoleucine degradation;map01200|Carbon metabolism;map00640|Propanoate metabolism;map00410|beta-Alanine metabolism;map01100|Metabolic pathways
evm.model.contig5.106	Protein.evm.model.contig5.106::evm.model.contig5.106	310788-313789[+]	gi|953432508|ref|XM_014702840.1|	267	E:4e-68	Bipolaris victoriae FI3 hypothetical protein partial mRNA	RAR02796.1	870	E:0	FAD/NAD(P)-binding domain-containing protein [Stemphylium lycopersici]	PF00743.19	FMO-like	Flavin-binding monooxygenase-like	COG2072	Monooxygenase	GO:0055114|oxidation-reduction process	GO:0050660|flavin adenine dinucleotide binding;GO:0004499|N,N-dimethylaniline monooxygenase activity;GO:0050661|NADP bindingGO:0004499|N,N-dimethylaniline monooxygenase activity;GO:0050660|flavin adenine dinucleotide binding;GO:0050661|NADP binding;GO:0016491|oxidoreductase activity	GO:0005615|extracellular space	K00485|FMO; dimethylaniline monooxygenase (N-oxide forming) [EC:1.14.13.8]	map00982|Drug metabolism - cytochrome P450;map01120|Microbial metabolism in diverse environments
evm.model.contig6.374	Protein.evm.model.contig6.374::evm.model.contig6.374	1000364-1002531[-]	gi|189195277|ref|XM_001933942.1|	701	E:0	Pyrenophora tritici-repentis Pt-1C-BFP long-chain-fatty-acid-CoA ligase 1, mRNA	XP_018382848.1	1345	E:0	long-chain-fatty-acid-CoA ligase 1 [Alternaria alternata]	PF00501.28	AMP-binding	AMP-binding enzyme	COG1022	Amp-dependent synthetase and ligase	GO:0006631|fatty acid metabolic process;GO:0010193|response to ozone;GO:0009651|response to salt stress	GO:0003996|acyl-CoA ligase activity;GO:0005524|ATP binding;GO:0102391|decanoate-CoA ligase activity;GO:0004467|long-chain fatty acid-CoA ligase activityGO:0003824|catalytic activity	GO:0005777|peroxisome;GO:0009536|plastid	K01897|ACSL, fadD; long-chain acyl-CoA synthetase [EC:6.2.1.3]	map01212|Fatty acid metabolism;map04146|Peroxisome;map00071|Fatty acid degradation;map00061|Fatty acid biosynthesis;map03320|PPAR signaling pathway;map01100|Metabolic pathways;map04920|Adipocytokine signaling pathway
evm.model.contig2.1165	Protein.evm.model.contig2.1165::evm.model.contig2.1165	2978807-2979905[-]	gi|628086701|ref|XM_007707011.1|	396	E:2e-107	Cochliobolus sativus ND90Pr hypothetical protein partial mRNA	XP_018385798.1	390	E:6e-129	hypothetical protein CC77DRAFT_1040935 [Alternaria alternata]	PF04909.14	Amidohydro_2	Amidohydrolase	COG2159	amidohydrolase 2	GO:1904985|negative regulation of quinolinate biosynthetic process;GO:0051259|protein complex oligomerization;GO:0019748|secondary metabolic process	GO:0001760|aminocarboxymuconate-semialdehyde decarboxylase activity;GO:0016787|hydrolase activity;GO:0008270|zinc ion bindingGO:0016787|hydrolase activity	GO:0005737|cytoplasm;GO:0005829|cytosol	K03392|ACMSD; aminocarboxymuconate-semialdehyde decarboxylase [EC:4.1.1.45]	map01100|Metabolic pathways;map00380|Tryptophan metabolism
evm.model.contig7.260	Protein.evm.model.contig7.260::evm.model.contig7.260	678075-678729[-]	gi|189190433|ref|XM_001931521.1|	660	E:0	Pyrenophora tritici-repentis Pt-1C-BFP cofilin, mRNA	XP_018385157.1	263	E:1e-87	cofilin [Alternaria alternata]	PF00241.20	Cofilin_ADF	Cofilin/tropomyosin-type actin-binding protein	ENOG41122P5	actin-depolymerizing factor	GO:0030042|actin filament depolymerization;GO:0007049|cell cycle;GO:0051301|cell division	GO:0003779|actin bindingGO:0003779|actin binding	GO:0015629|actin cytoskeleton;GO:0005737|cytoplasm;GO:0016363|nuclear matrixGO:0005622|intracellular	K05765|CFL; cofilin	map05133|Pertussis;map04360|Axon guidance;map04666|Fc gamma R-mediated phagocytosis;map04810|Regulation of actin cytoskeleton
evm.model.contig1.1223	Protein.evm.model.contig1.1223::evm.model.contig1.1223	2987449-2989084[-]	gi|927396504|ref|XM_014088623.1|	71.3	E:2e-09	Trichoderma atroviride IMI 206040 hypothetical protein mRNA	XP_018389207.1	777	E:0	glutamyl-tRNA amidotransferas-like protein [Alternaria alternata]	PF01425.21	Amidase	Amidase	COG0154	Allows the formation of correctly charged Gln-tRNA(Gln) through the transamidation of misacylated Glu-tRNA(Gln) in organisms which lack glutaminyl-tRNA synthetase. The reaction takes place in the presence of glutamine and ATP through an activated gamma-phospho-Glu-tRNA(Gln) (By similarity)	GO:0070681|glutaminyl-tRNAGln biosynthesis via transamidation;GO:0032543|mitochondrial translation	GO:0004040|amidase activity;GO:0005524|ATP binding;GO:0050567|glutaminyl-tRNA synthase (glutamine-hydrolyzing) activity	GO:0030956|glutamyl-tRNA(Gln) amidotransferase complex;GO:0005739|mitochondrion	K02433|gatA, QRSL1; aspartyl-tRNA(Asn)/glutamyl-tRNA(Gln) amidotransferase subunit A [EC:6.3.5.6 6.3.5.7]	map01100|Metabolic pathways;map00970|Aminoacyl-tRNA biosynthesis
evm.model.contig2.832	Protein.evm.model.contig2.832::evm.model.contig2.832	2126808-2127598[+]	gi|189209783|ref|XM_001941189.1|	497	E:4e-138	Pyrenophora tritici-repentis Pt-1C-BFP serine/threonine protein phosphatase 2A, mRNA	RII21852.1	444	E:3e-150	hypothetical protein CUC08_Gglean001021 [Alternaria sp. MG1]	PF01603.20	B56	Protein phosphatase 2A regulatory B subunit (B56 family)	ENOG410XQJW	Protein phosphatase 2, regulatory subunit B	GO:0007165|signal transductionGO:0007165|signal transduction	GO:0019888|protein phosphatase regulator activityGO:0019888|protein phosphatase regulator activity	GO:0005634|nucleus;GO:0000159|protein phosphatase type 2A complexGO:0000159|protein phosphatase type 2A complex	K11584|PPP2R5; serine/threonine-protein phosphatase 2A regulatory subunit B'	map04071|Sphingolipid signaling pathway;map04152|AMPK signaling pathway;map04151|PI3K-Akt signaling pathway;map04113|Meiosis - yeast;map04261|Adrenergic signaling in cardiomyocytes;map04114|Oocyte meiosis;map04728|Dopaminergic synapse;map03015|mRNA surveillance pathway
evm.model.contig9.413	Protein.evm.model.contig9.413::evm.model.contig9.413	1066947-1067734[+]	gi|396499350|ref|XM_003845405.1|	403	E:1e-109	Leptosphaeria maculans JN3 similar to glycoside hydrolase family 61 protein (LEMA_P007610.1) mRNA, complete cds	XP_018382358.1	428	E:6e-150	glycoside hydrolase [Alternaria alternata]	PF03443.14	Glyco_hydro_61	Glycosyl hydrolase family 61	ENOG410YBW9	endo-glucanase	GO:0030245|cellulose catabolic process	GO:0030248|cellulose binding;GO:0016798|hydrolase activity, acting on glycosyl bonds;GO:0016491|oxidoreductase activity	GO:0005576|extracellular region	K19356|EGLD; cellulase [EC:3.2.1.4]	map01100|Metabolic pathways;map00500|Starch and sucrose metabolism
evm.model.contig1.397	Protein.evm.model.contig1.397::evm.model.contig1.397	976821-977421[+]	gi|189194362|ref|XM_001933485.1|	470	E:6e-130	Pyrenophora tritici-repentis Pt-1C-BFP conserved hypothetical protein, mRNA	XP_018390182.1	240	E:5e-79	hypothetical protein CC77DRAFT_1057954 [Alternaria alternata]	PF06212.12	GRIM-19	GRIM-19 protein	ENOG4111KIB	NADH dehydrogenase (Ubiquinone) 1 alpha subcomplex	GO:0097190|apoptotic signaling pathway;GO:0035458|cellular response to interferon-beta;GO:0071300|cellular response to retinoic acid;GO:0097191|extrinsic apoptotic signaling pathway;GO:0032981|mitochondrial respiratory chain complex I assembly;GO:0030308|negative regulation of cell growth;GO:2001243|negative regulation of intrinsic apoptotic signaling pathway;GO:0045892|negative regulation of tra…	GO:0008137|NADH dehydrogenase (ubiquinone) activity	GO:0005737|cytoplasm;GO:0016021|integral component of membrane;GO:0005746|mitochondrial respirasome;GO:0005747|mitochondrial respiratory chain complex I;GO:0005739|mitochondrion;GO:0005654|nucleoplasm	K11353|NDUFA13; NADH dehydrogenase (ubiquinone) 1 alpha subcomplex subunit 13	map05012|Parkinson's disease;map04932|Non-alcoholic fatty liver disease (NAFLD);map05016|Huntington's disease;map05010|Alzheimer's disease;map01100|Metabolic pathways;map00190|Oxidative phosphorylation
evm.model.contig3.50	Protein.evm.model.contig3.50::evm.model.contig3.50	137518-142243[-]	gi|627830224|ref|XM_007688365.1|	411	E:3e-111	Bipolaris oryzae ATCC 44560 hypothetical protein partial mRNA	OWY45653.1	1377	E:0	trichothecene 3-o-acetyltransferase [Alternaria alternata]	PF02458.15	Transferase	Transferase family	COG1960	acyl-CoA dehydrogenase	GO:0006635|fatty acid beta-oxidation;GO:0033540|fatty acid beta-oxidation using acyl-CoA oxidase;GO:0009695|jasmonic acid biosynthetic process;GO:0055088|lipid homeostasis;GO:0001676|long-chain fatty acid metabolic process;GO:0046686|response to cadmium ion;GO:0009620|response to fungus;GO:0009611|response to woundingGO:0006635|fatty acid beta-oxidation	GO:0003997|acyl-CoA oxidase activity;GO:0071949|FAD binding;GO:0005504|fatty acid binding;GO:0050660|flavin adenine dinucleotide bindingGO:0016747|transferase activity, transferring acyl groups other than amino-acyl groups;GO:0003997|acyl-CoA oxidase activity	GO:0005829|cytosol;GO:0005777|peroxisome;GO:0009506|plasmodesmaGO:0005777|peroxisome	K00232|E1.3.3.6, ACOX1, ACOX3; acyl-CoA oxidase [EC:1.3.3.6]	map01212|Fatty acid metabolism;map04146|Peroxisome;map00071|Fatty acid degradation;map00592|alpha-Linolenic acid metabolism;map03320|PPAR signaling pathway;map01110|Biosynthesis of secondary metabolites;map04024|cAMP signaling pathway;map01100|Metabolic pathways;map01040|Biosynthesis of unsaturated fatty acids
evm.model.contig3.1139	Protein.evm.model.contig3.1139::evm.model.contig3.1139	2980867-2984239[+]	gi|928507684|ref|XM_014217171.1|	418	E:1e-113	Bipolaris maydis ATCC 48331 hypothetical protein partial mRNA	RYN27028.1	1425	E:0	hypothetical protein AA0115_g6536 [Alternaria tenuissima]	PF12796.7	Ank_2	Ankyrin repeats (3 copies)	COG0666	Ankyrin Repeat	GO:0030036|actin cytoskeleton organization;GO:0031589|cell-substrate adhesion;GO:0006935|chemotaxis;GO:0043327|chemotaxis to cAMP;GO:0031154|culmination involved in sorocarp development;GO:0032012|regulation of ARF protein signal transduction	GO:0005086|ARF guanyl-nucleotide exchange factor activity	GO:0005829|cytosol;GO:0005764|lysosome	K18441|CYTH; cytohesin	map04144|Endocytosis
evm.model.contig3.773	Protein.evm.model.contig3.773::evm.model.contig3.773	2009905-2010858[+]	gi|953423916|ref|XM_014698544.1|	466	E:1e-128	Bipolaris victoriae FI3 hypothetical protein partial mRNA	OWY52716.1	369	E:1e-125	phosphatidylinositol glycan class L [Alternaria alternata]	PF02585.17	PIG-L	GlcNAc-PI de-N-acetylase	COG2120	lmbE family	GO:0006506|GPI anchor biosynthetic process	GO:0000225|N-acetylglucosaminylphosphatidylinositol deacetylase activity	GO:0005789|endoplasmic reticulum membrane;GO:0016021|integral component of membrane	K03434|PIGL; N-acetylglucosaminylphosphatidylinositol deacetylase [EC:3.5.1.89]	map00563|Glycosylphosphatidylinositol(GPI)-anchor biosynthesis;map01100|Metabolic pathways
evm.model.contig9.598	Protein.evm.model.contig9.598::evm.model.contig9.598	1593100-1593467[+]	gi|953417014|ref|XM_014695093.1|	431	E:2e-118	Bipolaris victoriae FI3 hypothetical protein partial mRNA	RII17982.1	73.9	E:8e-15	hypothetical protein CUC08_Gglean002070 [Alternaria sp. MG1]	PF01280.20	Ribosomal_L19e	Ribosomal protein L19e	COG2147	ribosomal protein L19	GO:0006412|translationGO:0006412|translation	GO:0003729|mRNA binding;GO:0003735|structural constituent of ribosomeGO:0003735|structural constituent of ribosome	GO:0005829|cytosol;GO:0022625|cytosolic large ribosomal subunit;GO:0005886|plasma membraneGO:0005622|intracellular;GO:0005840|ribosome	K02885|RP-L19e, RPL19; large subunit ribosomal protein L19e	map03010|Ribosome
evm.model.contig5.343	Protein.evm.model.contig5.343::evm.model.contig5.343	917796-918984[+]	gi|628073630|ref|XM_007703279.1|	357	E:1e-95	Cochliobolus sativus ND90Pr hypothetical protein partial mRNA	OWY43699.1	260	E:8e-127	PWI-like protein [Alternaria alternata]	PF01480.17	PWI	PWI domain	ENOG4111IMU	serine arginine repetitive matrix	GO:0000398|mRNA splicing, via spliceosome;GO:0000375|RNA splicing, via transesterification reactionsGO:0006397|mRNA processing	GO:0003677|DNA binding	GO:0016363|nuclear matrix;GO:0016607|nuclear speck;GO:0005681|spliceosomal complex	K13171|SRRM1, SRM160; serine/arginine repetitive matrix protein 1	map03015|mRNA surveillance pathway;map03013|RNA transport
evm.model.contig9.429	Protein.evm.model.contig9.429::evm.model.contig9.429	1106195-1107667[+]	gi|928518711|ref|XM_014222678.1|	1002	E:0	Bipolaris maydis ATCC 48331 hypothetical protein mRNA	OWY51507.1	781	E:0	Adaptor protein complex beta subunit [Alternaria alternata]	PF01602.20	Adaptin_N	Adaptin N terminal region	COG5096	The coatomer is a cytosolic protein complex that binds to dilysine motifs and reversibly associates with Golgi non- clathrin-coated vesicles, which further mediate biosynthetic protein transport from the ER, via the Golgi up to the trans Golgi network. Coatomer complex is required for budding from Golgi membranes, and is essential for the retrograde Golgi-to-ER transport of dilysine-tagged protei…	GO:0006886|intracellular protein transport;GO:0016192|vesicle-mediated transportGO:0006886|intracellular protein transport;GO:0016192|vesicle-mediated transport	GO:0030276|clathrin binding	GO:0030131|clathrin adaptor complex;GO:0030665|clathrin-coated vesicle membrane;GO:0005829|cytosol;GO:0005794|Golgi apparatus;GO:0005886|plasma membrane;GO:0009506|plasmodesmaGO:0030117|membrane coat	K12392|AP1B1; AP-1 complex subunit beta-1	map04142|Lysosome
evm.model.contig1.2158	Protein.evm.model.contig1.2158::evm.model.contig1.2158	5447174-5448202[-]	gi|928524779|ref|XM_014225712.1|	726	E:0	Bipolaris maydis ATCC 48331 hypothetical protein partial mRNA	OWY42988.1	603	E:0	aquaporin [Alternaria alternata]	PF00230.20	MIP	Major intrinsic protein	COG0580	Channel that permits osmotically driven movement of water in both directions. It is involved in the osmoregulation and in the maintenance of cell turgor during volume expansion in rapidly growing cells. It mediates rapid entry or exit of water in response to abrupt changes in osmolarity (By similarity)	GO:0071456|cellular response to hypoxia;GO:0090650|cellular response to oxygen-glucose deprivation;GO:0015793|glycerol transport;GO:0042476|odontogenesis;GO:0002684|positive regulation of immune system process;GO:0070295|renal water absorption;GO:0032526|response to retinoic acid;GO:0015840|urea transport;GO:0006833|water transportGO:0055085|transmembrane transport	GO:0015254|glycerol channel activity;GO:0015204|urea transmembrane transporter activity;GO:0015250|water channel activityGO:0015267|channel activity	GO:0016323|basolateral plasma membrane;GO:0005911|cell-cell junction;GO:0005737|cytoplasm;GO:0005887|integral component of plasma membrane;GO:0005634|nucleus;GO:0005886|plasma membraneGO:0016020|membrane	K09876|AQP3; aquaporin-3	map04962|Vasopressin-regulated water reabsorption
evm.model.contig1.2444	Protein.evm.model.contig1.2444::evm.model.contig1.2444	6242595-6244588[+]	gi|356578609|gb|HQ693484.1|	2183	E:0	Alternaria alternata strain CBS 109803 heat shock protein 70 (hsp70) gene, complete cds	XP_028510991.1	863	E:0	Heat shock protein 2 [Alternaria arborescens]	PF00012.20	HSP70	Hsp70 protein	COG0443	Heat shock protein	GO:0006457|protein folding;GO:0006515|protein quality control for misfolded or incompletely synthesized proteins;GO:0006616|SRP-dependent cotranslational protein targeting to membrane, translocationGO:0000902|cell morphogenesis	GO:0005524|ATP binding;GO:0016887|ATPase activity;GO:0051082|unfolded protein binding	GO:0005829|cytosol	K03283|HSPA1_8; heat shock 70kDa protein 1/8	map04915|Estrogen signaling pathway;map04141|Protein processing in endoplasmic reticulum;map04144|Endocytosis;map03040|Spliceosome;map04010|MAPK signaling pathway;map05134|Legionellosis;map05164|Influenza A;map05162|Measles;map05145|Toxoplasmosis;map04612|Antigen processing and presentation;map05169|Epstein-Barr virus infection
evm.model.contig6.801	Protein.evm.model.contig6.801::evm.model.contig6.801	2102382-2103087[-]	gi|189198078|ref|XM_001935342.1|	207	E:7e-51	Pyrenophora tritici-repentis Pt-1C-BFP endoglucanase II, mRNA	RYN17673.1	306	E:3e-103	hypothetical protein AA0115_g11722 [Alternaria tenuissima]	PF03443.14	Glyco_hydro_61	Glycosyl hydrolase family 61	ENOG410YBW9	endo-glucanase	GO:0030245|cellulose catabolic process	GO:0030248|cellulose binding;GO:0016798|hydrolase activity, acting on glycosyl bonds;GO:0016491|oxidoreductase activity	GO:0005576|extracellular region	K19356|EGLD; cellulase [EC:3.2.1.4]	map01100|Metabolic pathways;map00500|Starch and sucrose metabolism
evm.model.contig9.514	Protein.evm.model.contig9.514::evm.model.contig9.514	1391538-1393116[+]	gi|953428886|ref|XM_014701029.1|	429	E:2e-117	Bipolaris victoriae FI3 hypothetical protein partial mRNA	RYN37427.1	583	E:0	NAD(P) transhydrogenase [Alternaria tenuissima]	PF02233.16	PNTB	NAD(P) transhydrogenase beta subunit	COG1282	The transhydrogenation between NADH and NADP is coupled to respiration and ATP hydrolysis and functions as a proton pump across the membrane (By similarity)	.	GO:0008750|NAD(P)+ transhydrogenase (AB-specific) activity;GO:0050661|NADP binding	GO:0016021|integral component of membrane;GO:0005886|plasma membrane	K00325|pntB; NAD(P) transhydrogenase subunit beta [EC:1.6.1.2]	map00760|Nicotinate and nicotinamide metabolism;map01100|Metabolic pathways
evm.model.contig3.855	Protein.evm.model.contig3.855::evm.model.contig3.855	2244381-2246167[+]	gi|628070052|ref|XM_007701490.1|	392	E:5e-106	Cochliobolus sativus ND90Pr hypothetical protein partial mRNA	RYN16187.1	781	E:0	hypothetical protein AA0115_g12517 [Alternaria tenuissima]	PF00752.17	XPG_N	XPG N-terminal domain	COG0258	Structure-specific nuclease with 5'-flap endonuclease and 5'-3' exonuclease activities involved in DNA replication and repair. During DNA replication, cleaves the 5'-overhanging flap structure that is generated by displacement synthesis when DNA polymerase encounters the 5'-end of a downstream Okazaki fragment. It enters the flap from the 5'-end and then tracks to cleave the flap base, leaving a …	GO:0000724|double-strand break repair via homologous recombination;GO:0090267|positive regulation of mitotic cell cycle spindle assembly checkpoint;GO:0010824|regulation of centrosome duplication;GO:0031297|replication fork processing;GO:0071140|resolution of mitotic recombination intermediates;GO:0071139|resolution of recombination intermediatesGO:0006281|DNA repair	GO:0035312|5'-3' exodeoxyribonuclease activity;GO:0017108|5'-flap endonuclease activity;GO:0008821|crossover junction endodeoxyribonuclease activity;GO:0048256|flap endonuclease activity;GO:0000400|four-way junction DNA binding;GO:0000287|magnesium ion binding;GO:0042803|protein homodimerization activityGO:0004518|nuclease activity	GO:0005813|centrosome;GO:0005654|nucleoplasm	K15338|GEN1, GEN; flap endonuclease GEN [EC:3.1.-.-]	.
evm.model.contig5.245	Protein.evm.model.contig5.245::evm.model.contig5.245	693745-694830[+]	gi|702066539|emb|FO905619.1|	228	E:9e-57	Leptosphaeria biglobosa brassicae b35_scaffold00045 complete sequence	RYN46214.1	603	E:0	hypothetical protein AA0114_g8466 [Alternaria tenuissima]	PF03446.15	NAD_binding_2	NAD binding domain of 6-phosphogluconate dehydrogenase	COG2084	Dehydrogenase	GO:0006574|valine catabolic process	GO:0008442|3-hydroxyisobutyrate dehydrogenase activity;GO:0051287|NAD binding;GO:0050661|NADP bindingGO:0050661|NADP binding;GO:0051287|NAD binding	.	K00020|E1.1.1.31, mmsB; 3-hydroxyisobutyrate dehydrogenase [EC:1.1.1.31]	map00280|Valine, leucine and isoleucine degradation;map01100|Metabolic pathways
evm.model.contig4.630	Protein.evm.model.contig4.630::evm.model.contig4.630	1745806-1746100[+]	gi|636595640|ref|XM_008030968.1|	239	E:9e-61	Setosphaeria turcica Et28A hypothetical protein partial mRNA	XP_018391544.1	161	E:1e-49	hypothetical protein CC77DRAFT_924279 [Alternaria alternata]	PF02953.15	zf-Tim10_DDP	Tim10/DDP family zinc finger	ENOG41124YI	Mitochondrial intermembrane chaperone that participates in the import and insertion of some multi-pass transmembrane proteins into the mitochondrial inner membrane. Also required for the transfer of beta-barrel precursors from the TOM complex to the sorting and assembly machinery (SAM complex) of the outer membrane. Acts as a chaperone-like protein that protects the hydrophobic precursors from ag…	GO:0072321|chaperone-mediated protein transport	GO:0046872|metal ion binding	GO:0005743|mitochondrial inner membrane;GO:0005758|mitochondrial intermembrane space	K17781|TIM13; mitochondrial import inner membrane translocase subunit TIM13	.
evm.model.contig2.1729	Protein.evm.model.contig2.1729::evm.model.contig2.1729	4416500-4418114[-]	gi|636581730|ref|XM_008024013.1|	1703	E:0	Setosphaeria turcica Et28A hypothetical protein partial mRNA	RII16702.1	684	E:0	hypothetical protein CUC08_Gglean003145 [Alternaria sp. MG1]	PF13893.6	RRM_5	RNA recognition motif. (a.k.a. RRM, RBD, or RNP domain)	ENOG410XQ8U	TIA1 cytotoxic granule-associated RNA binding	GO:0006397|mRNA processing	GO:0003729|mRNA bindingGO:0003676|nucleic acid binding	GO:0005634|nucleus	K13201|TIA1, TIAL1; nucleolysin TIA-1/TIAR	.
evm.model.contig1.357	Protein.evm.model.contig1.357::evm.model.contig1.357	881076-882743[-]	gi|189204615|ref|XM_001938608.1|	416	E:2e-113	Pyrenophora tritici-repentis Pt-1C-BFP streptomycin biosynthesis protein StrI, mRNA	RII10979.1	568	E:0	hypothetical protein CUC08_Gglean006980 [Alternaria sp. MG1]	PF01408.22	GFO_IDH_MocA	Oxidoreductase family, NAD-binding Rossmann fold	COG0673	oxidoreductase	GO:0019310|inositol catabolic process	GO:0050112|inositol 2-dehydrogenase activityGO:0016491|oxidoreductase activity	.	K00010|iolG; myo-inositol 2-dehydrogenase / D-chiro-inositol 1-dehydrogenase [EC:1.1.1.18 1.1.1.369]	map00562|Inositol phosphate metabolism;map01100|Metabolic pathways;map01120|Microbial metabolism in diverse environments;map00521|Streptomycin biosynthesis;map01130|Biosynthesis of antibiotics
evm.model.contig1.1564	Protein.evm.model.contig1.1564::evm.model.contig1.1564	3816655-3818229[+]	gi|189204305|ref|XM_001938453.1|	490	E:1e-135	Pyrenophora tritici-repentis Pt-1C-BFP glucosamine-6-phosphate deaminase, mRNA	RYN69455.1	569	E:0	Glucosamine-6-phosphate isomerase 1 [Alternaria tenuissima]	PF01182.20	Glucosamine_iso	Glucosamine-6-phosphate isomerases/6-phosphogluconolactonase	COG0363	Catalyzes the reversible isomerization-deamination of glucosamine 6-phosphate (GlcN6P) to form fructose 6-phosphate (Fru6P) and ammonium ion (By similarity)	GO:0005975|carbohydrate metabolic process;GO:0006044|N-acetylglucosamine metabolic process;GO:0019262|N-acetylneuraminate catabolic processGO:0005975|carbohydrate metabolic process	GO:0004342|glucosamine-6-phosphate deaminase activity	.	K02564|nagB, GNPDA; glucosamine-6-phosphate deaminase [EC:3.5.99.6]	map01100|Metabolic pathways;map00520|Amino sugar and nucleotide sugar metabolism
evm.model.contig6.141	Protein.evm.model.contig6.141::evm.model.contig6.141	380212-380578[+]	gi|396478051|ref|XM_003840393.1|	228	E:3e-57	Leptosphaeria maculans JN3 hypothetical protein (LEMA_P100930.1) mRNA, complete cds	XP_018383089.1	214	E:3e-65	TIP49-domain-containing protein [Alternaria alternata]	PF17856.1	TIP49_C	TIP49 AAA-lid domain	COG1224	ruvB-like	GO:0006325|chromatin organization;GO:0006281|DNA repair;GO:0006364|rRNA processing	GO:0043139|5'-3' DNA helicase activity;GO:0005524|ATP binding	GO:0031011|Ino80 complex;GO:0035267|NuA4 histone acetyltransferase complex;GO:0097255|R2TP complex	K11338|RUVBL2, RVB2, INO80J; RuvB-like protein 2 [EC:3.6.4.12]	.
evm.model.contig2.178	Protein.evm.model.contig2.178::evm.model.contig2.178	566745-568122[-]	gi|599373686|ref|XM_007395597.1|	82.4	E:1e-12	Phanerochaete carnosa HHB-10118-sp hypothetical protein (PHACADRAFT_255882), mRNA	XP_018384394.1	754	E:0	release factor [Alternaria alternata]	PF03462.18	PCRF	PCRF domain	COG0216	Peptide chain release factor 1 directs the termination of translation in response to the peptide chain termination codons UAG and UAA (By similarity)	GO:0070126|mitochondrial translational terminationGO:0006415|translational termination	GO:0003747|translation release factor activityGO:0003747|translation release factor activity	GO:0005743|mitochondrial inner membrane	K02835|prfA, MTRF1, MRF1; peptide chain release factor 1	.
evm.model.contig5.263	Protein.evm.model.contig5.263::evm.model.contig5.263	734036-735105[-]	gi|189203800|ref|XM_001938201.1|	551	E:5e-154	Pyrenophora tritici-repentis Pt-1C-BFP pirin, mRNA	RYN46374.1	594	E:0	hypothetical protein AA0114_g8445 [Alternaria tenuissima]	PF02678.16	Pirin	Pirin	COG1741	pirin domain protein	GO:0007586|digestion;GO:0030224|monocyte differentiation;GO:0006366|transcription by RNA polymerase II	GO:0046872|metal ion binding;GO:0008127|quercetin 2,3-dioxygenase activity;GO:0003712|transcription coregulator activity	GO:0005737|cytoplasm;GO:0005829|cytosol;GO:0005654|nucleoplasm;GO:0005634|nucleus	K06911|K06911; uncharacterized protein	.
evm.model.contig2.2021	Protein.evm.model.contig2.2021::evm.model.contig2.2021	5151750-5152187[+]	gi|953435576|ref|XM_014704374.1|	163	E:1e-37	Bipolaris victoriae FI3 hypothetical protein partial mRNA	RII16551.1	241	E:3e-77	hypothetical protein CUC08_Gglean002989 [Alternaria sp. MG1]	PF00176.23	SNF2_N	SNF2 family N-terminal domain	COG0553	helicase	GO:0006325|chromatin organization;GO:0016567|protein ubiquitination	GO:0005524|ATP binding;GO:0003677|DNA binding;GO:0004386|helicase activity;GO:0016740|transferase activity;GO:0008270|zinc ion bindingGO:0005524|ATP binding	GO:0005737|cytoplasm;GO:0005730|nucleolus;GO:0005654|nucleoplasm	K15711|SMARCA3, HLTF; SWI/SNF-related matrix-associated actin-dependent regulator of chromatin subfamily A3 [EC:3.6.4.- 2.3.2.27]	.
evm.model.contig7.73	Protein.evm.model.contig7.73::evm.model.contig7.73	219968-222713[-]	gi|189208277|ref|XM_001940437.1|	287	E:3e-74	Pyrenophora tritici-repentis Pt-1C-BFP ankyrin repeat domain containing protein, mRNA	RYN58291.1	897	E:0	hypothetical protein AA0114_g1976 [Alternaria tenuissima]	PF12796.7	Ank_2	Ankyrin repeats (3 copies)	COG0666	Ankyrin Repeat	GO:0045087|innate immune response	GO:0003723|RNA bindingGO:0005515|protein binding	GO:0005737|cytoplasm	K16726|ANKRD17, MASK; ankyrin repeat domain-containing protein 17	.
evm.model.contig4.228	Protein.evm.model.contig4.228::evm.model.contig4.228	686359-688045[+]	gi|189202015|ref|XM_001937309.1|	918	E:0	Pyrenophora tritici-repentis Pt-1C-BFP 26S proteasome non-ATPase regulatory subunit 12, mRNA	XP_018391965.1	865	E:0	PCI-domain-containing protein [Alternaria alternata]	PF01399.27	PCI	PCI domain	COG5071	26S proteasome non-ATPase regulatory subunit	GO:0043161|proteasome-mediated ubiquitin-dependent protein catabolic process	.	GO:0005737|cytoplasm;GO:0031595|nuclear proteasome complex;GO:0022624|proteasome accessory complex;GO:0000502|proteasome complex;GO:0005838|proteasome regulatory particle;GO:0008541|proteasome regulatory particle, lid subcomplex	K03035|PSMD12, RPN5; 26S proteasome regulatory subunit N5	map03050|Proteasome;map05169|Epstein-Barr virus infection
evm.model.contig1.1696	Protein.evm.model.contig1.1696::evm.model.contig1.1696	4231792-4232515[-]	gi|189208795|ref|XM_001940696.1|	178	E:7e-42	Pyrenophora tritici-repentis Pt-1C-BFP ubiquitin carboxyl-terminal hydrolase isozyme L4, mRNA	XP_018383915.1	467	E:2e-165	cysteine proteinase [Alternaria alternata]	PF01088.21	Peptidase_C12	Ubiquitin carboxyl-terminal hydrolase, family 1	ENOG4111HNA	ubiquitin carboxyl-terminal	GO:0043687|post-translational protein modification;GO:0030163|protein catabolic process;GO:0016579|protein deubiquitination;GO:0016567|protein ubiquitination;GO:0006511|ubiquitin-dependent protein catabolic processGO:0006511|ubiquitin-dependent protein catabolic process	GO:0019784|NEDD8-specific protease activity;GO:0008233|peptidase activity;GO:0004843|thiol-dependent ubiquitin-specific protease activity;GO:0036459|thiol-dependent ubiquitinyl hydrolase activity;GO:0043130|ubiquitin bindingGO:0004843|thiol-dependent ubiquitin-specific protease activity	GO:0005737|cytoplasm;GO:0005829|cytosol;GO:0005634|nucleusGO:0005622|intracellular	K05609|UCHL3, YUH1; ubiquitin carboxyl-terminal hydrolase L3 [EC:3.4.19.12]	.
evm.model.contig7.840	Protein.evm.model.contig7.840::evm.model.contig7.840	2123990-2125251[-]	gi|702066543|emb|FO905623.1|	322	E:4e-85	Leptosphaeria biglobosa brassicae b35_scaffold00041 complete sequence	XP_018386401.1	542	E:0	glycoside hydrolase [Alternaria alternata]	PF00331.20	Glyco_hydro_10	Glycosyl hydrolase family 10	COG3693	hydrolase family 10	GO:0009405|pathogenesis;GO:0045493|xylan catabolic processGO:0005975|carbohydrate metabolic process	GO:0031176|endo-1,4-beta-xylanase activityGO:0004553|hydrolase activity, hydrolyzing O-glycosyl compounds	GO:0005576|extracellular region	K01181|E3.2.1.8, xynA; endo-1,4-beta-xylanase [EC:3.2.1.8]	.
evm.model.contig6.605	Protein.evm.model.contig6.605::evm.model.contig6.605	1586207-1591244[+]	gi|396488361|ref|XM_003842812.1|	630	E:3e-177	Leptosphaeria maculans JN3 hypothetical protein (LEMA_P086200.1) mRNA, complete cds	XP_001935298.1	2113	E:0	UDP-N-acetylglucosaminyltransferase [Pyrenophora tritici-repentis Pt-1C-BFP]	PF13181.6	TPR_8	Tetratricopeptide repeat	COG3914	protein N-acetylglucosaminyltransferase activity	GO:0007275|multicellular organism development;GO:0006493|protein O-linked glycosylation	GO:0016757|transferase activity, transferring glycosyl groupsGO:0005515|protein binding	.	K09667|OGT; protein O-GlcNAc transferase [EC:2.4.1.255]	map04931|Insulin resistance;map00514|Other types of O-glycan biosynthesis
evm.model.contig5.93	Protein.evm.model.contig5.93::evm.model.contig5.93	273673-274821[+]	gi|628085639|ref|XM_007706480.1|	665	E:0	Cochliobolus sativus ND90Pr hypothetical protein mRNA	XP_018380740.1	596	E:0	NAD(P)-binding protein [Alternaria alternata]	PF00107.26	ADH_zinc_N	Zinc-binding dehydrogenase	COG0604	alcohol dehydrogenase	GO:0055114|oxidation-reduction process	GO:0016491|oxidoreductase activity	.	K00344|qor, CRYZ; NADPH2:quinone reductase [EC:1.6.5.5]	map00980|Metabolism of xenobiotics by cytochrome P450;map00982|Drug metabolism - cytochrome P450;map00625|Chloroalkane and chloroalkene degradation;map00626|Naphthalene degradation;map00350|Tyrosine metabolism;map00010|Glycolysis / Gluconeogenesis;map00071|Fatty acid degradation;map01220|Degradation of aromatic compounds;map01110|Biosynthesis of secondary metabolites;map00830|Retinol metabolism;m…
evm.model.contig1.952	Protein.evm.model.contig1.952::evm.model.contig1.952	2323416-2326467[+]	gi|636582622|ref|XM_008024459.1|	1105	E:0	Setosphaeria turcica Et28A hypothetical protein partial mRNA	OWY58154.1	1209	E:0	hypothetical protein AALT_g5305 [Alternaria alternata]	PF00612.27	IQ	IQ calmodulin-binding motif	ENOG410XSAR	asp (abnormal spindle) homolog, microcephaly associated (Drosophila)	GO:0030037|actin filament reorganization involved in cell cycle;GO:0030954|astral microtubule nucleation;GO:0048854|brain morphogenesis;GO:0051642|centrosome localization;GO:0007282|cystoblast division;GO:0051295|establishment of meiotic spindle localization;GO:0000132|establishment of mitotic spindle orientation;GO:0048132|female germ-line stem cell asymmetric division;GO:0030706|germarium-deriv…	GO:0005516|calmodulin binding;GO:0008017|microtubule binding;GO:0032027|myosin light chain bindingGO:0005515|protein binding	GO:0005813|centrosome;GO:0005737|cytoplasm;GO:0005874|microtubule;GO:0005875|microtubule associated complex;GO:0005815|microtubule organizing center;GO:0005634|nucleus;GO:0000922|spindle pole	K16743|ASPM, ASP; abnormal spindle-like microcephaly-associated protein	.
evm.model.contig4.573	Protein.evm.model.contig4.573::evm.model.contig4.573	1591989-1593444[+]	gi|189206541|ref|XM_001939570.1|	381	E:8e-103	Pyrenophora tritici-repentis Pt-1C-BFP conserved hypothetical protein, mRNA	XP_028505186.1	680	E:0	hypothetical protein AA0111_g7188 [Alternaria arborescens]	PF02535.22	Zip	ZIP Zinc transporter	ENOG410XQG5	Solute carrier family 39 (Zinc transporter), member 9	GO:0006829|zinc ion transportGO:0030001|metal ion transport;GO:0055085|transmembrane transport	GO:0046873|metal ion transmembrane transporter activityGO:0046873|metal ion transmembrane transporter activity	GO:0016021|integral component of membraneGO:0016020|membrane	K14715|SLC39A9, ZIP9; solute carrier family 39 (zinc transporter), member 9	.
evm.model.contig9.675	Protein.evm.model.contig9.675::evm.model.contig9.675	1787772-1788503[+]	gi|636592436|ref|XM_008029366.1|	444	E:6e-122	Setosphaeria turcica Et28A hypothetical protein partial mRNA	XP_028509994.1	370	E:5e-124	WD repeat-containing protein 5 [Alternaria arborescens]	PF00400.32	WD40	WD domain, G-beta repeat	ENOG410XP3K	Positively regulates the activity of the minus-end directed microtubule motor protein dynein. May enhance dynein- mediated microtubule sliding by targeting dynein to the microtubule plus end. Required for	GO:0051568|histone H3-K4 methylation;GO:0043984|histone H4-K16 acetylation;GO:0043981|histone H4-K5 acetylation;GO:0043982|histone H4-K8 acetylation	GO:0042393|histone bindingGO:0005515|protein binding	GO:0000123|histone acetyltransferase complex;GO:0071339|MLL1 complex;GO:0005634|nucleus;GO:0048188|Set1C/COMPASS complex	K14963|WDR5, SWD3, CPS30; COMPASS component SWD3	.
evm.model.contig8.226	Protein.evm.model.contig8.226::evm.model.contig8.226	684031-684804[-]	gi|189193174|ref|XM_001932891.1|	472	E:2e-130	Pyrenophora tritici-repentis Pt-1C-BFP conserved hypothetical protein, mRNA	XP_018391020.1	412	E:1e-144	hypothetical protein CC77DRAFT_1037637 [Alternaria alternata]	PF05700.11	BCAS2	Breast carcinoma amplified sequence 2 (BCAS2)	ENOG41101IB	Breast carcinoma amplified sequence 2	GO:0000398|mRNA splicing, via spliceosomeGO:0006397|mRNA processing	.	GO:0005730|nucleolus;GO:0005634|nucleus;GO:0000974|Prp19 complex;GO:0071007|U2-type catalytic step 2 spliceosome	K12861|BCAS2; pre-mRNA-splicing factor SPF27	map03040|Spliceosome
evm.model.contig1.1184	Protein.evm.model.contig1.1184::evm.model.contig1.1184	2898368-2902199[-]	gi|628188064|ref|XM_007709715.1|	128	E:3e-26	Bipolaris zeicola 26-R-13 hypothetical protein partial mRNA	XP_018389169.1	1079	E:0	RNA-directed RNA polymerase 2 [Alternaria alternata]	PF05183.12	RdRP	RNA dependent RNA polymerase	ENOG410XQMQ	rna polymerase	GO:0006952|defense response;GO:0060148|positive regulation of posttranscriptional gene silencing;GO:0070919|production of siRNA involved in chromatin silencing by small RNA;GO:0030422|production of siRNA involved in RNA interference;GO:0009751|response to salicylic acid;GO:0009615|response to virus;GO:0010025|wax biosynthetic process	GO:0003723|RNA binding;GO:0003968|RNA-directed 5'-3' RNA polymerase activityGO:0003968|RNA-directed 5'-3' RNA polymerase activity	GO:0031380|nuclear RNA-directed RNA polymerase complex;GO:0005634|nucleus	K11699|RDR, RDRP; RNA-dependent RNA polymerase [EC:2.7.7.48]	.
evm.model.contig3.924	Protein.evm.model.contig3.924::evm.model.contig3.924	2410652-2412289[-]	gi|189198921|ref|XM_001935763.1|	255	E:6e-65	Pyrenophora tritici-repentis Pt-1C-BFP conserved hypothetical protein, mRNA	RII20150.1	817	E:0	hypothetical protein CUC08_Gglean001550 [Alternaria sp. MG1]	PF04031.13	Las1	Las1-like	ENOG411230Q	LAS1-like (S. cerevisiae)	GO:0000460|maturation of 5.8S rRNA;GO:0000470|maturation of LSU-rRNA	GO:0004519|endonuclease activity	GO:0090730|Las1 complex;GO:0071339|MLL1 complex;GO:0005730|nucleolus;GO:0030687|preribosome, large subunit precursor	K16912|LAS1; ribosomal biogenesis protein LAS1	.
evm.model.contig9.580	Protein.evm.model.contig9.580::evm.model.contig9.580	1544917-1545503[+]	gi|636592030|ref|XM_008029163.1|	381	E:3e-103	Setosphaeria turcica Et28A hypothetical protein partial mRNA	XP_018382195.1	348	E:2e-112	D-xylulose 5-phosphate/D-fructose 6-phosphate phosphoketolase [Alternaria alternata]	PF09363.10	XFP_C	XFP C-terminal domain	COG3957	Phosphoketolase	GO:0005975|carbohydrate metabolic processGO:0005975|carbohydrate metabolic process	GO:0016832|aldehyde-lyase activityGO:0016832|aldehyde-lyase activity	.	K01621|xfp, xpk; xylulose-5-phosphate/fructose-6-phosphate phosphoketolase [EC:4.1.2.9 4.1.2.22]	map01120|Microbial metabolism in diverse environments;map01100|Metabolic pathways;map00710|Carbon fixation in photosynthetic organisms;map00030|Pentose phosphate pathway
evm.model.contig1.2115	Protein.evm.model.contig1.2115::evm.model.contig1.2115	5343179-5344144[+]	gi|636585850|ref|XM_008026073.1|	102	E:4e-19	Setosphaeria turcica Et28A hypothetical protein partial mRNA	XP_018381169.1	407	E:1e-140	fructose-bisphosphate aldolase [Alternaria alternata]	PF01116.20	F_bP_aldolase	Fructose-bisphosphate aldolase class-II	COG0191	Aldolase	GO:0006096|glycolytic processGO:0005975|carbohydrate metabolic process	GO:0004332|fructose-bisphosphate aldolase activity;GO:0008270|zinc ion bindingGO:0008270|zinc ion binding;GO:0016832|aldehyde-lyase activity	.	K01624|FBA, fbaA; fructose-bisphosphate aldolase, class II [EC:4.1.2.13]	map00030|Pentose phosphate pathway;map00680|Methane metabolism;map01200|Carbon metabolism;map01230|Biosynthesis of amino acids;map00010|Glycolysis / Gluconeogenesis;map00710|Carbon fixation in photosynthetic organisms;map01110|Biosynthesis of secondary metabolites;map00051|Fructose and mannose metabolism;map01100|Metabolic pathways;map01120|Microbial metabolism in diverse environments;map01130|Bi…
evm.model.contig8.686	Protein.evm.model.contig8.686::evm.model.contig8.686	1909328-1910910[+]	gi|189198811|ref|XM_001935708.1|	490	E:1e-135	Pyrenophora tritici-repentis Pt-1C-BFP glutamine synthetase, mRNA	RYN63977.1	690	E:0	hypothetical protein AA0117_g12580 [Alternaria alternata]	PF00120.24	Gln-synt_C	Glutamine synthetase, catalytic domain	COG0174	glutamine synthetase	GO:0006542|glutamine biosynthetic process;GO:0006598|polyamine catabolic processGO:0006807|nitrogen compound metabolic process	GO:0005524|ATP binding;GO:0004356|glutamate-ammonia ligase activity;GO:0008134|transcription factor bindingGO:0004356|glutamate-ammonia ligase activity	.	K01915|glnA, GLUL; glutamine synthetase [EC:6.3.1.2]	map00630|Glyoxylate and dicarboxylate metabolism;map00220|Arginine biosynthesis;map01230|Biosynthesis of amino acids;map00250|Alanine, aspartate and glutamate metabolism;map04724|Glutamatergic synapse;map04727|GABAergic synapse;map02020|Two-component system;map01100|Metabolic pathways;map01120|Microbial metabolism in diverse environments;map00910|Nitrogen metabolism
evm.model.contig8.851	Protein.evm.model.contig8.851::evm.model.contig8.851	2349240-2350477[+]	gi|628183090|ref|XM_007708542.1|	207	E:1e-50	Bipolaris zeicola 26-R-13 hypothetical protein partial mRNA	PWO13353.1	338	E:3e-111	Zn-finger protein [Pyrenophora tritici-repentis]	PF00096.26	zf-C2H2	Zinc finger, C2H2 type	COG5048	Zinc finger protein	GO:0030154|cell differentiation;GO:0045321|leukocyte activation;GO:0007275|multicellular organism development	GO:0003677|DNA binding;GO:0000981|DNA-binding transcription factor activity, RNA polymerase II-specific;GO:0042802|identical protein binding;GO:0008270|zinc ion bindingGO:0003676|nucleic acid binding	GO:0005634|nucleus	K09228|KRAB; KRAB domain-containing zinc finger protein	.
evm.model.contig7.206	Protein.evm.model.contig7.206::evm.model.contig7.206	541911-542741[+]	gi|396495918|ref|XM_003844614.1|	372	E:3e-100	Leptosphaeria maculans JN3 hypothetical protein (LEMA_P023130.1) mRNA, complete cds	RYN25564.1	244	E:1e-72	Striatin [Alternaria tenuissima]	PF08232.12	Striatin	Striatin family	ENOG410XR31	Striatin, calmodulin binding protein	GO:0030154|cell differentiation;GO:0000909|sporocarp development involved in sexual reproduction	GO:0005516|calmodulin binding	GO:0016020|membrane	K17608|STRN1_3_4; striatin 1/3/4	.
evm.model.contig10.263	Protein.evm.model.contig10.263::evm.model.contig10.263	664817-665310[-]	gi|636598342|ref|XM_008032319.1|	348	E:2e-93	Setosphaeria turcica Et28A hypothetical protein mRNA	OWY48466.1	240	E:1e-79	Prefoldin [Alternaria alternata]	PF01920.20	Prefoldin_2	Prefoldin subunit	ENOG4111Q46	protein folding	GO:0006457|protein foldingGO:0006457|protein folding	GO:0051082|unfolded protein bindingGO:0051082|unfolded protein binding	GO:0016272|prefoldin complexGO:0016272|prefoldin complex	K09548|PFDN1; prefoldin subunit 1	.
evm.model.contig5.368	Protein.evm.model.contig5.368::evm.model.contig5.368	980261-982762[-]	gi|189203034|ref|XM_001937818.1|	610	E:2e-171	Pyrenophora tritici-repentis Pt-1C-BFP nucleolar protein 14, mRNA	XP_018381449.1	1031	E:0	nucleolar protein 14 [Alternaria alternata]	PF04147.12	Nop14	Nop14-like family	ENOG410XNWY	Nucleolar protein	GO:0000480|endonucleolytic cleavage in 5'-ETS of tricistronic rRNA transcript (SSU-rRNA, 5.8S rRNA, LSU-rRNA);GO:0000447|endonucleolytic cleavage in ITS1 to separate SSU-rRNA from 5.8S rRNA and LSU-rRNA from tricistronic rRNA transcript (SSU-rRNA, 5.8S rRNA, LSU-rRNA);GO:0000472|endonucleolytic cleavage to generate mature 5'-end of SSU-rRNA from (SSU-rRNA, 5.8S rRNA, LSU-rRNA);GO:0042274|ribosoma…	GO:0030515|snoRNA binding	GO:0030692|Noc4p-Nop14p complex;GO:0005730|nucleolus;GO:0032040|small-subunit processomeGO:0032040|small-subunit processome	K14766|NOP14, UTP2; nucleolar protein 14	.
evm.model.contig2.615	Protein.evm.model.contig2.615::evm.model.contig2.615	1615987-1617443[-]	gi|636594272|ref|XM_008030284.1|	156	E:4e-35	Setosphaeria turcica Et28A hypothetical protein mRNA	RII21414.1	567	E:0	hypothetical protein CUC08_Gglean000576 [Alternaria sp. MG1]	PF10436.9	BCDHK_Adom3	Mitochondrial branched-chain alpha-ketoacid dehydrogenase kinase	COG0642	Histidine kinase	GO:0046777|protein autophosphorylation	GO:0005524|ATP binding;GO:0009927|histidine phosphotransfer kinase activity;GO:0042803|protein homodimerization activity;GO:0004740|pyruvate dehydrogenase (acetyl-transferring) kinase activity	GO:0005829|cytosol;GO:0005739|mitochondrion	K00898|PDK2_3_4; pyruvate dehydrogenase kinase 2/3/4 [EC:2.7.11.2]	.
evm.model.contig1.2071	Protein.evm.model.contig1.2071::evm.model.contig1.2071	5206084-5207439[-]	gi|636585786|ref|XM_008026041.1|	811	E:0	Setosphaeria turcica Et28A hypothetical protein mRNA	XP_018381224.1	862	E:0	flavo protein [Alternaria alternata]	PF02441.19	Flavoprotein	Flavoprotein	COG0452	Phosphopantothenoylcysteine decarboxylase	GO:0015937|coenzyme A biosynthetic process	GO:0042802|identical protein binding;GO:0004633|phosphopantothenoylcysteine decarboxylase activityGO:0003824|catalytic activity	.	K01598|PPCDC, coaC; phosphopantothenoylcysteine decarboxylase [EC:4.1.1.36]	map01100|Metabolic pathways;map00770|Pantothenate and CoA biosynthesis
evm.model.contig7.640	Protein.evm.model.contig7.640::evm.model.contig7.640	1637516-1638962[-]	gi|636600054|ref|XM_008033175.1|	451	E:5e-124	Setosphaeria turcica Et28A hypothetical protein mRNA	XP_018386610.1	320	E:7e-100	Pkinase-domain-containing protein [Alternaria alternata]	PF00069.25	Pkinase	Protein kinase domain	ENOG410XP9G	mitogen-activated protein kinase kinase kinase kinase	GO:0032147|activation of protein kinase activity;GO:0007049|cell cycle;GO:0051301|cell division;GO:0035329|hippo signaling;GO:0006972|hyperosmotic response;GO:0051781|positive regulation of cell division;GO:1903438|positive regulation of mitotic cytokinetic process;GO:0046777|protein autophosphorylation;GO:0006468|protein phosphorylation;GO:0032956|regulation of actin cytoskeleton organization;GO…	GO:0003779|actin binding;GO:0005524|ATP binding;GO:0046872|metal ion binding;GO:0004672|protein kinase activity;GO:0004674|protein serine/threonine kinase activityGO:0004672|protein kinase activity;GO:0005524|ATP binding	GO:0015629|actin cytoskeleton;GO:0032154|cleavage furrow;GO:0005737|cytoplasm;GO:0005829|cytosol;GO:0005815|microtubule organizing center;GO:0005634|nucleus;GO:0005819|spindle	K08838|STK24_25_MST4; serine/threonine-protein kinase 24/25/MST4 [EC:2.7.11.1]	.
evm.model.contig7.467	Protein.evm.model.contig7.467::evm.model.contig7.467	1188903-1190245[+]	gi|628063316|ref|XM_007698954.1|	346	E:3e-92	Cochliobolus sativus ND90Pr glycoside hydrolase family 6 protein partial mRNA	XP_018386788.1	608	E:0	cellobiohydrolase-like protein II precursor [Alternaria alternata]	PF01341.17	Glyco_hydro_6	Glycosyl hydrolases family 6	COG5297	Cellobiohydrolase	GO:0030245|cellulose catabolic processGO:0030245|cellulose catabolic process	GO:0016162|cellulose 1,4-beta-cellobiosidase activityGO:0004553|hydrolase activity, hydrolyzing O-glycosyl compounds	GO:0005576|extracellular region	.	map02020|Two-component system;map00500|Starch and sucrose metabolism
evm.model.contig7.658	Protein.evm.model.contig7.658::evm.model.contig7.658	1684210-1686189[+]	gi|189193906|ref|XM_001933257.1|	370	E:2e-99	Pyrenophora tritici-repentis Pt-1C-BFP purine transporter, mRNA	RII10285.1	769	E:0	purine transporter [Alternaria sp. MG1]	PF00860.20	Xan_ur_permease	Permease family	COG2252	Xanthine uracil vitamin C permease	GO:0051503|adenine nucleotide transport;GO:0015853|adenine transport;GO:1903790|guanine nucleotide transmembrane transport;GO:0015854|guanine transport;GO:0006863|purine nucleobase transportGO:0055085|transmembrane transport	GO:0000295|adenine nucleotide transmembrane transporter activity;GO:0001409|guanine nucleotide transmembrane transporter activity;GO:0005345|purine nucleobase transmembrane transporter activityGO:0022857|transmembrane transporter activity	GO:0016021|integral component of membrane;GO:0005886|plasma membraneGO:0016020|membrane	K06901|pbuG; putative MFS transporter, AGZA family, xanthine/uracil permease	.
evm.model.contig1.39	Protein.evm.model.contig1.39::evm.model.contig1.39	120695-121773[+]	gi|928509710|ref|XM_014218184.1|	147	E:2e-32	Bipolaris maydis ATCC 48331 hypothetical protein mRNA	XP_018381603.1	403	E:9e-136	Phosphoacetylglucosamine mutase [Alternaria alternata]	PF02878.16	PGM_PMM_I	Phosphoglucomutase/phosphomannomutase, alpha/beta/alpha domain I	COG1109	Catalyzes the conversion of glucosamine-6-phosphate to glucosamine-1-phosphate (By similarity)	GO:0005975|carbohydrate metabolic process;GO:0019255|glucose 1-phosphate metabolic process;GO:0030097|hemopoiesis;GO:0006487|protein N-linked glycosylation;GO:0006493|protein O-linked glycosylation;GO:0007283|spermatogenesis;GO:0006048|UDP-N-acetylglucosamine biosynthetic processGO:0005975|carbohydrate metabolic process	GO:0000287|magnesium ion binding;GO:0004610|phosphoacetylglucosamine mutase activity;GO:0004614|phosphoglucomutase activityGO:0016868|intramolecular transferase activity, phosphotransferases	.	K01836|E5.4.2.3; phosphoacetylglucosamine mutase [EC:5.4.2.3]	map01100|Metabolic pathways;map00520|Amino sugar and nucleotide sugar metabolism;map01130|Biosynthesis of antibiotics
evm.model.contig2.1575	Protein.evm.model.contig2.1575::evm.model.contig2.1575	4013486-4015281[-]	gi|636587018|ref|XM_008026657.1|	638	E:5e-180	Setosphaeria turcica Et28A hypothetical protein partial mRNA	RYO00017.1	464	E:6e-155	External alternative NAD(P)H-ubiquinone oxidoreductase [Alternaria tenuissima]	PF07992.14	Pyr_redox_2	Pyridine nucleotide-disulphide oxidoreductase	COG1252	Nadh dehydrogenase	GO:0055114|oxidation-reduction processGO:0055114|oxidation-reduction process	GO:0005509|calcium ion binding;GO:0016491|oxidoreductase activityGO:0016491|oxidoreductase activity;GO:0005509|calcium ion binding	GO:0031314|extrinsic component of mitochondrial inner membrane;GO:0005758|mitochondrial intermembrane space;GO:0005777|peroxisome	K17871|ndh1; NADH:ubiquinone reductase (non-electrogenic) [EC:1.6.5.9]	.
evm.model.contig1.584	Protein.evm.model.contig1.584::evm.model.contig1.584	1449115-1449966[+]	gi|169598857|ref|XM_001792800.1|	246	E:2e-62	Phaeosphaeria nodorum SN15 hypothetical protein partial mRNA	XP_018389987.1	570	E:0	carbonic anhydrase [Alternaria alternata]	PF00194.21	Carb_anhydrase	Eukaryotic-type carbonic anhydrase	COG3338	Carbonic anhydrase	.	GO:0004089|carbonate dehydratase activity;GO:0008270|zinc ion binding	GO:0042597|periplasmic space	K01674|cah; carbonic anhydrase [EC:4.2.1.1]	map00910|Nitrogen metabolism
evm.model.contig3.581	Protein.evm.model.contig3.581::evm.model.contig3.581	1513018-1513698[+]	gi|597588294|ref|XM_007297142.1|	62.1	E:7e-07	Marssonina brunnea f. sp. 'multigermtubi' MB_m1 aminotransferase (MBM_09315), mRNA	OWY52535.1	373	E:4e-125	PLP-dependent transferase [Alternaria alternata]	PF00155.21	Aminotran_1_2	Aminotransferase class I and II	COG0156	8-Amino-7-oxononanoate synthase	GO:0009102|biotin biosynthetic processGO:0009058|biosynthetic process	GO:0008710|8-amino-7-oxononanoate synthase activity;GO:0030170|pyridoxal phosphate bindingGO:0030170|pyridoxal phosphate binding	.	K00652|bioF; 8-amino-7-oxononanoate synthase [EC:2.3.1.47]	map01100|Metabolic pathways;map00780|Biotin metabolism
evm.model.contig4.817	Protein.evm.model.contig4.817::evm.model.contig4.817	2232261-2235386[+]	gi|189202891|ref|XM_001937747.1|	425	E:5e-116	Pyrenophora tritici-repentis Pt-1C-BFP conserved hypothetical protein, mRNA	RYO41860.1	484	E:1e-165	hypothetical protein AG0111_g5898 [Alternaria gaisen]	PF02146.17	SIR2	Sir2 family	COG0846	NAD-dependent protein deacetylase which modulates the activities of several enzymes which are inactive in their acetylated form	GO:0042742|defense response to bacterium;GO:0009873|ethylene-activated signaling pathway;GO:0043970|histone H3-K9 acetylation;GO:0031348|negative regulation of defense response;GO:0006471|protein ADP-ribosylation	GO:0070403|NAD+ binding;GO:0034979|NAD-dependent protein deacetylase activity;GO:0008270|zinc ion bindingGO:0070403|NAD+ binding	GO:0005759|mitochondrial matrix;GO:0005634|nucleus	K11414|SIRT4, SIR2L4; NAD-dependent deacetylase sirtuin 4 [EC:3.5.1.-]	.
evm.model.contig10.86	Protein.evm.model.contig10.86::evm.model.contig10.86	213372-215519[+]	gi|169608272|ref|XM_001797504.1|	121	E:2e-24	Phaeosphaeria nodorum SN15 hypothetical protein partial mRNA	RYN94820.1	519	E:5e-174	hypothetical protein AA0120_g3977 [Alternaria tenuissima]	PF00153.27	Mito_carr	Mitochondrial carrier protein	ENOG4110BII	mitochondrial carrier protein	GO:0015805|S-adenosyl-L-methionine transport	GO:0000095|S-adenosyl-L-methionine transmembrane transporter activity	GO:0016021|integral component of membrane;GO:0005743|mitochondrial inner membrane	K15111|SLC25A26; solute carrier family 25 (mitochondrial S-adenosylmethionine transporter), member 26	.
evm.model.contig5.881	Protein.evm.model.contig5.881::evm.model.contig5.881	2291709-2293062[-]	gi|928525639|ref|XM_014226142.1|	481	E:8e-133	Bipolaris maydis ATCC 48331 hypothetical protein partial mRNA	XP_018387063.1	717	E:0	hypothetical protein CC77DRAFT_820079 [Alternaria alternata]	PF13639.6	zf-RING_2	Ring finger domain	ENOG410Z5DF	Ring finger protein	GO:0045786|negative regulation of cell cycle;GO:0000209|protein polyubiquitination;GO:0006511|ubiquitin-dependent protein catabolic process	GO:0061630|ubiquitin protein ligase activity;GO:0004842|ubiquitin-protein transferase activity;GO:0008270|zinc ion bindingGO:0046872|metal ion binding	GO:0005737|cytoplasm;GO:0012505|endomembrane system;GO:0016021|integral component of membrane	K15706|RNF167; E3 ubiquitin-protein ligase RNF167 [EC:2.3.2.27]	.
evm.model.contig4.778	Protein.evm.model.contig4.778::evm.model.contig4.778	2136556-2137296[+]	gi|627836059|ref|XM_007690209.1|	571	E:3e-160	Bipolaris oryzae ATCC 44560 hypothetical protein partial mRNA	RYO60587.1	355	E:3e-120	hypothetical protein AA0116_g5896 [Alternaria tenuissima]	PF03371.15	PRP38	PRP38 family	ENOG410XQ3F	RNA splicing	GO:0006397|mRNA processing;GO:0008380|RNA splicing	.	GO:0071011|precatalytic spliceosome	K12849|PRPF38A; pre-mRNA-splicing factor 38A	map03040|Spliceosome
evm.model.contig1.2586	Protein.evm.model.contig1.2586::evm.model.contig1.2586	6640480-6642011[-]	gi|189191009|ref|XM_001931809.1|	1206	E:0	Pyrenophora tritici-repentis Pt-1C-BFP hypothetical protein, mRNA	OWY43409.1	664	E:0	c2h2 finger-like protein [Alternaria alternata]	PF00096.26	zf-C2H2	Zinc finger, C2H2 type	COG5048	Zinc finger protein	GO:0006914|autophagy;GO:0007040|lysosome organization;GO:0010507|negative regulation of autophagy;GO:2000773|negative regulation of cellular senescence;GO:0000122|negative regulation of transcription by RNA polymerase II;GO:0045892|negative regulation of transcription, DNA-templated;GO:0045893|positive regulation of transcription, DNA-templated	GO:0003682|chromatin binding;GO:0003677|DNA binding;GO:0003700|DNA-binding transcription factor activity;GO:0001227|DNA-binding transcription repressor activity, RNA polymerase II-specific;GO:0046872|metal ion binding;GO:0000978|RNA polymerase II proximal promoter sequence-specific DNA binding;GO:0043565|sequence-specific DNA bindingGO:0003676|nucleic acid binding	GO:0005737|cytoplasm;GO:0005829|cytosol;GO:0005654|nucleoplasm;GO:0005634|nucleus	K09229|ZKSCAN; KRAB and SCAN domains-containing zinc finger protein	.
evm.model.contig5.980	Protein.evm.model.contig5.980::evm.model.contig5.980	2563804-2568342[+]	gi|636584482|ref|XM_008025389.1|	789	E:0	Setosphaeria turcica Et28A hypothetical protein mRNA	OWY50331.1	1051	E:0	vacuolar protein sorting-associated protein 70 [Alternaria alternata]	PF00085.20	Thioredoxin	Thioredoxin	COG2234	peptidase m28	GO:0045454|cell redox homeostasis	GO:0004180|carboxypeptidase activity;GO:0046872|metal ion binding;GO:0008237|metallopeptidase activity	GO:0005576|extracellular region	K01301|NAALAD; N-acetylated-alpha-linked acidic dipeptidase [EC:3.4.17.21]	.
evm.model.contig2.1902	Protein.evm.model.contig2.1902::evm.model.contig2.1902	4862106-4862981[+]	gi|928531035|ref|XM_014228840.1|	363	E:2e-97	Bipolaris maydis ATCC 48331 hypothetical protein mRNA	OWY42618.1	339	E:1e-115	myb DNA-binding domain protein [Alternaria alternata]	PF00249.31	Myb_DNA-binding	Myb-like DNA-binding domain	COG5147	Myblike DNAbinding domain containing protein	GO:0006974|cellular response to DNA damage stimulus;GO:0008285|negative regulation of cell population proliferation;GO:0045892|negative regulation of transcription, DNA-templated;GO:0009733|response to auxin;GO:0009723|response to ethylene;GO:0009753|response to jasmonic acid;GO:0009751|response to salicylic acid	GO:0003700|DNA-binding transcription factor activity;GO:0043565|sequence-specific DNA binding	GO:0005634|nucleus	K09422|MYBP; myb proto-oncogene protein, plant	.
evm.model.contig7.215	Protein.evm.model.contig7.215::evm.model.contig7.215	564959-569972[+]	gi|636583626|ref|XM_008024961.1|	2050	E:0	Setosphaeria turcica Et28A hypothetical protein partial mRNA	XP_001542934.1	1973	E:0	hypothetical protein HCAG_03105 [Histoplasma capsulatum NAm1]	PF02736.19	Myosin_N	Myosin N-terminal SH3-like domain	COG5022	myosin heavy chain	GO:0007118|budding cell apical bud growth;GO:0000132|establishment of mitotic spindle orientation;GO:0048313|Golgi inheritance;GO:0007107|membrane addition at site of cytokinesis;GO:0000001|mitochondrion inheritance;GO:0045033|peroxisome inheritance;GO:0015031|protein transport;GO:0009826|unidimensional cell growth;GO:0000011|vacuole inheritance;GO:0006904|vesicle docking involved in exocytosis;G…	GO:0051015|actin filament binding;GO:0005524|ATP binding;GO:0005516|calmodulin binding;GO:0000146|microfilament motor activityGO:0003774|motor activity;GO:0005524|ATP binding;GO:0005515|protein binding	GO:0032432|actin filament bundle;GO:0005935|cellular bud neck;GO:0005934|cellular bud tip;GO:0031941|filamentous actin;GO:0000329|fungal-type vacuole membrane;GO:0000131|incipient cellular bud site;GO:0043332|mating projection tip;GO:0071563|Myo2p-Vac17p-Vac8p transport complex;GO:0016459|myosin complex;GO:0030133|transport vesicleGO:0016459|myosin complex	K10357|MYO5; myosin V	.
evm.model.contig1.2544	Protein.evm.model.contig1.2544::evm.model.contig1.2544	6534228-6534839[+]	gi|702073514|emb|FO905888.1|	337	E:9e-90	Leptosphaeria biglobosa Thlaspii ibcn65_scaffold00013 complete sequence	RYN91658.1	386	E:1e-128	putative endo-1,3(4)-beta-glucanase [Alternaria tenuissima]	PF17652.1	Glyco_hydro81C	Glycosyl hydrolase family 81 C-terminal domain	COG5498	Hydrolase	GO:0008152|metabolic process	GO:0052861|glucan endo-1,3-beta-glucanase activity, C-3 substituted reducing group;GO:0052862|glucan endo-1,4-beta-glucanase activity, C-3 substituted reducing group	GO:0005618|cell wall;GO:0005576|extracellular region	K01180|E3.2.1.6; endo-1,3(4)-beta-glucanase [EC:3.2.1.6]	.
evm.model.contig5.371	Protein.evm.model.contig5.371::evm.model.contig5.371	986993-988188[-]	gi|636589428|ref|XM_008027862.1|	318	E:4e-84	Setosphaeria turcica Et28A glycoside hydrolase family 18 protein partial mRNA	XP_008026053.1	370	E:1e-124	glycoside hydrolase family 18 protein [Exserohilum turcica Et28A]	PF00704.28	Glyco_hydro_18	Glycosyl hydrolases family 18	COG3325	chitinase	GO:0006032|chitin catabolic process;GO:0000272|polysaccharide catabolic processGO:0005975|carbohydrate metabolic process	GO:0008061|chitin binding;GO:0004568|chitinase activity	.	K01183|E3.2.1.14; chitinase [EC:3.2.1.14]	map01100|Metabolic pathways;map00520|Amino sugar and nucleotide sugar metabolism;map00500|Starch and sucrose metabolism
evm.model.contig1.1948	Protein.evm.model.contig1.1948::evm.model.contig1.1948	4870112-4871705[+]	gi|636585984|ref|XM_008026140.1|	1079	E:0	Setosphaeria turcica Et28A hypothetical protein mRNA	XP_028510496.1	889	E:0	Mitochondrial Rho GTPase 1 [Alternaria arborescens]	PF08356.12	EF_assoc_2	EF hand associated	ENOG410XRHW	Mitochondrial GTPase involved in mitochondrial trafficking (By similarity)	GO:0007005|mitochondrion organization	GO:0005509|calcium ion binding;GO:0005525|GTP binding;GO:0003924|GTPase activityGO:0005509|calcium ion binding;GO:0003924|GTPase activity;GO:0005525|GTP binding	GO:0031307|integral component of mitochondrial outer membrane	K07870|RHOT1, ARHT1; Ras homolog gene family, member T1	.
evm.model.contig5.241	Protein.evm.model.contig5.241::evm.model.contig5.241	683093-684805[-]	gi|169602306|ref|XM_001794523.1|	477	E:1e-131	Phaeosphaeria nodorum SN15 hypothetical protein partial mRNA	XP_018381321.1	798	E:0	homogentisate 1,2-dioxygenase [Alternaria alternata]	PF04209.13	HgmA	homogentisate 1,2-dioxygenase	COG3508	homogentisate 1,2-dioxygenase activity	GO:0006520|cellular amino acid metabolic process;GO:0006559|L-phenylalanine catabolic process;GO:0006572|tyrosine catabolic processGO:0006559|L-phenylalanine catabolic process;GO:0006570|tyrosine metabolic process;GO:0055114|oxidation-reduction process	GO:0004411|homogentisate 1,2-dioxygenase activity;GO:0042802|identical protein binding;GO:0046872|metal ion bindingGO:0004411|homogentisate 1,2-dioxygenase activity	.	K00451|HGD, hmgA; homogentisate 1,2-dioxygenase [EC:1.13.11.5]	map00643|Styrene degradation;map01100|Metabolic pathways;map01120|Microbial metabolism in diverse environments;map00350|Tyrosine metabolism
evm.model.contig2.939	Protein.evm.model.contig2.939::evm.model.contig2.939	2401501-2403713[+]	gi|189209895|ref|XM_001941245.1|	811	E:0	Pyrenophora tritici-repentis Pt-1C-BFP serine/threonine-protein kinase 3, mRNA	OWY45968.1	1245	E:0	Pkinase-like protein [Alternaria alternata]	PF00069.25	Pkinase	Protein kinase domain	ENOG410XP9G	mitogen-activated protein kinase kinase kinase kinase	GO:0032147|activation of protein kinase activity;GO:0007049|cell cycle;GO:0051301|cell division;GO:0035329|hippo signaling;GO:0006972|hyperosmotic response;GO:0051781|positive regulation of cell division;GO:1903438|positive regulation of mitotic cytokinetic process;GO:0046777|protein autophosphorylation;GO:0006468|protein phosphorylation;GO:0032956|regulation of actin cytoskeleton organization;GO…	GO:0003779|actin binding;GO:0005524|ATP binding;GO:0046872|metal ion binding;GO:0004672|protein kinase activity;GO:0004674|protein serine/threonine kinase activityGO:0004672|protein kinase activity;GO:0005524|ATP binding	GO:0015629|actin cytoskeleton;GO:0032154|cleavage furrow;GO:0005737|cytoplasm;GO:0005829|cytosol;GO:0005815|microtubule organizing center;GO:0005634|nucleus;GO:0005819|spindle	K08838|STK24_25_MST4; serine/threonine-protein kinase 24/25/MST4 [EC:2.7.11.1]	.
evm.model.contig1.2451	Protein.evm.model.contig1.2451::evm.model.contig1.2451	6278710-6280913[-]	gi|702066582|emb|FO905662.1|	765	E:0	Leptosphaeria biglobosa brassicae b35_scaffold00002 complete sequence	RYN24950.1	1103	E:0	hypothetical protein AA0112_g8756 [Alternaria arborescens]	PF00149.28	Metallophos	Calcineurin-like phosphoesterase	COG0737	5-Nucleotidase	GO:0009166|nucleotide catabolic processGO:0009166|nucleotide catabolic process	GO:0016787|hydrolase activityGO:0016787|hydrolase activity	.	K11751|ushA; 5'-nucleotidase / UDP-sugar diphosphatase [EC:3.1.3.5 3.6.1.45]	map00760|Nicotinate and nicotinamide metabolism;map01100|Metabolic pathways;map01110|Biosynthesis of secondary metabolites;map00240|Pyrimidine metabolism;map00230|Purine metabolism
evm.model.contig1.1029	Protein.evm.model.contig1.1029::evm.model.contig1.1029	2510926-2512905[+]	gi|953436738|ref|XM_014704955.1|	813	E:0	Bipolaris victoriae FI3 hypothetical protein partial mRNA	RII06505.1	918	E:0	hypothetical protein CUC08_Gglean009729 [Alternaria sp. MG1]	PF00382.19	TFIIB	Transcription factor TFIIB repeat	COG1405	Stabilizes TBP binding to an archaeal box-A promoter. Also responsible for recruiting RNA polymerase II to the pre- initiation complex (DNA-TBP-TFIIB) (By similarity)	GO:0001112|DNA-templated transcriptional open complex formation;GO:0090074|negative regulation of protein homodimerization activity;GO:0006355|regulation of transcription, DNA-templated;GO:0070898|RNA polymerase III preinitiation complex assembly;GO:0070893|transposon integration	GO:0003677|DNA binding;GO:0046872|metal ion binding;GO:0000994|RNA polymerase III core binding;GO:0000995|RNA polymerase III general transcription initiation factor activity;GO:0017025|TBP-class protein binding;GO:0001156|TFIIIC-class transcription factor complex bindingGO:0017025|TBP-class protein binding;GO:0003677|DNA binding	GO:0000126|transcription factor TFIIIB complex	K15196|BRF1, GTF3B; transcription factor IIIB 90 kDa subunit	.
evm.model.contig9.145	Protein.evm.model.contig9.145::evm.model.contig9.145	367010-369434[-]	gi|627818676|ref|XM_007683988.1|	942	E:0	Bipolaris oryzae ATCC 44560 hypothetical protein partial mRNA	XP_018382023.1	604	E:0	WD40 repeat-like protein [Alternaria alternata]	PF00400.32	WD40	WD domain, G-beta repeat	ENOG410XPJ4	serine threonine kinase receptor associated protein	GO:0030512|negative regulation of transforming growth factor beta receptor signaling pathway	GO:0005515|protein binding	.	K13137|STRAP, UNRIP; serine-threonine kinase receptor-associated protein	map03013|RNA transport
evm.model.contig3.752	Protein.evm.model.contig3.752::evm.model.contig3.752	1958526-1959620[+]	gi|169613620|ref|XM_001800175.1|	289	E:5e-75	Phaeosphaeria nodorum SN15 hypothetical protein partial mRNA	OWY52697.1	611	E:0	DnaJ-like protein [Alternaria alternata]	PF00226.31	DnaJ	DnaJ domain	COG2214	DNAj domain protein	GO:0000122|negative regulation of transcription by RNA polymerase II;GO:1901998|toxin transport	GO:0003723|RNA binding	GO:0005737|cytoplasm;GO:0005634|nucleus	K09537|DNAJC17; DnaJ homolog subfamily C member 17	.
evm.model.contig3.709	Protein.evm.model.contig3.709::evm.model.contig3.709	1843236-1844477[+]	gi|189188567|ref|XM_001930588.1|	241	E:1e-60	Pyrenophora tritici-repentis Pt-1C-BFP threonine dehydratase catabolic, mRNA	RYN27618.1	558	E:0	hypothetical protein AA0115_g6385 [Alternaria tenuissima]	PF00291.25	PALP	Pyridoxal-phosphate dependent enzyme	COG1171	Threonine dehydratase	GO:0070179|D-serine biosynthetic process;GO:0070178|D-serine metabolic process;GO:0006563|L-serine metabolic process;GO:0042866|pyruvate biosynthetic process;GO:0009069|serine family amino acid metabolic process	GO:0005524|ATP binding;GO:0008721|D-serine ammonia-lyase activity;GO:0003941|L-serine ammonia-lyase activity;GO:0000287|magnesium ion binding;GO:0043621|protein self-association;GO:0030170|pyridoxal phosphate binding;GO:0030378|serine racemase activity;GO:0018114|threonine racemase activity	.	K12235|SRR; serine racemase [EC:5.1.1.18]	map00260|Glycine, serine and threonine metabolism
evm.model.contig9.649	Protein.evm.model.contig9.649::evm.model.contig9.649	1728002-1730478[-]	gi|627806912|ref|XM_007678614.1|	147	E:6e-32	Baudoinia panamericana UAMH 10762 hypothetical protein mRNA	RYO53709.1	1191	E:0	Potassium transporter 5 [Alternaria tenuissima]	PF02705.16	K_trans	K+ potassium transporter	COG3158	Transport of potassium into the cell (By similarity)	GO:0006813|potassium ion transportGO:0071805|potassium ion transmembrane transport	GO:0015079|potassium ion transmembrane transporter activity;GO:0009674|potassium:sodium symporter activityGO:0015079|potassium ion transmembrane transporter activity	GO:0016021|integral component of membrane;GO:0016020|membrane;GO:0005886|plasma membraneGO:0016020|membrane	K03549|kup; KUP system potassium uptake protein	.
evm.model.contig8.89	Protein.evm.model.contig8.89::evm.model.contig8.89	257182-259069[-]	gi|189200061|ref|XM_001936333.1|	778	E:0	Pyrenophora tritici-repentis Pt-1C-BFP far upstream element-binding protein 2, mRNA	RYO40276.1	689	E:0	hypothetical protein AG0111_g6699 [Alternaria gaisen]	PF00013.29	KH_1	KH domain	ENOG410XZYE	Far upstream element (FUSE) binding protein	GO:0061158|3'-UTR-mediated mRNA destabilization;GO:0071345|cellular response to cytokine stimulus;GO:0010586|miRNA metabolic process;GO:0006402|mRNA catabolic process;GO:0006397|mRNA processing;GO:0051028|mRNA transport;GO:0010989|negative regulation of low-density lipoprotein particle clearance;GO:0045019|negative regulation of nitric oxide biosynthetic process;GO:0061014|positive regulation of …	GO:0003677|DNA binding;GO:0035925|mRNA 3'-UTR AU-rich region binding;GO:0003730|mRNA 3'-UTR binding;GO:0003729|mRNA bindingGO:0003723|RNA binding	GO:0010494|cytoplasmic stress granule;GO:0005829|cytosol;GO:0030425|dendrite;GO:0043025|neuronal cell body;GO:0005654|nucleoplasm;GO:0005634|nucleus	K13210|FUBP; far upstream element-binding protein	.
evm.model.contig4.546	Protein.evm.model.contig4.546::evm.model.contig4.546	1517657-1518691[-]	gi|189206571|ref|XM_001939585.1|	265	E:6e-68	Pyrenophora tritici-repentis Pt-1C-BFP twinfilin-1, mRNA	RYN57442.1	493	E:2e-173	hypothetical protein AA0114_g2439 [Alternaria tenuissima]	PF00241.20	Cofilin_ADF	Cofilin/tropomyosin-type actin-binding protein	ENOG410XS1J	Twinfilin, actin-binding protein, homolog	GO:0030042|actin filament depolymerization;GO:0051016|barbed-end actin filament capping;GO:0030030|cell projection organization;GO:0071363|cellular response to growth factor stimulus;GO:0071300|cellular response to retinoic acid;GO:0030837|negative regulation of actin filament polymerization;GO:0045773|positive regulation of axon extension;GO:0010592|positive regulation of lamellipodium assembly;…	GO:0051015|actin filament binding;GO:0003785|actin monomer binding;GO:0005524|ATP binding;GO:0045296|cadherin binding;GO:0005546|phosphatidylinositol-4,5-bisphosphate binding;GO:0005080|protein kinase C binding;GO:0003723|RNA bindingGO:0003779|actin binding	GO:0005884|actin filament;GO:0005737|cytoplasm;GO:0070062|extracellular exosome;GO:0030175|filopodium;GO:0030426|growth cone;GO:0030027|lamellipodium;GO:0030016|myofibril;GO:0048471|perinuclear region of cytoplasm;GO:0032420|stereociliumGO:0005622|intracellular	K08870|TWF; twinfilin	.
evm.model.contig1.804	Protein.evm.model.contig1.804::evm.model.contig1.804	1974708-1975684[+]	gi|627829442|ref|XM_007688122.1|	708	E:0	Bipolaris oryzae ATCC 44560 hypothetical protein partial mRNA	XP_018389780.1	451	E:2e-157	short-chain dehydrogenase/reductase-like protein SDR [Alternaria alternata]	PF13561.6	adh_short_C2	Enoyl-(Acyl carrier protein) reductase	ENOG410XNW1	)-reductase	GO:0030497|fatty acid elongation	GO:0102131|3-oxo-glutaryl-[acp] methyl ester reductase activity;GO:0102132|3-oxo-pimeloyl-[acp] methyl ester reductase activity;GO:0004316|3-oxoacyl-[acyl-carrier-protein] reductase (NADPH) activity;GO:0051287|NAD binding;GO:0050661|NADP binding	.	K00059|fabG; 3-oxoacyl-[acyl-carrier protein] reductase [EC:1.1.1.100]	map01040|Biosynthesis of unsaturated fatty acids;map01100|Metabolic pathways;map00061|Fatty acid biosynthesis;map01212|Fatty acid metabolism;map00780|Biotin metabolism
evm.model.contig3.1169	Protein.evm.model.contig3.1169::evm.model.contig3.1169	3085849-3088745[+]	gi|953416762|ref|XM_014694967.1|	1046	E:0	Bipolaris victoriae FI3 hypothetical protein partial mRNA	RYO26426.1	876	E:0	hypothetical protein AA0113_g12484 [Alternaria arborescens]	PF01734.22	Patatin	Patatin-like phospholipase	ENOG410XQXJ	patatin-like phospholipase domain containing 8	GO:0019369|arachidonic acid metabolic process;GO:0050482|arachidonic acid secretion;GO:0008219|cell death;GO:0006631|fatty acid metabolic process;GO:0043651|linoleic acid metabolic process;GO:0036151|phosphatidylcholine acyl-chain remodeling;GO:0034638|phosphatidylcholine catabolic process;GO:0036152|phosphatidylethanolamine acyl-chain remodeling;GO:0046338|phosphatidylethanolamine catabolic proc…	GO:0005524|ATP binding;GO:0047499|calcium-independent phospholipase A2 activity;GO:0004622|lysophospholipase activityGO:0043531|ADP binding	GO:0005789|endoplasmic reticulum membrane;GO:0000139|Golgi membrane;GO:0016021|integral component of membrane;GO:0016020|membrane;GO:0048471|perinuclear region of cytoplasm;GO:0005778|peroxisomal membrane;GO:0005777|peroxisome	K16815|PNPLA8; calcium-independent phospholipase A2-gamma	.
evm.model.contig5.697	Protein.evm.model.contig5.697::evm.model.contig5.697	1846468-1847627[-]	gi|953432384|ref|XM_014702778.1|	555	E:4e-155	Bipolaris victoriae FI3 hypothetical protein partial mRNA	XP_018386890.1	737	E:0	hypothetical protein CC77DRAFT_960539 [Alternaria alternata]	PF00226.31	DnaJ	DnaJ domain	COG0484	ATP binding to DnaK triggers the release of the substrate protein, thus completing the reaction cycle. Several rounds of ATP-dependent interactions between DnaJ, DnaK and GrpE are required for fully efficient folding. Also involved, together with DnaK and GrpE, in the DNA replication of plasmids through activation of initiation proteins (By similarity)	GO:0006260|DNA replication;GO:0006457|protein folding;GO:0009408|response to heat	GO:0005524|ATP binding;GO:0031072|heat shock protein binding;GO:0051082|unfolded protein binding;GO:0008270|zinc ion binding	GO:0005737|cytoplasm	K03686|dnaJ; molecular chaperone DnaJ	.
evm.model.contig8.72	Protein.evm.model.contig8.72::evm.model.contig8.72	203315-204527[-]	gi|189200071|ref|XM_001936338.1|	529	E:2e-147	Pyrenophora tritici-repentis Pt-1C-BFP hydroxymethylglutaryl-CoA lyase, mRNA	RYO54375.1	543	E:0	hypothetical protein AA0116_g10032 [Alternaria tenuissima]	PF00682.19	HMGL-like	HMGL-like	COG0119	Catalyzes the condensation of the acetyl group of acetyl-CoA with 3-methyl-2-oxobutanoate (2-oxoisovalerate) to form 3-carboxy-3-hydroxy-4-methylpentanoate (2-isopropylmalate) (By similarity)	GO:0008300|isoprenoid catabolic process;GO:0046951|ketone body biosynthetic process;GO:0006552|leucine catabolic process;GO:0006629|lipid metabolic process;GO:0046247|terpene catabolic process	GO:0047445|3-hydroxy-3-isohexenylglutaryl-CoA lyase activity;GO:0004419|hydroxymethylglutaryl-CoA lyase activity;GO:0046872|metal ion bindingGO:0003824|catalytic activity	.	K01640|E4.1.3.4, HMGCL, hmgL; hydroxymethylglutaryl-CoA lyase [EC:4.1.3.4]	map00280|Valine, leucine and isoleucine degradation;map00281|Geraniol degradation;map00650|Butanoate metabolism;map04146|Peroxisome;map00072|Synthesis and degradation of ketone bodies;map01100|Metabolic pathways
evm.model.contig9.401	Protein.evm.model.contig9.401::evm.model.contig9.401	1036808-1038327[+]	gi|918801389|ref|XM_013568780.1|	359	E:5e-96	Aureobasidium namibiae CBS 147.97 serine carboxypeptidase partial mRNA	RYN77357.1	959	E:0	putative serine carboxypeptidase [Alternaria alternata]	PF00450.22	Peptidase_S10	Serine carboxypeptidase	COG2939	carboxy-peptidase	GO:0006508|proteolysis	GO:0004185|serine-type carboxypeptidase activityGO:0004185|serine-type carboxypeptidase activity	GO:0005576|extracellular region	K01288|KEX1; carboxypeptidase D [EC:3.4.16.6]	.
evm.model.contig2.2158	Protein.evm.model.contig2.2158::evm.model.contig2.2158	5496396-5497632[-]	gi|928528729|ref|XM_014227687.1|	780	E:0	Bipolaris maydis ATCC 48331 hypothetical protein partial mRNA	RYN26349.1	703	E:0	hypothetical protein AA0115_g7272 [Alternaria tenuissima]	PF08390.11	TRAM1	TRAM1-like protein	COG5058	ceramide synthase	.	GO:0016740|transferase activity	GO:0016021|integral component of membraneGO:0016021|integral component of membrane	K04709|LAG1; Acyl-CoA-dependent ceramide synthase [EC:2.3.1.24]	map01100|Metabolic pathways;map00600|Sphingolipid metabolism
evm.model.contig7.357	Protein.evm.model.contig7.357::evm.model.contig7.357	904762-909815[+]	gi|189190371|ref|XM_001931490.1|	675	E:0	Pyrenophora tritici-repentis Pt-1C-BFP vacuolar protein sorting-associated protein 45, mRNA	RYO57125.1	2330	E:0	Vacuolar protein sorting-associated protein 45 [Alternaria arborescens]	PF00995.23	Sec1	Sec1 family	COG5158	Vacuolar Protein	GO:0015031|protein transport;GO:0006904|vesicle docking involved in exocytosisGO:0006904|vesicle docking involved in exocytosis;GO:0016192|vesicle-mediated transport	.	GO:0010008|endosome membrane;GO:0005794|Golgi apparatus;GO:0000139|Golgi membrane;GO:0016021|integral component of membrane;GO:0008021|synaptic vesicle	K12479|VPS45; vacuolar protein sorting-associated protein 45	map04144|Endocytosis
evm.model.contig1.1922	Protein.evm.model.contig1.1922::evm.model.contig1.1922	4805325-4807288[-]	gi|636585918|ref|XM_008026107.1|	436	E:2e-119	Setosphaeria turcica Et28A hypothetical protein mRNA	XP_018384167.1	512	E:1e-179	sugar isomerase [Alternaria alternata]	PF00583.25	Acetyltransf_1	Acetyltransferase (GNAT) family	COG0517	Catalyzes the conversion of inosine 5'-phosphate (IMP) to xanthosine 5'-phosphate (XMP), the first committed and rate- limiting step in the de novo synthesis of guanine nucleotides, and therefore plays an important role in the regulation of cell growth (By similarity)	GO:0019294|keto-3-deoxy-D-manno-octulosonic acid biosynthetic processGO:1901135|carbohydrate derivative metabolic process	GO:0019146|arabinose-5-phosphate isomerase activity;GO:0097367|carbohydrate derivative bindingGO:0097367|carbohydrate derivative binding	.	K06041|kdsD, kpsF; arabinose-5-phosphate isomerase [EC:5.3.1.13]	map00540|Lipopolysaccharide biosynthesis;map01100|Metabolic pathways
evm.model.contig1.1916	Protein.evm.model.contig1.1916::evm.model.contig1.1916	4792429-4793152[-]	gi|628070146|ref|XM_007701537.1|	82.4	E:3e-13	Cochliobolus sativus ND90Pr hypothetical protein partial mRNA	RYN78633.1	192	E:1e-56	Serine/threonine-protein phosphatase 2A activator 1 [Alternaria alternata]	PF03095.15	PTPA	Phosphotyrosyl phosphate activator (PTPA) protein	COG5057	PPIases accelerate the folding of proteins. It catalyzes the cis-trans isomerization of proline imidic peptide bonds in oligopeptides. Acts as a regulatory subunit for PP2A-like phosphatases modulating their activity or substrate specificity, probably by inducing a conformational change in the catalytic subunit, a direct target of the PPIase. Can reactivate inactive phosphatase PP2A-phosphatase m…	.	GO:0003755|peptidyl-prolyl cis-trans isomerase activity;GO:0019211|phosphatase activator activityGO:0019211|phosphatase activator activity	GO:0005737|cytoplasm;GO:0005634|nucleus	K17605|PPP2R4, PTPA; serine/threonine-protein phosphatase 2A activator	map04931|Insulin resistance
evm.model.contig2.338	Protein.evm.model.contig2.338::evm.model.contig2.338	984972-986267[-]	gi|636595418|ref|XM_008030857.1|	702	E:0	Setosphaeria turcica Et28A hypothetical protein mRNA	XP_018384560.1	649	E:0	serine/threonine-protein kinase YPK2/YKR2 [Alternaria alternata]	PF00069.25	Pkinase	Protein kinase domain	ENOG410XPQQ	CAMP-dependent protein kinase, catalytic subunit	GO:0007476|imaginal disc-derived wing morphogenesis;GO:0018105|peptidyl-serine phosphorylation;GO:0006468|protein phosphorylation;GO:0007165|signal transductionGO:0006468|protein phosphorylation	GO:0005524|ATP binding;GO:0004691|cAMP-dependent protein kinase activityGO:0004672|protein kinase activity;GO:0005524|ATP binding	GO:0005952|cAMP-dependent protein kinase complex;GO:0005829|cytosol	K19584|PRKX; protein kinase X [EC:2.7.11.11]	.
evm.model.contig4.35	Protein.evm.model.contig4.35::evm.model.contig4.35	105885-107348[-]	gi|928530665|ref|XM_014228655.1|	403	E:2e-109	Bipolaris maydis ATCC 48331 hypothetical protein mRNA	RYN16859.1	613	E:0	hypothetical protein AA0112_g12318 [Alternaria arborescens]	PF01699.24	Na_Ca_ex	Sodium/calcium exchanger protein	COG0387	Calcium Proton	GO:0070588|calcium ion transmembrane transport;GO:0006874|cellular calcium ion homeostasisGO:0055085|transmembrane transport	GO:0015369|calcium:proton antiporter activity	GO:0016021|integral component of membrane;GO:0009705|plant-type vacuole membraneGO:0016021|integral component of membrane	K07300|chaA, CAX; Ca2+:H+ antiporter	.
evm.model.contig3.710	Protein.evm.model.contig3.710::evm.model.contig3.710	1844557-1846325[-]	gi|628205595|ref|XM_007713752.1|	545	E:4e-152	Bipolaris zeicola 26-R-13 hypothetical protein partial mRNA	XP_018388491.1	807	E:0	carboxypeptidase cpdS precursor [Alternaria alternata]	PF00450.22	Peptidase_S10	Serine carboxypeptidase	COG2939	carboxy-peptidase	GO:0006508|proteolysis	GO:0004185|serine-type carboxypeptidase activityGO:0004185|serine-type carboxypeptidase activity	GO:0005576|extracellular region	K01288|KEX1; carboxypeptidase D [EC:3.4.16.6]	.
evm.model.contig2.174	Protein.evm.model.contig2.174::evm.model.contig2.174	556410-558204[+]	gi|189191243|ref|XM_001931926.1|	732	E:0	Pyrenophora tritici-repentis Pt-1C-BFP choline sulfatase, mRNA	RYO32317.1	1036	E:0	Choline-sulfatase [Alternaria arborescens]	PF00884.23	Sulfatase	Sulfatase	COG3119	Sulfatase	GO:0042425|choline biosynthetic process	GO:0047753|choline-sulfatase activity;GO:0046872|metal ion bindingGO:0008484|sulfuric ester hydrolase activity;GO:0003824|catalytic activity	.	K01133|betC; choline-sulfatase [EC:3.1.6.6]	map00140|Steroid hormone biosynthesis;map00600|Sphingolipid metabolism
evm.model.contig5.332	Protein.evm.model.contig5.332::evm.model.contig5.332	896961-900262[-]	gi|928525181|ref|XM_014225913.1|	1362	E:0	Bipolaris maydis ATCC 48331 hypothetical protein mRNA	OWY43689.1	1775	E:0	dipeptidyl aminopeptidase b [Alternaria alternata]	PF00930.21	DPPIV_N	Dipeptidyl peptidase IV (DPP IV) N-terminal region	COG1506	peptidase s9 prolyl oligopeptidase active site domain protein	GO:0006508|proteolysis	GO:0004177|aminopeptidase activity;GO:0008236|serine-type peptidase activityGO:0008236|serine-type peptidase activity	GO:0016021|integral component of membrane;GO:0005774|vacuolar membrane	K01282|E3.4.14.-; dipeptidyl aminopeptidase [EC:3.4.14.-]	.
evm.model.contig8.197	Protein.evm.model.contig8.197::evm.model.contig8.197	602789-605022[+]	gi|636586180|ref|XM_008026238.1|	200	E:3e-48	Setosphaeria turcica Et28A hypothetical protein mRNA	RYO54832.1	957	E:0	hypothetical protein AA0116_g9896 [Alternaria tenuissima]	PF00312.22	Ribosomal_S15	Ribosomal protein S15	ENOG410XX2Y	NA	GO:0006412|translation	GO:0008080|N-acetyltransferase activityGO:0003735|structural constituent of ribosome	GO:0005622|intracellular;GO:0005840|ribosome	K03790|rimJ; ribosomal-protein-alanine N-acetyltransferase [EC:2.3.1.128]	.
evm.model.contig3.565	Protein.evm.model.contig3.565::evm.model.contig3.565	1465051-1466056[+]	gi|636590436|ref|XM_008028366.1|	272	E:4e-70	Setosphaeria turcica Et28A hypothetical protein partial mRNA	RYN58516.1	602	E:0	hypothetical protein AA0118_g7181 [Alternaria tenuissima]	PF04434.17	SWIM	SWIM zinc finger	ENOG41121N2	zinc ion binding	GO:0006915|apoptotic process;GO:1902043|positive regulation of extrinsic apoptotic signaling pathway via death domain receptors;GO:0000209|protein polyubiquitination	GO:0043621|protein self-association;GO:0061630|ubiquitin protein ligase activity;GO:0004842|ubiquitin-protein transferase activity;GO:0008270|zinc ion bindingGO:0008270|zinc ion binding;GO:0004842|ubiquitin-protein transferase activity	GO:0005680|anaphase-promoting complex	K15716|ZSWIM2; E3 ubiquitin-protein ligase ZSWIM2 [EC:2.3.2.27]	.
evm.model.contig1.1636	Protein.evm.model.contig1.1636::evm.model.contig1.1636	4063165-4063961[+]	gi|189208415|ref|XM_001940506.1|	571	E:2e-160	Pyrenophora tritici-repentis Pt-1C-BFP ADP-ribosylation factor, mRNA	OWY42323.1	346	E:2e-119	ADP-ribosylation factor [Alternaria alternata]	PF00025.21	Arf	ADP-ribosylation factor family	ENOG410XRG9	ADP-ribosylation factor-like	GO:0034333|adherens junction assembly;GO:0070830|bicellular tight junction assembly;GO:0007098|centrosome cycle;GO:0051457|maintenance of protein location in nucleus;GO:0034260|negative regulation of GTPase activity;GO:0010811|positive regulation of cell-substrate adhesion;GO:0031116|positive regulation of microtubule polymerization	GO:0019003|GDP binding;GO:0005525|GTP binding;GO:0003924|GTPase activityGO:0005525|GTP binding;GO:0003924|GTPase activity	GO:0005813|centrosome;GO:0005737|cytoplasm;GO:0005829|cytosol;GO:0005925|focal adhesion;GO:0005794|Golgi apparatus;GO:0016328|lateral plasma membrane;GO:0015630|microtubule cytoskeleton;GO:0005758|mitochondrial intermembrane space;GO:0005739|mitochondrion;GO:0005730|nucleolus;GO:0005634|nucleus	K07943|ARL2; ADP-ribosylation factor-like protein 2	.
evm.model.contig7.791	Protein.evm.model.contig7.791::evm.model.contig7.791	2000796-2002586[+]	gi|702073677|emb|FO906024.1|	592	E:5e-166	Leptosphaeria maculans brassicae jn3_SuperContig_9 complete sequence	RYN92910.1	911	E:0	hypothetical protein AA0120_g4817 [Alternaria tenuissima]	PF00501.28	AMP-binding	AMP-binding enzyme	COG0318	Amp-dependent synthetase and ligase	GO:0009698|phenylpropanoid metabolic process	GO:0016207|4-coumarate-CoA ligase activity;GO:0005524|ATP bindingGO:0003824|catalytic activity	.	K01904|4CL; 4-coumarate--CoA ligase [EC:6.2.1.12]	map00130|Ubiquinone and other terpenoid-quinone biosynthesis;map01110|Biosynthesis of secondary metabolites;map01100|Metabolic pathways;map00940|Phenylpropanoid biosynthesis;map00360|Phenylalanine metabolism
evm.model.contig2.151	Protein.evm.model.contig2.151::evm.model.contig2.151	481512-482204[-]	gi|928524131|ref|XM_014225388.1|	665	E:0	Bipolaris maydis ATCC 48331 hypothetical protein partial mRNA	XP_018384361.1	358	E:2e-123	charged multivesicular body protein 5 [Alternaria alternata]	PF03357.21	Snf7	Snf7	ENOG410XPDA	Charged multivesicular body protein	GO:0071222|cellular response to lipopolysaccharide;GO:0071225|cellular response to muramyl dipeptide;GO:0008333|endosome to lysosome transport;GO:0007040|lysosome organization;GO:0061952|midbody abscission;GO:0007080|mitotic metaphase plate congression;GO:0071985|multivesicular body sorting pathway;GO:0006997|nucleus organization;GO:0015031|protein transport;GO:0010824|regulation of centrosome du…	.	GO:0005829|cytosol;GO:0010008|endosome membrane;GO:0005634|nucleus	K12198|CHMP5, VPS60; charged multivesicular body protein 5	map04144|Endocytosis
evm.model.contig3.757	Protein.evm.model.contig3.757::evm.model.contig3.757	1969254-1970742[-]	gi|189199669|ref|XM_001936137.1|	520	E:2e-144	Pyrenophora tritici-repentis Pt-1C-BFP hypothetical protein, mRNA	OWY52702.1	593	E:0	RA-like protein [Alternaria alternata]	PF00536.30	SAM_1	SAM domain (Sterile alpha motif)	COG0666	Ankyrin Repeat	GO:0035264|multicellular organism growth;GO:1904357|negative regulation of telomere maintenance via telomere lengthening;GO:0090263|positive regulation of canonical Wnt signaling pathway;GO:1904355|positive regulation of telomere capping;GO:0006471|protein ADP-ribosylation;GO:0070213|protein auto-ADP-ribosylation;GO:0070198|protein localization to chromosome, telomeric region;GO:0070212|protein p…	GO:0019899|enzyme binding;GO:0046872|metal ion binding;GO:0003950|NAD+ ADP-ribosyltransferase activity;GO:1990404|protein ADP-ribosylase activity;GO:0047485|protein N-terminus bindingGO:0005515|protein binding	GO:0000781|chromosome, telomeric region;GO:0005737|cytoplasm;GO:0000139|Golgi membrane;GO:0005635|nuclear envelope;GO:0005634|nucleus;GO:0000242|pericentriolar material;GO:0048471|perinuclear region of cytoplasm	K10799|TNKS; tankyrase [EC:2.4.2.30]	.
evm.model.contig9.457	Protein.evm.model.contig9.457::evm.model.contig9.457	1194035-1195721[-]	gi|189191823|ref|XM_001932216.1|	809	E:0	Pyrenophora tritici-repentis Pt-1C-BFP peroxisomal adenine nucleotide transporter 1, mRNA	XP_018382314.1	1055	E:0	mitochondrial carrier [Alternaria alternata]	PF00153.27	Mito_carr	Mitochondrial carrier protein	ENOG410ZNC0	peroxisomal membrane protein	.	GO:0015217|ADP transmembrane transporter activity;GO:0080122|AMP transmembrane transporter activity;GO:0005347|ATP transmembrane transporter activity;GO:0015228|coenzyme A transmembrane transporter activity;GO:0015230|FAD transmembrane transporter activity;GO:0044610|FMN transmembrane transporter activity;GO:0051724|NAD transmembrane transporter activity	GO:0005779|integral component of peroxisomal membrane;GO:0005777|peroxisome	K13354|SLC25A17, PMP34; solute carrier family 25 (peroxisomal adenine nucleotide transporter), member 17	map04146|Peroxisome
evm.model.contig3.462	Protein.evm.model.contig3.462::evm.model.contig3.462	1193010-1193788[-]	gi|628084841|ref|XM_007706081.1|	355	E:2e-95	Cochliobolus sativus ND90Pr hypothetical protein mRNA	XP_014550791.1	210	E:2e-88	hypothetical protein COCVIDRAFT_31560 [Bipolaris victoriae FI3]	PF00171.22	Aldedh	Aldehyde dehydrogenase family	COG1012	Dehydrogenase	GO:0009450|gamma-aminobutyric acid catabolic process;GO:0019477|L-lysine catabolic processGO:0055114|oxidation-reduction process	GO:0047949|glutarate-semialdehyde dehydrogenase (NAD+) activity;GO:0009013|succinate-semialdehyde dehydrogenase [NAD(P)+] activityGO:0016491|oxidoreductase activity	.	K00135|gabD; succinate-semialdehyde dehydrogenase / glutarate-semialdehyde dehydrogenase [EC:1.2.1.16 1.2.1.79 1.2.1.20]	map00650|Butanoate metabolism;map00250|Alanine, aspartate and glutamate metabolism;map00310|Lysine degradation;map01100|Metabolic pathways;map00350|Tyrosine metabolism;map01120|Microbial metabolism in diverse environments;map00030|Pentose phosphate pathway;map01200|Carbon metabolism;map00010|Glycolysis / Gluconeogenesis
evm.model.contig4.714	Protein.evm.model.contig4.714::evm.model.contig4.714	1972209-1975545[+]	gi|628190268|ref|XM_007710252.1|	1214	E:0	Bipolaris zeicola 26-R-13 hypothetical protein partial mRNA	OWY41771.1	1562	E:0	alcohol dehydrogenase 1 [Alternaria alternata]	PF08240.12	ADH_N	Alcohol dehydrogenase GroES-like domain	COG0038	chloride channel	GO:0055114|oxidation-reduction process;GO:0006821|chloride transport;GO:0055085|transmembrane transport	GO:0015297|antiporter activity;GO:0005524|ATP binding;GO:0005247|voltage-gated chloride channel activityGO:0005247|voltage-gated chloride channel activity	GO:0010008|endosome membrane;GO:0000139|Golgi membrane;GO:0016021|integral component of membrane;GO:0005886|plasma membraneGO:0016020|membrane	K05012|CLCN3_4_5; chloride channel 3/4/5	.
evm.model.contig8.538	Protein.evm.model.contig8.538::evm.model.contig8.538	1530952-1532244[+]	gi|928522819|ref|XM_014224732.1|	1160	E:0	Bipolaris maydis ATCC 48331 hypothetical protein partial mRNA	RII08953.1	677	E:0	hypothetical protein CUC08_Gglean007349 [Alternaria sp. MG1]	PF11786.8	Aft1_HRA	Aft1 HRA domain	ENOG4111CH5	Transcription factor	GO:0006355|regulation of transcription, DNA-templated	GO:0003677|DNA binding;GO:0003700|DNA-binding transcription factor activity;GO:0046872|metal ion bindingGO:0003700|DNA-binding transcription factor activity	GO:0034399|nuclear periphery;GO:0005654|nucleoplasm	K09045|ATF7, ATFA; activating transcription factor 7	.
evm.model.contig1.823	Protein.evm.model.contig1.823::evm.model.contig1.823	2024748-2027272[+]	gi|636596906|ref|XM_008031601.1|	774	E:0	Setosphaeria turcica Et28A hypothetical protein partial mRNA	XP_018389761.1	1233	E:0	kinase-like protein [Alternaria alternata]	PF00069.25	Pkinase	Protein kinase domain	ENOG410XPAX	PRP4 pre-mRNA processing factor 4 homolog B (yeast)	GO:0006397|mRNA processing;GO:0006468|protein phosphorylation;GO:0008380|RNA splicingGO:0006468|protein phosphorylation	GO:0005524|ATP binding;GO:0004672|protein kinase activity;GO:0004674|protein serine/threonine kinase activityGO:0004672|protein kinase activity;GO:0005524|ATP binding	GO:0071013|catalytic step 2 spliceosome;GO:0005694|chromosome;GO:0016607|nuclear speck;GO:0005634|nucleus	K08827|PRPF4B; serine/threonine-protein kinase PRP4 [EC:2.7.11.1]	.
evm.model.contig8.152	Protein.evm.model.contig8.152::evm.model.contig8.152	441432-442647[+]	gi|636580388|ref|XM_008023342.1|	937	E:0	Setosphaeria turcica Et28A hypothetical protein partial mRNA	XP_018381003.1	726	E:0	NAD(P)-binding protein [Alternaria alternata]	PF01408.22	GFO_IDH_MocA	Oxidoreductase family, NAD-binding Rossmann fold	COG0673	oxidoreductase	GO:1902141|cellular response to inositol;GO:0019310|inositol catabolic process;GO:0006740|NADPH regeneration	GO:0070403|NAD+ binding;GO:0070404|NADH binding;GO:0016491|oxidoreductase activity;GO:0016616|oxidoreductase activity, acting on the CH-OH group of donors, NAD or NADP as acceptorGO:0016491|oxidoreductase activity	.	K16043|iolX; scyllo-inositol 2-dehydrogenase (NAD+) [EC:1.1.1.370]	map00562|Inositol phosphate metabolism;map01120|Microbial metabolism in diverse environments
evm.model.contig1.2373	Protein.evm.model.contig1.2373::evm.model.contig1.2373	6057263-6059036[+]	gi|636585824|ref|XM_008026060.1|	582	E:3e-163	Setosphaeria turcica Et28A hypothetical protein partial mRNA	RYN35034.1	852	E:0	putative amidase [Alternaria tenuissima]	PF01425.21	Amidase	Amidase	COG0154	Allows the formation of correctly charged Gln-tRNA(Gln) through the transamidation of misacylated Glu-tRNA(Gln) in organisms which lack glutaminyl-tRNA synthetase. The reaction takes place in the presence of glutamine and ATP through an activated gamma-phospho-Glu-tRNA(Gln) (By similarity)	.	GO:0016787|hydrolase activity	GO:0005576|extracellular region	K01426|E3.5.1.4, amiE; amidase [EC:3.5.1.4]	map00627|Aminobenzoate degradation;map00643|Styrene degradation;map00330|Arginine and proline metabolism;map00360|Phenylalanine metabolism;map00380|Tryptophan metabolism;map01120|Microbial metabolism in diverse environments
evm.model.contig1.1048	Protein.evm.model.contig1.1048::evm.model.contig1.1048	2547995-2549043[-]	gi|189204911|ref|XM_001938756.1|	318	E:4e-84	Pyrenophora tritici-repentis Pt-1C-BFP tRNA-specific adenosine deaminase subunit TAD2, mRNA	RYO42661.1	267	E:1e-85	hypothetical protein AA0113_g10904 [Alternaria arborescens]	PF00090.19	TSP_1	Thrombospondin type 1 domain	COG0590	deaminase	GO:0006400|tRNA modification;GO:0002100|tRNA wobble adenosine to inosine editingGO:0002100|tRNA wobble adenosine to inosine editing	GO:0052717|tRNA-specific adenosine-34 deaminase activity;GO:0008270|zinc ion bindingGO:0008251|tRNA-specific adenosine deaminase activity	GO:0005654|nucleoplasm;GO:0052718|tRNA-specific adenosine-34 deaminase complex	K15441|TAD2, ADAT2; tRNA-specific adenosine deaminase 2 [EC:3.5.4.-]	.
evm.model.contig8.106	Protein.evm.model.contig8.106::evm.model.contig8.106	308285-309687[-]	gi|189200329|ref|XM_001936467.1|	427	E:7e-117	Pyrenophora tritici-repentis Pt-1C-BFP plastidic glucose transporter 4, mRNA	XP_018380953.1	303	E:1e-95	hypothetical protein CC77DRAFT_448659 [Alternaria alternata]	PF00083.24	Sugar_tr	Sugar (and other) transporter	ENOG410XNQK	Transporter	GO:0015798|myo-inositol transportGO:0055085|transmembrane transport	GO:0005366|myo-inositol:proton symporter activityGO:0022857|transmembrane transporter activity	GO:0005829|cytosol;GO:0016021|integral component of membrane;GO:0009705|plant-type vacuole membrane;GO:0005773|vacuoleGO:0016021|integral component of membrane	K08150|SLC2A13, ITR; MFS transporter, SP family, solute carrier family 2 (myo-inositol transporter), member 13	.
evm.model.contig6.380	Protein.evm.model.contig6.380::evm.model.contig6.380	1019768-1021668[-]	gi|189195257|ref|XM_001933932.1|	737	E:0	Pyrenophora tritici-repentis Pt-1C-BFP delta 8-(E)-sphingolipid desaturase, mRNA	PZD30550.1	769	E:0	DesA, Fatty acid desaturase [Pyrenophora tritici-repentis]	PF00173.28	Cyt-b5	Cytochrome b5-like Heme/Steroid binding domain	ENOG410XVSZ	Fatty acid desaturase	GO:0006665|sphingolipid metabolic processGO:0006629|lipid metabolic process	GO:0046872|metal ion binding;GO:0016491|oxidoreductase activity	GO:0016021|integral component of membrane	K13076|SLD; delta8-fatty-acid desaturase [EC:1.14.19.4]	.
evm.model.contig9.777	Protein.evm.model.contig9.777::evm.model.contig9.777	2104646-2109397[-]	gi|702073526|emb|FO905900.1|	117	E:5e-23	Leptosphaeria biglobosa Thlaspii ibcn65_scaffold00001 complete sequence	RII22682.1	650	E:0	hypothetical protein CUC08_Gglean013597 [Alternaria sp. MG1]	PF08641.12	Mis14	Kinetochore protein Mis14 like	COG1252	Nadh dehydrogenase	GO:0000070|mitotic sister chromatid segregation;GO:0055114|oxidation-reduction process	GO:0003954|NADH dehydrogenase activityGO:0016491|oxidoreductase activity	GO:0000776|kinetochore	K17871|ndh1; NADH:ubiquinone reductase (non-electrogenic) [EC:1.6.5.9]	.
evm.model.contig1.1770	Protein.evm.model.contig1.1770::evm.model.contig1.1770	4439825-4444408[+]	gi|702073522|emb|FO905896.1|	185	E:1e-43	Leptosphaeria biglobosa Thlaspii ibcn65_scaffold00005 complete sequence	OWY42453.1	797	E:0	xaa-pro dipeptidase [Alternaria alternata]	PF00557.24	Peptidase_M24	Metallopeptidase family M24	ENOG410XP18	Poly (ADP-ribose) polymerase	GO:0055085|transmembrane transport	GO:0004177|aminopeptidase activity;GO:0030145|manganese ion binding;GO:0008237|metallopeptidase activityGO:0022857|transmembrane transporter activity	GO:0016021|integral component of membrane	K14213|PEPD; Xaa-Pro dipeptidase [EC:3.4.13.9]	.
evm.model.contig1.1939	Protein.evm.model.contig1.1939::evm.model.contig1.1939	4853091-4854532[+]	gi|189201638|ref|XM_001937121.1|	885	E:0	Pyrenophora tritici-repentis Pt-1C-BFP NAD-dependent methanol dehydrogenase, mRNA	RYN46511.1	536	E:0	Hydroxyacid-oxoacid transhydrogenase [Alternaria tenuissima]	PF00465.19	Fe-ADH	Iron-containing alcohol dehydrogenase	COG1454	alcohol dehydrogenase	GO:0006539|glutamate catabolic process via 2-oxoglutarateGO:0055114|oxidation-reduction process	GO:0004022|alcohol dehydrogenase (NAD) activity;GO:0047988|hydroxyacid-oxoacid transhydrogenase activity;GO:0046872|metal ion bindingGO:0016491|oxidoreductase activity;GO:0046872|metal ion binding	GO:0005739|mitochondrion	K11173|ADHFE1; hydroxyacid-oxoacid transhydrogenase [EC:1.1.99.24]	.
evm.model.contig6.91	Protein.evm.model.contig6.91::evm.model.contig6.91	229715-230635[-]	gi|169615063|ref|XM_001800896.1|	475	E:3e-131	Phaeosphaeria nodorum SN15 hypothetical protein partial mRNA	RYN77135.1	545	E:0	hypothetical protein AA0120_g11544 [Alternaria tenuissima]	PF12796.7	Ank_2	Ankyrin repeats (3 copies)	COG0666	Ankyrin Repeat	GO:0001955|blood vessel maturation;GO:0042742|defense response to bacterium;GO:0007492|endoderm development;GO:0045087|innate immune response;GO:0051151|negative regulation of smooth muscle cell differentiation;GO:0045787|positive regulation of cell cycle;GO:1900087|positive regulation of G1/S transition of mitotic cell cycle;GO:0043123|positive regulation of I-kappaB kinase/NF-kappaB signaling;G…	GO:0003682|chromatin binding;GO:0003723|RNA bindingGO:0005515|protein binding	GO:0000785|chromatin;GO:0005737|cytoplasm;GO:0031965|nuclear membrane;GO:0005634|nucleus	K16726|ANKRD17, MASK; ankyrin repeat domain-containing protein 17	.
evm.model.contig2.822	Protein.evm.model.contig2.822::evm.model.contig2.822	2090904-2091215[+]	gi|189211045|ref|XM_001941819.1|	171	E:3e-40	Pyrenophora tritici-repentis Pt-1C-BFP neural precursor cell expressed, mRNA	RII21848.1	144	E:4e-43	hypothetical protein CUC08_Gglean001017 [Alternaria sp. MG1]	PF14560.6	Ubiquitin_2	Ubiquitin-like domain	COG5272	ubiquitin	GO:0008283|cell population proliferation;GO:0036099|female germ-line stem cell population maintenance;GO:0019941|modification-dependent protein catabolic process;GO:0007275|multicellular organism development;GO:0045116|protein neddylation;GO:0031647|regulation of protein stability;GO:0030162|regulation of proteolysis;GO:0008589|regulation of smoothened signaling pathway;GO:2000736|regulation of s…	GO:0031386|protein tag;GO:0031625|ubiquitin protein ligase bindingGO:0005515|protein binding	GO:0005737|cytoplasm;GO:0005634|nucleus	K12158|NEDD8; ubiquitin-like protein Nedd8	.
evm.model.contig6.749	Protein.evm.model.contig6.749::evm.model.contig6.749	1984931-1988353[-]	gi|627918057|ref|XM_007694005.1|	599	E:5e-168	Bipolaris oryzae ATCC 44560 hypothetical protein partial mRNA	OWY49243.1	1930	E:0	DNA repair protein rad5 [Alternaria alternata]	PF00176.23	SNF2_N	SNF2 family N-terminal domain	ENOG410XPDU	Transcription termination factor, RNA polymerase II	GO:0006325|chromatin organization;GO:0006281|DNA repair	GO:0005524|ATP binding;GO:0004386|helicase activity;GO:0003676|nucleic acid binding;GO:0008270|zinc ion bindingGO:0005524|ATP binding	GO:0009941|chloroplast envelope;GO:0005634|nucleus	K15505|RAD5; DNA repair protein RAD5 [EC:3.6.4.-]	.
evm.model.contig1.1545	Protein.evm.model.contig1.1545::evm.model.contig1.1545	3777674-3778857[+]	gi|628193144|ref|XM_007710951.1|	1016	E:0	Bipolaris zeicola 26-R-13 hypothetical protein partial mRNA	XP_018389530.1	659	E:0	oxidoreductase-like protein [Alternaria alternata]	PF00478.25	IMPDH	IMP dehydrogenase / GMP reductase domain	COG2070	2-Nitropropane dioxygenase	GO:0009636|response to toxic substanceGO:0055114|oxidation-reduction process	GO:0018580|nitronate monooxygenase activity;GO:0000166|nucleotide bindingGO:0003824|catalytic activity;GO:0018580|nitronate monooxygenase activity	.	K00459|ncd2, npd; nitronate monooxygenase [EC:1.13.12.16]	map00910|Nitrogen metabolism
evm.model.contig3.596	Protein.evm.model.contig3.596::evm.model.contig3.596	1552020-1554099[-]	gi|189188253|ref|XM_001930431.1|	688	E:0	Pyrenophora tritici-repentis Pt-1C-BFP glycogenin-2, mRNA	OWY52548.1	1069	E:0	beta-Ala-His dipeptidase [Alternaria alternata]	PF01501.20	Glyco_transf_8	Glycosyl transferase family 8	COG5597	Glycosyl Transferase	GO:0005978|glycogen biosynthetic process	GO:0008466|glycogenin glucosyltransferase activity;GO:0046872|metal ion binding;GO:0102751|UDP-alpha-D-glucose:glucosyl-glycogenin alpha-D-glucosyltransferase activityGO:0016757|transferase activity, transferring glycosyl groups	GO:0005737|cytoplasm;GO:0055120|striated muscle dense body	K00750|GYG1, GYG2; glycogenin glucosyltransferase [EC:2.4.1.186]	.
evm.model.contig9.502	Protein.evm.model.contig9.502::evm.model.contig9.502	1360234-1360992[-]	gi|928518597|ref|XM_014222621.1|	311	E:5e-82	Bipolaris maydis ATCC 48331 hypothetical protein partial mRNA	RYN37152.1	391	E:8e-133	hypothetical protein AA0115_g965 [Alternaria tenuissima]	PF03345.14	DDOST_48kD	Oligosaccharyltransferase 48 kDa subunit beta	ENOG410XSF3	Dolichyl-diphosphooligosaccharide--protein glycosyltransferase	GO:0009664|plant-type cell wall organization;GO:0018279|protein N-linked glycosylation via asparagine;GO:0009826|unidimensional cell growthGO:0018279|protein N-linked glycosylation via asparagine	.	GO:0005783|endoplasmic reticulum;GO:0005794|Golgi apparatus;GO:0016021|integral component of membrane;GO:0005730|nucleolus;GO:0008250|oligosaccharyltransferase complex;GO:0009505|plant-type cell wall;GO:0009506|plasmodesma;GO:0009536|plastid;GO:0005774|vacuolar membrane;GO:0005773|vacuoleGO:0005789|endoplasmic reticulum membrane	K12670|WBP1; oligosaccharyltransferase complex subunit beta	map04141|Protein processing in endoplasmic reticulum;map00513|Various types of N-glycan biosynthesis;map01100|Metabolic pathways;map00510|N-Glycan biosynthesis
evm.model.contig1.945	Protein.evm.model.contig1.945::evm.model.contig1.945	2309141-2310966[-]	gi|628180735|ref|XM_007708070.1|	342	E:5e-91	Bipolaris zeicola 26-R-13 glycoside hydrolase family 32 protein partial mRNA	XP_018389643.1	1011	E:0	sucrose-6-phosphate hydrolase [Alternaria alternata]	PF00251.20	Glyco_hydro_32N	Glycosyl hydrolases family 32 N-terminal domain	COG1621	Hydrolase	GO:0005975|carbohydrate metabolic process	GO:0004564|beta-fructofuranosidase activity	.	K01193|E3.2.1.26, sacA; beta-fructofuranosidase [EC:3.2.1.26]	map01100|Metabolic pathways;map00500|Starch and sucrose metabolism;map00052|Galactose metabolism
evm.model.contig9.579	Protein.evm.model.contig9.579::evm.model.contig9.579	1542828-1544103[+]	gi|928519039|ref|XM_014222842.1|	876	E:0	Bipolaris maydis ATCC 48331 hypothetical protein mRNA	RYO35523.1	771	E:0	putative phosphoketolase 1 [Alternaria gaisen]	PF09364.10	XFP_N	XFP N-terminal domain	COG3957	Phosphoketolase	GO:0005975|carbohydrate metabolic process	GO:0016832|aldehyde-lyase activity	.	K01621|xfp, xpk; xylulose-5-phosphate/fructose-6-phosphate phosphoketolase [EC:4.1.2.9 4.1.2.22]	map01120|Microbial metabolism in diverse environments;map01100|Metabolic pathways;map00710|Carbon fixation in photosynthetic organisms;map00030|Pentose phosphate pathway
evm.model.contig2.956	Protein.evm.model.contig2.956::evm.model.contig2.956	2442887-2443444[+]	gi|636594522|ref|XM_008030409.1|	226	E:2e-56	Setosphaeria turcica Et28A hypothetical protein partial mRNA	XP_018379668.1	352	E:2e-121	alpha-acetolactate decarboxylase [Alternaria alternata]	PF03306.13	AAL_decarboxy	Alpha-acetolactate decarboxylase	COG3527	Alpha-acetolactate decarboxylase	GO:0045151|acetoin biosynthetic processGO:0045151|acetoin biosynthetic process	GO:0047605|acetolactate decarboxylase activityGO:0047605|acetolactate decarboxylase activity	.	K01575|alsD, budA, aldC; acetolactate decarboxylase [EC:4.1.1.5]	map00660|C5-Branched dibasic acid metabolism;map00650|Butanoate metabolism
evm.model.contig1.312	Protein.evm.model.contig1.312::evm.model.contig1.312	771304-773001[+]	gi|628187840|ref|XM_007709659.1|	243	E:6e-61	Bipolaris zeicola 26-R-13 hypothetical protein partial mRNA	RYN36301.1	778	E:0	hypothetical protein AA0115_g1894 [Alternaria tenuissima]	PF11793.8	FANCL_C	FANCL C-terminal domain	ENOG410XSJW	membrane-associated ring finger (C3HC4) 5	GO:0090344|negative regulation of cell aging;GO:0051865|protein autoubiquitination;GO:0090140|regulation of mitochondrial fission	GO:0004842|ubiquitin-protein transferase activity;GO:0008270|zinc ion bindingGO:0008270|zinc ion binding	GO:0005783|endoplasmic reticulum;GO:0005789|endoplasmic reticulum membrane;GO:0016021|integral component of membrane;GO:0005741|mitochondrial outer membrane	K10660|MARCH5; E3 ubiquitin-protein ligase MARCH5 [EC:2.3.2.27]	.
evm.model.contig2.1931	Protein.evm.model.contig2.1931::evm.model.contig2.1931	4934356-4936661[+]	gi|953418812|ref|XM_014695992.1|	145	E:1e-31	Bipolaris victoriae FI3 hypothetical protein partial mRNA	OWY53532.1	807	E:0	hypothetical protein AALT_g12022 [Alternaria alternata]	PF00856.28	SET	SET domain	COG2940	Histone-lysine N-methyltransferase	GO:0071549|cellular response to dexamethasone stimulus;GO:0045184|establishment of protein localization;GO:0014904|myotube cell development;GO:0006469|negative regulation of protein kinase activity;GO:0006334|nucleosome assembly;GO:0033138|positive regulation of peptidyl-serine phosphorylation;GO:0045944|positive regulation of transcription by RNA polymerase II	GO:0018024|histone-lysine N-methyltransferase activity;GO:0046872|metal ion binding;GO:0000993|RNA polymerase II complex binding;GO:0001162|RNA polymerase II intronic transcription regulatory region sequence-specific DNA binding;GO:0000978|RNA polymerase II proximal promoter sequence-specific DNA bindingGO:0005515|protein binding	GO:0005829|cytosol;GO:0005654|nucleoplasm;GO:0005634|nucleus	K11426|SMYD; SET and MYND domain-containing protein	.
evm.model.contig4.390	Protein.evm.model.contig4.390::evm.model.contig4.390	1097765-1098900[+]	gi|189202775|ref|XM_001937689.1|	736	E:0	Pyrenophora tritici-repentis Pt-1C-BFP conserved hypothetical protein, mRNA	XP_018391803.1	697	E:0	glycosyl hydrolase [Alternaria alternata]	PF07470.13	Glyco_hydro_88	Glycosyl Hydrolase Family 88	COG4225	Glycosyl Hydrolase Family 88	GO:0008152|metabolic process	GO:0102211|unsaturated rhamnogalacturonyl hydrolase activity	GO:0005737|cytoplasm	K15532|yteR, yesR; unsaturated rhamnogalacturonyl hydrolase [EC:3.2.1.172]	.
evm.model.contig3.1261	Protein.evm.model.contig3.1261::evm.model.contig3.1261	3368446-3370361[+]	gi|628211070|ref|XM_007714970.1|	616	E:3e-173	Bipolaris zeicola 26-R-13 hypothetical protein partial mRNA	RYN58871.1	845	E:0	hypothetical protein AA0114_g1869 [Alternaria tenuissima]	PF01544.18	CorA	CorA-like Mg2+ transporter protein	COG0598	magnesium and cobalt transport protein CorA	GO:0006824|cobalt ion transport;GO:1903830|magnesium ion transmembrane transport;GO:0051260|protein homooligomerizationGO:0030001|metal ion transport;GO:0055085|transmembrane transport	GO:0050897|cobalt ion binding;GO:0015087|cobalt ion transmembrane transporter activity;GO:0042802|identical protein binding;GO:0000287|magnesium ion binding;GO:0015095|magnesium ion transmembrane transporter activityGO:0046873|metal ion transmembrane transporter activity	GO:0005887|integral component of plasma membraneGO:0016020|membrane	K03284|corA; magnesium transporter	.
evm.model.contig1.1898	Protein.evm.model.contig1.1898::evm.model.contig1.1898	4752924-4756063[+]	gi|189201472|ref|XM_001937038.1|	795	E:0	Pyrenophora tritici-repentis Pt-1C-BFP conserved hypothetical protein, mRNA	RAQ99509.1	815	E:0	P-loop containing nucleoside triphosphate hydrolase protein [Stemphylium lycopersici]	PF00005.27	ABC_tran	ABC transporter	COG0488	(ABC) transporter	GO:0006438|valyl-tRNA aminoacylation	GO:0005524|ATP binding;GO:0016887|ATPase activity;GO:0003677|DNA binding;GO:0004832|valine-tRNA ligase activityGO:0005524|ATP binding;GO:0016887|ATPase activity	GO:0005737|cytoplasm	K06158|ABCF3; ATP-binding cassette, subfamily F, member 3	.
evm.model.contig4.353	Protein.evm.model.contig4.353::evm.model.contig4.353	1005143-1006852[-]	gi|953419038|ref|XM_014696105.1|	957	E:0	Bipolaris victoriae FI3 hypothetical protein partial mRNA	XP_018391844.1	808	E:0	cysteine proteinase [Alternaria alternata]	PF10275.9	Peptidase_C65	Peptidase C65 Otubain	ENOG410ZMN7	OTU domain, ubiquitin aldehyde binding	GO:0002250|adaptive immune response;GO:0006974|cellular response to DNA damage stimulus;GO:0071347|cellular response to interleukin-1;GO:0006281|DNA repair;GO:2000780|negative regulation of double-strand break repair;GO:1901315|negative regulation of histone H2A K63-linked ubiquitination;GO:0016579|protein deubiquitination;GO:0071108|protein K48-linked deubiquitination	GO:0019784|NEDD8-specific protease activity;GO:0004843|thiol-dependent ubiquitin-specific protease activity;GO:0043130|ubiquitin binding;GO:0031625|ubiquitin protein ligase binding	GO:0005829|cytosol;GO:0070062|extracellular exosome;GO:0005654|nucleoplasm;GO:0005634|nucleus	K09602|OTUB1; ubiquitin thioesterase protein OTUB1 [EC:3.4.19.12]	.
evm.model.contig5.1032	Protein.evm.model.contig5.1032::evm.model.contig5.1032	2699604-2701233[+]	gi|702073521|emb|FO905895.1|	156	E:5e-35	Leptosphaeria biglobosa Thlaspii ibcn65_scaffold00006 complete sequence	XP_018387221.1	490	E:3e-167	APG6-domain-containing protein [Alternaria alternata]	PF17675.1	APG6_N	Apg6 coiled-coil region	ENOG410XQ85	beclin 1	GO:0006914|autophagy;GO:0015031|protein transport	.	GO:0010008|endosome membrane;GO:0034045|phagophore assembly site membrane;GO:0005774|vacuolar membrane	K08334|BECN1, VPS30, ATG6; beclin 1	map04140|Regulation of autophagy
evm.model.contig1.550	Protein.evm.model.contig1.550::evm.model.contig1.550	1363626-1366732[+]	gi|189210304|ref|XM_001941449.1|	610	E:2e-171	Pyrenophora tritici-repentis Pt-1C-BFP conserved hypothetical protein, mRNA	XP_001941484.1	649	E:0	conserved hypothetical protein [Pyrenophora tritici-repentis Pt-1C-BFP]	PF05686.12	Glyco_transf_90	Glycosyl transferase family 90	ENOG4111KZD	Glycosyltransferase family 90 protein	GO:0045227|capsule polysaccharide biosynthetic process;GO:0006688|glycosphingolipid biosynthetic process;GO:0009405|pathogenesis	GO:0046527|glucosyltransferase activity;GO:0035252|UDP-xylosyltransferase activity	GO:0016021|integral component of membrane	K11702|CXT1; beta-1,2-xylosyltransferase [EC:2.4.2.-]	.
evm.model.contig9.828	Protein.evm.model.contig9.828::evm.model.contig9.828	2233693-2235021[+]	gi|628230803|ref|XM_007718152.1|	156	E:5e-35	Bipolaris zeicola 26-R-13 hypothetical protein partial mRNA	RYN70928.1	610	E:0	hypothetical protein AA0117_g10043 [Alternaria alternata]	PF09810.9	Exo5	Exonuclease V - a 5' deoxyribonuclease	ENOG4111IID	Exonuclease	GO:0036297|interstrand cross-link repair	GO:0051539|4 iron, 4 sulfur cluster binding;GO:0003677|DNA binding;GO:0046872|metal ion binding;GO:0045145|single-stranded DNA 5'-3' exodeoxyribonuclease activityGO:0045145|single-stranded DNA 5'-3' exodeoxyribonuclease activity	GO:0005829|cytosol;GO:0005654|nucleoplasm;GO:0005634|nucleus	K17815|EXO5; exonuclease V [EC:3.1.-.-]	.
evm.model.contig2.1552	Protein.evm.model.contig2.1552::evm.model.contig2.1552	3967618-3971632[+]	gi|189206214|ref|XM_001939407.1|	972	E:0	Pyrenophora tritici-repentis Pt-1C-BFP ISWI chromatin-remodeling complex ATPase ISW2, mRNA	RYN69323.1	2404	E:0	hypothetical protein AA0117_g10838 [Alternaria alternata]	PF00176.23	SNF2_N	SNF2 family N-terminal domain	COG0553	helicase	GO:0043044|ATP-dependent chromatin remodeling;GO:0016584|nucleosome positioning	GO:0005524|ATP binding;GO:0003677|DNA binding;GO:0008094|DNA-dependent ATPase activity;GO:0004386|helicase activity;GO:0031491|nucleosome bindingGO:0005524|ATP binding;GO:0003677|DNA binding;GO:0016787|hydrolase activity	GO:0005634|nucleus	K11654|SMARCA5, SNF2H, ISWI; SWI/SNF-related matrix-associated actin-dependent regulator of chromatin subfamily A member 5 [EC:3.6.4.-]	.
evm.model.contig2.356	Protein.evm.model.contig2.356::evm.model.contig2.356	1016963-1019620[-]	gi|928509812|ref|XM_014218235.1|	678	E:0	Bipolaris maydis ATCC 48331 hypothetical protein partial mRNA	OWY46494.1	519	E:8e-173	cation efflux protein [Alternaria alternata]	PF01545.21	Cation_efflux	Cation efflux family	COG1230	cation diffusion facilitator family transporter	GO:0006882|cellular zinc ion homeostasis;GO:0006824|cobalt ion transport;GO:0010043|response to zinc ion;GO:0006829|zinc ion transportGO:0006812|cation transport;GO:0055085|transmembrane transport	GO:0005385|zinc ion transmembrane transporter activityGO:0008324|cation transmembrane transporter activity	GO:0016324|apical plasma membrane;GO:0005794|Golgi apparatus;GO:0016021|integral component of membrane;GO:0016020|membrane;GO:0005730|nucleolus;GO:0005634|nucleus;GO:0030141|secretory granuleGO:0016021|integral component of membrane	K14692|SLC30A5_7, ZNT5_7, MTP, MSC2; solute carrier family 30 (zinc transporter), member 5/7	.
evm.model.contig4.322	Protein.evm.model.contig4.322::evm.model.contig4.322	914315-918042[-]	gi|628336235|ref|XM_007747766.1|	342	E:9e-91	Cladophialophora psammophila CBS 110553 hypothetical protein partial mRNA	RYN56090.1	1481	E:0	hypothetical protein AA0118_g8384 [Alternaria tenuissima]	PF03033.20	Glyco_transf_28	Glycosyltransferase family 28 N-terminal domain	COG1819	Transferase	GO:0005975|carbohydrate metabolic process;GO:0009813|flavonoid biosynthetic process;GO:0030259|lipid glycosylation;GO:0010214|seed coat development;GO:0009845|seed germination;GO:0016126|sterol biosynthetic process;GO:0016125|sterol metabolic processGO:0005975|carbohydrate metabolic process;GO:0030259|lipid glycosylation	GO:0102203|brassicasterol glucosyltransferase activity;GO:0102205|cholesterol allpha-glucosyltransferase activity;GO:0102202|soladodine glucosyltransferase activity;GO:0016906|sterol 3-beta-glucosyltransferase activity;GO:0008194|UDP-glycosyltransferase activityGO:0016758|transferase activity, transferring hexosyl groups	GO:0043231|intracellular membrane-bounded organelle;GO:0005774|vacuolar membrane;GO:0005773|vacuole	K05841|E2.4.1.173; sterol 3beta-glucosyltransferase [EC:2.4.1.173]	.
evm.model.contig2.969	Protein.evm.model.contig2.969::evm.model.contig2.969	2472143-2474657[-]	gi|953435286|ref|XM_014704229.1|	165	E:2e-37	Bipolaris victoriae FI3 hypothetical protein partial mRNA	XP_018379681.1	1661	E:0	hypothetical protein CC77DRAFT_949185 [Alternaria alternata]	PF17681.1	GCP_N_terminal	Gamma tubulin complex component N-terminal	ENOG410ZYW9	Tubulin, gamma complex associated protein 5	GO:0031122|cytoplasmic microtubule organization;GO:0051321|meiotic cell cycle;GO:0007020|microtubule nucleation;GO:0051415|microtubule nucleation by interphase microtubule organizing center;GO:0000278|mitotic cell cycle;GO:0051225|spindle assembly	GO:0043015|gamma-tubulin binding;GO:0008017|microtubule bindingGO:0043015|gamma-tubulin binding	GO:0005813|centrosome;GO:0005829|cytosol;GO:0000923|equatorial microtubule organizing center;GO:0000930|gamma-tubulin complex;GO:0008274|gamma-tubulin ring complex;GO:0005874|microtubule;GO:0000922|spindle pole	K16572|TUBGCP5, GCP5; gamma-tubulin complex component 5	.
evm.model.contig10.375	Protein.evm.model.contig10.375::evm.model.contig10.375	943727-944801[-]	gi|627834618|ref|XM_007689753.1|	303	E:1e-79	Bipolaris oryzae ATCC 44560 glycoside hydrolase family 105 protein partial mRNA	XP_028505974.1	573	E:0	hypothetical protein AA0111_g6332 [Alternaria arborescens]	PF07470.13	Glyco_hydro_88	Glycosyl Hydrolase Family 88	COG4225	Glycosyl Hydrolase Family 88	GO:0008152|metabolic process	GO:0102211|unsaturated rhamnogalacturonyl hydrolase activity	GO:0005737|cytoplasm	K15532|yteR, yesR; unsaturated rhamnogalacturonyl hydrolase [EC:3.2.1.172]	.
evm.model.contig2.1349	Protein.evm.model.contig2.1349::evm.model.contig2.1349	3454533-3455377[+]	gi|953441108|ref|XM_014707140.1|	693	E:0	Bipolaris victoriae FI3 hypothetical protein partial mRNA	XP_018385598.1	395	E:4e-138	ras-domain-containing protein [Alternaria alternata]	PF00025.21	Arf	ADP-ribosylation factor family	ENOG410XPBI	member RAS oncogene family	GO:0006891|intra-Golgi vesicle-mediated transport;GO:0006886|intracellular protein transport;GO:0032482|Rab protein signal transduction;GO:0042147|retrograde transport, endosome to Golgi;GO:0006890|retrograde vesicle-mediated transport, Golgi to endoplasmic reticulum	GO:0005525|GTP binding;GO:0003924|GTPase activity;GO:0031489|myosin V bindingGO:0005525|GTP binding;GO:0003924|GTPase activity	GO:0031410|cytoplasmic vesicle;GO:0005829|cytosol;GO:0005793|endoplasmic reticulum-Golgi intermediate compartment;GO:0005794|Golgi apparatus;GO:0000139|Golgi membrane;GO:0098793|presynapse	K07894|RAB6B; Ras-related protein Rab-6B	.
evm.model.contig2.179	Protein.evm.model.contig2.179::evm.model.contig2.179	568432-570391[+]	gi|628059578|ref|XM_007697753.1|	669	E:0	Cochliobolus sativus ND90Pr hypothetical protein partial mRNA	RII22337.1	1164	E:0	hypothetical protein CUC08_Gglean000123 [Alternaria sp. MG1]	PF01019.21	G_glu_transpept	Gamma-glutamyltranspeptidase	COG0405	gamma-glutamyltransferase activity	GO:0006751|glutathione catabolic process	GO:0036374|glutathione hydrolase activity;GO:0102953|hypoglycin A gamma-glutamyl transpeptidase activity;GO:0103068|leukotriene C4 gamma-glutamyl transferase activity	.	K00681|ggt; gamma-glutamyltranspeptidase / glutathione hydrolase [EC:2.3.2.2 3.4.19.13]	map01100|Metabolic pathways;map00480|Glutathione metabolism;map00430|Taurine and hypotaurine metabolism;map00460|Cyanoamino acid metabolism
evm.model.contig1.122	Protein.evm.model.contig1.122::evm.model.contig1.122	316658-317673[-]	gi|189205075|ref|XM_001938838.1|	625	E:3e-176	Pyrenophora tritici-repentis Pt-1C-BFP 3-hydroxybutyryl-CoA dehydrogenase, mRNA	XP_018381675.1	530	E:0	hypothetical protein CC77DRAFT_1024138 [Alternaria alternata]	PF02737.18	3HCDH_N	3-hydroxyacyl-CoA dehydrogenase, NAD binding domain	COG1250	Dehydrogenase	GO:0019605|butyrate metabolic process;GO:0030435|sporulation resulting in formation of a cellular sporeGO:0006631|fatty acid metabolic process;GO:0055114|oxidation-reduction process	GO:0003857|3-hydroxyacyl-CoA dehydrogenase activity;GO:0008691|3-hydroxybutyryl-CoA dehydrogenase activity;GO:0070403|NAD+ bindingGO:0003857|3-hydroxyacyl-CoA dehydrogenase activity;GO:0016491|oxidoreductase activity	.	K00074|paaH, hbd, fadB, mmgB; 3-hydroxybutyryl-CoA dehydrogenase [EC:1.1.1.157]	map01100|Metabolic pathways;map00650|Butanoate metabolism;map01120|Microbial metabolism in diverse environments;map00360|Phenylalanine metabolism;map00362|Benzoate degradation
evm.model.contig2.707	Protein.evm.model.contig2.707::evm.model.contig2.707	1809187-1810410[+]	gi|627836991|ref|XM_007690510.1|	898	E:0	Bipolaris oryzae ATCC 44560 hypothetical protein partial mRNA	XP_018387983.1	600	E:0	inosine monophosphate dehydrogenase [Alternaria alternata]	PF00478.25	IMPDH	IMP dehydrogenase / GMP reductase domain	COG2070	2-Nitropropane dioxygenase	GO:0055114|oxidation-reduction processGO:0055114|oxidation-reduction process	GO:0018580|nitronate monooxygenase activity;GO:0000166|nucleotide binding;GO:0016491|oxidoreductase activityGO:0003824|catalytic activity;GO:0018580|nitronate monooxygenase activity	.	K00459|ncd2, npd; nitronate monooxygenase [EC:1.13.12.16]	map00910|Nitrogen metabolism
evm.model.contig5.484	Protein.evm.model.contig5.484::evm.model.contig5.484	1274589-1279971[+]	gi|636577860|ref|XM_008022078.1|	880	E:0	Setosphaeria turcica Et28A glycosyltransferase family 1 protein partial mRNA	OWY43825.1	1975	E:0	putative glucosyl/glucuronosyl transferase [Alternaria alternata]	PF03033.20	Glyco_transf_28	Glycosyltransferase family 28 N-terminal domain	COG1819	Transferase	GO:0005975|carbohydrate metabolic process;GO:0009813|flavonoid biosynthetic process;GO:0030259|lipid glycosylation;GO:0010214|seed coat development;GO:0009845|seed germination;GO:0016126|sterol biosynthetic process;GO:0016125|sterol metabolic processGO:0005975|carbohydrate metabolic process;GO:0030259|lipid glycosylation	GO:0102203|brassicasterol glucosyltransferase activity;GO:0102205|cholesterol allpha-glucosyltransferase activity;GO:0102202|soladodine glucosyltransferase activity;GO:0016906|sterol 3-beta-glucosyltransferase activity;GO:0008194|UDP-glycosyltransferase activityGO:0016758|transferase activity, transferring hexosyl groups	GO:0043231|intracellular membrane-bounded organelle;GO:0005774|vacuolar membrane;GO:0005773|vacuole	K05841|E2.4.1.173; sterol 3beta-glucosyltransferase [EC:2.4.1.173]	.
evm.model.contig8.751	Protein.evm.model.contig8.751::evm.model.contig8.751	2063708-2066006[+]	gi|189193012|ref|XM_001932810.1|	414	E:6e-113	Pyrenophora tritici-repentis Pt-1C-BFP mitosis protein dim1, mRNA	RAR13289.1	236	E:4e-73	4A/4B type thioredoxin-like protein [Stemphylium lycopersici]	PF02966.16	DIM1	Mitosis protein DIM1	ENOG4111FE6	Thioredoxin-like protein	GO:0007049|cell cycle;GO:0051301|cell division;GO:0000398|mRNA splicing, via spliceosomeGO:0000398|mRNA splicing, via spliceosome	.	GO:0005737|cytoplasm;GO:0005829|cytosol;GO:0031965|nuclear membrane;GO:0005634|nucleus;GO:0071005|U2-type precatalytic spliceosome;GO:0046540|U4/U6 x U5 tri-snRNP complex;GO:0005682|U5 snRNPGO:0046540|U4/U6 x U5 tri-snRNP complex	K12859|TXNL4A, DIB1; U5 snRNP protein, DIM1 family	map03040|Spliceosome
evm.model.contig9.663	Protein.evm.model.contig9.663::evm.model.contig9.663	1758134-1759226[+]	gi|189191997|ref|XM_001932303.1|	640	E:0	Pyrenophora tritici-repentis Pt-1C-BFP ADP-ribosylation factor family protein, mRNA	XP_001932338.1	319	E:1e-108	ADP-ribosylation factor family protein [Pyrenophora tritici-repentis Pt-1C-BFP]	PF00025.21	Arf	ADP-ribosylation factor family	ENOG410XNUK	ADP-ribosylation factor-like	GO:0007049|cell cycle;GO:0051301|cell division;GO:0007059|chromosome segregation	GO:0005525|GTP bindingGO:0005525|GTP binding;GO:0003924|GTPase activity	GO:0031902|late endosome membrane;GO:0005765|lysosomal membrane;GO:0005819|spindle;GO:0005774|vacuolar membrane	K07955|ARL8; ADP-ribosylation factor-like protein 8	.
evm.model.contig5.1071	Protein.evm.model.contig5.1071::evm.model.contig5.1071	2804580-2806134[-]	gi|628238761|ref|XM_007719370.1|	752	E:0	Bipolaris zeicola 26-R-13 glycosyltransferase family 1 protein partial mRNA	RII07004.1	850	E:0	glycosyltransferase family 1 protein [Alternaria sp. MG1]	PF03033.20	Glyco_transf_28	Glycosyltransferase family 28 N-terminal domain	COG1819	Transferase	GO:0005975|carbohydrate metabolic process;GO:0009813|flavonoid biosynthetic process;GO:0030259|lipid glycosylation;GO:0010214|seed coat development;GO:0009845|seed germination;GO:0016126|sterol biosynthetic process;GO:0016125|sterol metabolic processGO:0005975|carbohydrate metabolic process;GO:0030259|lipid glycosylation	GO:0102203|brassicasterol glucosyltransferase activity;GO:0102205|cholesterol allpha-glucosyltransferase activity;GO:0102202|soladodine glucosyltransferase activity;GO:0016906|sterol 3-beta-glucosyltransferase activity;GO:0008194|UDP-glycosyltransferase activityGO:0016758|transferase activity, transferring hexosyl groups	GO:0043231|intracellular membrane-bounded organelle;GO:0005774|vacuolar membrane;GO:0005773|vacuole	K05841|E2.4.1.173; sterol 3beta-glucosyltransferase [EC:2.4.1.173]	.
evm.model.contig1.720	Protein.evm.model.contig1.720::evm.model.contig1.720	1791114-1791760[+]	gi|636582832|ref|XM_008024564.1|	388	E:2e-105	Setosphaeria turcica Et28A hypothetical protein mRNA	RII06361.1	231	E:4e-73	hypothetical protein CUC08_Gglean009582 [Alternaria sp. MG1]	PF04729.13	ASF1_hist_chap	ASF1 like histone chaperone	COG5137	ASF1 anti-silencing function 1 homolog	GO:0016573|histone acetylation;GO:0006334|nucleosome assembly;GO:0006337|nucleosome disassemblyGO:0006333|chromatin assembly or disassembly	GO:0042393|histone binding	GO:0005634|nucleusGO:0005634|nucleus	K10753|ASF1; histone chaperone ASF1	.
evm.model.contig7.48	Protein.evm.model.contig7.48::evm.model.contig7.48	140269-141802[-]	gi|636583796|ref|XM_008025046.1|	1315	E:0	Setosphaeria turcica Et28A hypothetical protein mRNA	XP_018385381.1	954	E:0	acyl-CoA dehydrogenase family member 11 [Alternaria alternata]	PF02771.16	Acyl-CoA_dh_N	Acyl-CoA dehydrogenase, N-terminal domain	COG3173	Aminoglycoside phosphotransferase	GO:0055114|oxidation-reduction process	GO:0050660|flavin adenine dinucleotide binding;GO:0016627|oxidoreductase activity, acting on the CH-CH group of donorsGO:0016627|oxidoreductase activity, acting on the CH-CH group of donors;GO:0050660|flavin adenine dinucleotide binding	GO:0005777|peroxisome	K11730|ACAD11; acyl-CoA dehydrogenase family member 11	.
evm.model.contig10.542	Protein.evm.model.contig10.542::evm.model.contig10.542	1390510-1392721[+]	gi|189189491|ref|XM_001931050.1|	477	E:2e-131	Pyrenophora tritici-repentis Pt-1C-BFP G patch domain containing protein 1, mRNA	KNG48685.1	752	E:0	g patch domain containing protein 1 [Stemphylium lycopersici]	PF07713.13	DUF1604	Protein of unknown function (DUF1604)	ENOG410Y3I1	G patch domain containing 1	GO:0006397|mRNA processingGO:0006397|mRNA processing	GO:0003723|RNA binding	GO:0005634|nucleus	K13123|GPATCH1; G patch domain-containing protein 1	.
evm.model.contig8.399	Protein.evm.model.contig8.399::evm.model.contig8.399	1166666-1167933[-]	gi|628054719|ref|XM_007696315.1|	316	E:2e-83	Cochliobolus sativus ND90Pr hypothetical protein mRNA	RYN62107.1	610	E:0	hypothetical protein AA0114_g224 [Alternaria tenuissima]	PF08240.12	ADH_N	Alcohol dehydrogenase GroES-like domain	COG1063	Dehydrogenase	GO:0055114|oxidation-reduction process	GO:0000721|(R,R)-butanediol dehydrogenase activity;GO:0008270|zinc ion binding	.	K00004|BDH, butB; (R,R)-butanediol dehydrogenase / meso-butanediol dehydrogenase / diacetyl reductase [EC:1.1.1.4 1.1.1.- 1.1.1.303]	map00650|Butanoate metabolism
evm.model.contig3.1032	Protein.evm.model.contig3.1032::evm.model.contig3.1032	2705406-2706002[-]	gi|396476684|ref|XM_003840044.1|	231	E:3e-58	Leptosphaeria maculans JN3 similar to ubiquitin-conjugating enzyme (LEMA_P108780.1) mRNA, complete cds	XP_018388838.1	305	E:1e-103	ubiquitin-conjugating enzyme [Alternaria alternata]	PF00179.26	UQ_con	Ubiquitin-conjugating enzyme	COG5078	ubiquitin-conjugating enzyme	GO:0007031|peroxisome organization;GO:0016558|protein import into peroxisome matrix	GO:0005524|ATP binding;GO:0061631|ubiquitin conjugating enzyme activity	GO:0005777|peroxisome	K10689|PEX4; peroxin-4 [EC:2.3.2.23]	.
evm.model.contig9.676	Protein.evm.model.contig9.676::evm.model.contig9.676	1788583-1789191[+]	gi|636592436|ref|XM_008029366.1|	222	E:3e-55	Setosphaeria turcica Et28A hypothetical protein partial mRNA	OWY51874.1	362	E:4e-121	WD40 repeat-like protein [Alternaria alternata]	PF00400.32	WD40	WD domain, G-beta repeat	ENOG410XP3K	Positively regulates the activity of the minus-end directed microtubule motor protein dynein. May enhance dynein- mediated microtubule sliding by targeting dynein to the microtubule plus end. Required for	GO:0043966|histone H3 acetylation;GO:0051568|histone H3-K4 methylation;GO:0043984|histone H4-K16 acetylation;GO:0043981|histone H4-K5 acetylation;GO:0043982|histone H4-K8 acetylation;GO:0031175|neuron projection development;GO:0035948|positive regulation of gluconeogenesis by positive regulation of transcription from RNA polymerase II promoter;GO:0001501|skeletal system development	GO:0046972|histone acetyltransferase activity (H4-K16 specific);GO:0043995|histone acetyltransferase activity (H4-K5 specific);GO:0043996|histone acetyltransferase activity (H4-K8 specific);GO:0042393|histone binding;GO:0042800|histone methyltransferase activity (H3-K4 specific);GO:0035064|methylated histone bindingGO:0005515|protein binding	GO:0005671|Ada2/Gcn5/Ada3 transcription activator complex;GO:0000123|histone acetyltransferase complex;GO:0035097|histone methyltransferase complex;GO:0071339|MLL1 complex;GO:0044666|MLL3/4 complex;GO:0005634|nucleus;GO:0048188|Set1C/COMPASS complex	K14963|WDR5, SWD3, CPS30; COMPASS component SWD3	.
evm.model.contig5.777	Protein.evm.model.contig5.777::evm.model.contig5.777	2055451-2057960[-]	gi|636584570|ref|XM_008025433.1|	601	E:1e-168	Setosphaeria turcica Et28A hypothetical protein mRNA	XP_018386967.1	1246	E:0	KEX1 protease precursor [Alternaria alternata]	PF00082.22	Peptidase_S8	Subtilase family	COG1404	peptidase (S8 and S53, subtilisin, kexin, sedolisin	GO:0007323|peptide pheromone maturation;GO:0016540|protein autoprocessingGO:0006508|proteolysis	GO:0004252|serine-type endopeptidase activity;GO:0004867|serine-type endopeptidase inhibitor activityGO:0004252|serine-type endopeptidase activity	GO:0016021|integral component of membrane;GO:0005802|trans-Golgi network	K01341|E3.4.21.61; kexin [EC:3.4.21.61]	.
evm.model.contig5.657	Protein.evm.model.contig5.657::evm.model.contig5.657	1734031-1739094[+]	gi|189197580|ref|XM_001935093.1|	636	E:5e-179	Pyrenophora tritici-repentis Pt-1C-BFP helicase swr1, mRNA	RYN64558.1	2244	E:0	Helicase [Alternaria tenuissima]	PF07529.13	HSA	HSA	ENOG410XP0A	chromatin modification	GO:0006325|chromatin organization	GO:0005524|ATP binding;GO:0003677|DNA binding;GO:0003678|DNA helicase activityGO:0003677|DNA binding;GO:0005524|ATP binding;GO:0016787|hydrolase activity	GO:0005634|nucleus	K11681|SWR1; helicase SWR1 [EC:3.6.4.12]	.
evm.model.contig3.211	Protein.evm.model.contig3.211::evm.model.contig3.211	581203-583123[+]	gi|628204369|ref|XM_007713455.1|	566	E:3e-158	Bipolaris zeicola 26-R-13 hypothetical protein partial mRNA	RYN51275.1	525	E:2e-176	hypothetical protein AA0114_g5668 [Alternaria tenuissima]	PF00646.33	F-box	F-box domain	ENOG410XQ54	F-box and leucine-rich repeat protein	GO:0016567|protein ubiquitination;GO:0031146|SCF-dependent proteasomal ubiquitin-dependent protein catabolic process;GO:0006511|ubiquitin-dependent protein catabolic process	GO:0005515|protein binding	GO:0005737|cytoplasm;GO:0019005|SCF ubiquitin ligase complex	K10268|FBXL2_20; F-box and leucine-rich repeat protein 2/20	.
evm.model.contig7.710	Protein.evm.model.contig7.710::evm.model.contig7.710	1822308-1825496[-]	gi|627917296|ref|XM_007693760.1|	407	E:3e-110	Bipolaris oryzae ATCC 44560 hypothetical protein partial mRNA	XP_018386533.1	1189	E:0	hypothetical protein CC77DRAFT_987905 [Alternaria alternata]	PF05188.17	MutS_II	MutS domain II	COG0249	that it carries out the mismatch recognition step. This protein has a weak ATPase activity (By similarity)	GO:0007292|female gamete generation;GO:0006298|mismatch repair;GO:0001541|ovarian follicle development;GO:0007131|reciprocal meiotic recombination;GO:0000712|resolution of meiotic recombination intermediates;GO:0007283|spermatogenesis;GO:0007129|synapsisGO:0006298|mismatch repair	GO:0005524|ATP binding;GO:0003677|DNA binding;GO:0008094|DNA-dependent ATPase activity;GO:0030983|mismatched DNA bindingGO:0005524|ATP binding;GO:0030983|mismatched DNA binding	GO:0032300|mismatch repair complex;GO:0000228|nuclear chromosome;GO:0005634|nucleus;GO:0005713|recombination nodule;GO:0000795|synaptonemal complex	K08740|MSH4; DNA mismatch repair protein MSH4	.
evm.model.contig5.700	Protein.evm.model.contig5.700::evm.model.contig5.700	1855636-1857871[-]	gi|636578508|ref|XM_008022402.1|	946	E:0	Setosphaeria turcica Et28A hypothetical protein partial mRNA	RYN64542.1	1047	E:0	hypothetical protein AA0118_g3674 [Alternaria tenuissima]	PF13418.6	Kelch_4	Galactose oxidase, central domain	COG5184	regulator of chromosome condensation	GO:0007049|cell cycle;GO:0006325|chromatin organization	GO:0005515|protein binding	GO:0005737|cytoplasm;GO:0005634|nucleus	K11494|RCBTB; RCC1 and BTB domain-containing protein	.
evm.model.contig1.969	Protein.evm.model.contig1.969::evm.model.contig1.969	2376450-2378206[+]	gi|636582504|ref|XM_008024400.1|	996	E:0	Setosphaeria turcica Et28A hypothetical protein mRNA	XP_018389622.1	951	E:0	ubiquitin carboxyl-terminal hydrolase 2 [Alternaria alternata]	PF02148.19	zf-UBP	Zn-finger in ubiquitin-hydrolases and other protein	ENOG410XQQ0	ubiquitin carboxyl-terminal hydrolase	GO:0007049|cell cycle;GO:0016578|histone deubiquitination;GO:0016574|histone ubiquitination;GO:0045931|positive regulation of mitotic cell cycle;GO:0045893|positive regulation of transcription, DNA-templated;GO:0006511|ubiquitin-dependent protein catabolic processGO:0016579|protein deubiquitination	GO:0019899|enzyme binding;GO:0010485|H4 histone acetyltransferase activity;GO:0030374|nuclear receptor transcription coactivator activity;GO:0004843|thiol-dependent ubiquitin-specific protease activity;GO:0008270|zinc ion bindingGO:0008270|zinc ion binding;GO:0036459|thiol-dependent ubiquitinyl hydrolase activity	GO:0016607|nuclear speck;GO:0000124|SAGA complex	K11366|USP22_27_51, UBP8; ubiquitin carboxyl-terminal hydrolase 22/27/51 [EC:3.4.19.12]	.
[truncated: 12,433 more rows]

## Sheet: S8
Supplementary Table 8 virulence factors predicted.
[truncated: 2,181 more rows]

## Sheet: S9
Supplementary Table 9 The type of Virus factors.
[truncated: 776 more rows]
